# Supplementary material for: Inherited duplications of PPP2R3B predispose to nevi and melanoma via a C21orf91-driven proliferative phenotype
Source: Springer Nature journal article supplement (doi:10.1038/s41436-021-01204-y), 2021-06-18
Supplement: MOESM3 [file 41436_2021_1204_MOESM3_ESM.xls]

## Sheet: Pathway Maps
Enrichment analysis report
Enrichment by Pathway Maps
#	Pathway Enriched	Total	pValue	Min FDR	p-value	FDR	In Data	Network Objects from Active Data
1	HSP70 and HSP40-dependent folding in Huntington's disease	25	3.64835e-10	1.37908e-07	3.64835e-10	1.37908e-07	6	HSP90, HSP70, HSPA1A, HSP90 alpha, Ubiquitin, HSC70
2	Immune response_Antigen presentation by MHC class I: cross-presentation	99	8.23868e-08	1.55711e-05	8.23868e-08	1.55711e-05	7	HSP90, A2M receptor, HSP70, Rab-27A, HSPA1A, HSP90 alpha, RAB-5B
3	Regulation of degradation of deltaF508-CFTR in CF	39	1.37977e-05	0.00173851	1.37977e-05	0.00173851	4	HSP90, HSP70, Ubiquitin, HSC70
4	Mechanisms of deltaF508 CFTR activation by S-nitrosoglutathione	47	2.92635e-05	0.0027654	2.92635e-05	0.0027654	4	HSP90, HSP70, HSP90 alpha, HSC70
5	Regulation of degradation of wtCFTR	20	5.65947e-05	0.00355596	5.65947e-05	0.00355596	3	HSP90, Ubiquitin, HSC70
6	HCV-dependent transcription regulation leading to HCC	21	6.58512e-05	0.00355596	6.58512e-05	0.00355596	3	HSP70, HSPA1A, Cyclin D1
7	Possible regulation of HSF-1/ chaperone pathway in Huntington's disease	21	6.58512e-05	0.00355596	6.58512e-05	0.00355596	3	HSP90, HSP70, HSP90 alpha
8	Transcription_Negative regulation of HIF1A function	69	0.000133435	0.00630479	0.000133435	0.00630479	4	HSP90, HSP70, Ubiquitin, HSC70
9	LRRK2 in neurons in Parkinson's disease	33	0.000261633	0.0109886	0.000261633	0.0109886	3	HSP90, Ubiquitin, RAB-5B
10	Cell cycle_Regulation of G1/S transition (part 1)	38	0.000399183	0.0137174	0.000399183	0.0137174	3	Cyclin D, Ubiquitin, Cyclin D1

## Sheet: Process Networks
Enrichment analysis report
Enrichment by Process Networks					Maanasa_Nov2018_deseq-list_noPPP
#	Networks	Total	pValue	Min FDR	p-value	FDR	In Data	Network Objects from Active Data
1	Protein folding_Response to unfolded proteins	69	8.2618e-07	6.93991e-05	8.2618e-07	6.93991e-05	7	HSP90, A2M receptor, HSPA1B, HSP70, HSPA1A, HSP90 alpha, HSC70
2	Protein folding_Folding in normal condition	119	0.000285427	0.00963264	0.000285427	0.00963264	6	HSP90, HSPA1B, HSP70, HSPA1A, HSP90 alpha, HSC70
3	Protein folding_ER and cytoplasm	44	0.000344023	0.00963264	0.000344023	0.00963264	4	HSP90, HSP70, HSPA1A, HSC70
4	Protein folding_Protein folding nucleus	58	0.000992527	0.0208431	0.000992527	0.0208431	4	HSP90, HSPA1B, HSP70, HSC70
5	Cell adhesion_Platelet-endothelium-leucocyte interactions	174	0.00209961	0.0352734	0.00209961	0.0352734	6	A2M receptor, Cyr61, SHPS-1, CTGF, SERPINE2, IGFBP7/8
6	Transport_Manganese transport	104	0.00828024	0.115923	0.00828024	0.115923	4	PRNP, NRAMP2, 5'-NTD, CNDP2
7	Development_Neurogenesis in general	192	0.0158233	0.167111	0.0158233	0.167111	5	MEF2C, POU class III, POU3F2 (BRN2), Calcipressin 1, SERPINE2
8	Signal transduction_Androgen receptor nuclear signaling	126	0.0159153	0.167111	0.0159153	0.167111	4	HSP90, Cyclin D1, SVIL, GREB1
9	Proteolysis_ECM remodeling	85	0.027598	0.241417	0.027598	0.241417	3	A2M receptor, TIMP3, CTGF
10	Cardiac development_Wnt_beta-catenin, Notch, VEGF, IP3 and integrin signaling	151	0.0287458	0.241417	0.0287458	0.241417	4	MEF2C, DKK1, MEF2, Calcipressin 1

## Sheet: Diseases (by Biomarkers)
Enrichment analysis report
Enrichment by Diseases (by Biomarkers)					Maanasa_Nov2018_deseq-list_noPPP
#	Diseases	Total	pValue	Min FDR	p-value	FDR	In Data	Network Objects from Active Data
1	Mental Disorders	3964	3.65672e-14	1.82852e-11	3.65672e-14	1.82852e-11	48	PDE4, HSP90, MEF2C, A2M receptor, Calponin-3, Creatine transporter 1 (SLC6A8), HSPA1B, PDE4B, PIP5KII, Myoferlin, MICAL2, PRNP, DKK1, SHPS-1, CTGF COOH-terminal fragment, UQCRFS1, NET1, Ephrin-A receptors, Cyclin D, TGM2, HSP70, ANO6, TIMP3, ENO2, NRAMP2, POU class III, A2M receptor (ICD), CTGF NH2-terminal fragment, HSPA1A, POU3F2 (BRN2), HSP90 alpha, 5'-NTD, Semaphorin 3A, PDE, Annexin I, MEF2,…
2	Psychiatry and Psychology	3977	4.15102e-14	1.82852e-11	4.15102e-14	1.82852e-11	48	PDE4, HSP90, MEF2C, A2M receptor, Calponin-3, Creatine transporter 1 (SLC6A8), HSPA1B, PDE4B, PIP5KII, Myoferlin, MICAL2, PRNP, DKK1, SHPS-1, CTGF COOH-terminal fragment, UQCRFS1, NET1, Ephrin-A receptors, Cyclin D, TGM2, HSP70, ANO6, TIMP3, ENO2, NRAMP2, POU class III, A2M receptor (ICD), CTGF NH2-terminal fragment, HSPA1A, POU3F2 (BRN2), HSP90 alpha, 5'-NTD, Semaphorin 3A, PDE, Annexin I, MEF2,…
3	Tauopathies	1515	7.81866e-14	2.29608e-11	7.81866e-14	2.29608e-11	30	PDE4, HSP90, A2M receptor, HSPA1B, PDE4B, Myoferlin, PRNP, DKK1, CTGF COOH-terminal fragment, Ephrin-A receptors, Cyclin D, HSP70, TIMP3, ENO2, NRAMP2, A2M receptor (ICD), CTGF NH2-terminal fragment, HSPA1A, HSP90 alpha, Semaphorin 3A, PDE, MEF2, Ubiquitin, Calcipressin 1, APRIO, Cyclin D1, ENO, CTGF, SVIL, IGFBP7/8
4	Pathologic Processes	2936	3.61709e-13	7.96663e-11	3.61709e-13	7.96663e-11	40	Cyclin G, PDE4, HSP90, A2M receptor, Creatine transporter 1 (SLC6A8), HSPA1B, LIF, Cyr61, Myoferlin, IL1RAP, PRNP, NDRG1, DKK1, CTGF COOH-terminal fragment, NET1, Cyclin D, Cyclin G1, TGM2, HSP70, TIMP3, NRAMP2, MVP, PPA5, A2M receptor (ICD), CTGF NH2-terminal fragment, HSPA1A, HSP90 alpha, Semaphorin 3A, PDE, Annexin I, MEF2, Ubiquitin, APRIO, CD166, Cyclin D1, ENO, CTGF, CDH19, HSC70, IGFBP7/8
5	Neurodegenerative Diseases	2706	7.249e-13	1.27727e-10	7.249e-13	1.27727e-10	38	PDE4, HSP90, A2M receptor, HSPA1B, PDE4B, Cyr61, Myoferlin, PRNP, NDRG1, DKK1, CTGF COOH-terminal fragment, UQCRFS1, Ephrin-A receptors, Cyclin D, TGM2, HSP70, TIMP3, ENO2, NRAMP2, POU class III, A2M receptor (ICD), CTGF NH2-terminal fragment, HSPA1A, POU3F2 (BRN2), HSP90 alpha, CTNNAL1, Semaphorin 3A, PDE, Annexin I, MEF2, Ubiquitin, Calcipressin 1, APRIO, Cyclin D1, ENO, CTGF, SVIL, IGFBP7/8
6	Neurocognitive Disorders	2052	1.06156e-12	1.37234e-10	1.06156e-12	1.37234e-10	33	PDE4, A2M receptor, HSPA1B, PDE4B, Myoferlin, PRNP, DKK1, CTGF COOH-terminal fragment, UQCRFS1, Ephrin-A receptors, Cyclin D, TGM2, HSP70, TIMP3, ENO2, NRAMP2, POU class III, A2M receptor (ICD), CTGF NH2-terminal fragment, HSPA1A, POU3F2 (BRN2), Semaphorin 3A, PDE, Annexin I, MEF2, Ubiquitin, Calcipressin 1, APRIO, Cyclin D1, ENO, CTGF, SVIL, IGFBP7/8
7	Dementia	2054	1.0904e-12	1.37234e-10	1.0904e-12	1.37234e-10	33	PDE4, A2M receptor, HSPA1B, PDE4B, Myoferlin, PRNP, DKK1, CTGF COOH-terminal fragment, UQCRFS1, Ephrin-A receptors, Cyclin D, TGM2, HSP70, TIMP3, ENO2, NRAMP2, POU class III, A2M receptor (ICD), CTGF NH2-terminal fragment, HSPA1A, POU3F2 (BRN2), Semaphorin 3A, PDE, Annexin I, MEF2, Ubiquitin, Calcipressin 1, APRIO, Cyclin D1, ENO, CTGF, SVIL, IGFBP7/8
8	Alzheimer Disease	1502	2.77262e-12	2.77347e-10	2.77262e-12	2.77347e-10	28	PDE4, A2M receptor, HSPA1B, PDE4B, Myoferlin, PRNP, DKK1, CTGF COOH-terminal fragment, Ephrin-A receptors, Cyclin D, HSP70, TIMP3, ENO2, NRAMP2, A2M receptor (ICD), CTGF NH2-terminal fragment, HSPA1A, Semaphorin 3A, PDE, MEF2, Ubiquitin, Calcipressin 1, APRIO, Cyclin D1, ENO, CTGF, SVIL, IGFBP7/8
9	Stomach Neoplasms	4444	2.83329e-12	2.77347e-10	2.83329e-12	2.77347e-10	48	Cyclin G, PDE4, HSP90, MEF2C, A2M receptor, HSPA1B, MATP, LIF, Ephrin-A receptor 3, PDE4B, Cyr61, UBC, PRNP, NDRG1, DKK1, SHPS-1, CTGF COOH-terminal fragment, UQCRFS1, Ephrin-A receptors, NP14, Cyclin D, UNC5C, HSP70, ANO6, TIMP3, RHG7, MVP, PPA5, A2M receptor (ICD), Plastin, CTGF NH2-terminal fragment, HSPA1A, HSP90 alpha, 5'-NTD, PDE, Annexin I, MEF2, Piccolo, Ubiquitin, APRIO, CD166, Cyclin D1…
10	Hemic and Lymphatic Diseases	5201	3.72055e-12	3.27781e-10	3.72055e-12	3.27781e-10	52	PDE4, HSP90, A2M receptor, Calponin-3, HSPA1B, MATP, AHNAK, LIF, Ephrin-A receptor 3, TBC1D16, PDE4B, TNIK, PRNP, DKK1, SHPS-1, CTGF COOH-terminal fragment, Ephrin-A receptors, Cyclin D, TGM2, HSP70, TIMP3, RHG7, ENO2, NRAMP2, POU class III, USP53, CRACC, MVP, PPA5, A2M receptor (ICD), Plastin, Rab-27A, CTGF NH2-terminal fragment, HSPA1A, MICALCL, EGFL5, HSP90 alpha, 5'-NTD, Semaphorin 3A, PDE, M…

## Sheet: GO Processes
Enrichment analysis report
Enrichment by GO Processes					Maanasa_Nov2018_deseq-list_noPPP
#	Processes	Total	pValue	Min FDR	p-value	FDR	In Data	Network Objects from Active Data
1	regulation of cellular component organization	3455	1.00827e-12	3.11149e-09	1.00827e-12	3.11149e-09	43	HSP90, MEF2C, A2M receptor, C21orf91, HSPA1B, LIF, Ephrin-A receptor 3, TBC1D16, Cyr61, PIP5KII, TBC1D14, TNIK, IL1RAP, PRNP, DKK1, SHPS-1, NET1, Ephrin-A receptors, HSP70, ANO6, RHG7, POU class III, Plastin, PLEKHM1, Rab-27A, HSPA1A, POU3F2 (BRN2), HSP90 alpha, Semaphorin 3A, PDE, Annexin I, MEF2, CENPJ, APRIO, PI52A, ENO, Band 4.1-like protein 2, CTGF, RNF20, SERPINE2, HSC70, IGFBP7/8, RAB-5B
2	regulation of apoptotic process	2336	1.98736e-12	3.11149e-09	1.98736e-12	3.11149e-09	35	Cyclin G, HSP90, MEF2C, A2M receptor, HSPA1B, Ephrin-A receptor 3, Cyr61, UBC, TNIK, PRNP, NDRG1, DKK1, NET1, Ephrin-A receptors, Cyclin D, Cyclin G1, TGM2, UNC5C, HSP70, ANO6, TIMP3, RHG7, NRAMP2, POU class III, HSPA1A, PTTG1IP, PDE, Annexin I, MEF2, Ubiquitin, APRIO, ENO, CTGF, HSC70, IGFBP7/8
3	regulation of programmed cell death	2357	2.57148e-12	3.11149e-09	2.57148e-12	3.11149e-09	35	Cyclin G, HSP90, MEF2C, A2M receptor, HSPA1B, Ephrin-A receptor 3, Cyr61, UBC, TNIK, PRNP, NDRG1, DKK1, NET1, Ephrin-A receptors, Cyclin D, Cyclin G1, TGM2, UNC5C, HSP70, ANO6, TIMP3, RHG7, NRAMP2, POU class III, HSPA1A, PTTG1IP, PDE, Annexin I, MEF2, Ubiquitin, APRIO, ENO, CTGF, HSC70, IGFBP7/8
4	positive regulation of cellular process	7012	5.43338e-12	3.81501e-09	5.43338e-12	3.81501e-09	61	RAM2, PDE4, HSP90, MEF2C, A2M receptor, C21orf91, HSPA1B, LIF, Ephrin-A receptor 3, Cyr61, BAZ1B, UBC, PIP5KII, MICAL2, TNIK, IL1RAP, PRNP, NDRG1, DKK1, SHPS-1, NET1, Ephrin-A receptors, NP14, Cyclin D, TGM2, UNC5C, HSP70, ANO6, TIMP3, RHG7, NRAMP2, POU class III, SKAP55, PPA5, Plastin, PLEKHM1, Rab-27A, HSPA1A, POU3F2 (BRN2), BAF170, ARRDC3, PTTG1IP, HSP90 alpha, Semaphorin 3A, PDE, Annexin I, M…
5	regulation of cell death	2568	5.93025e-12	3.81501e-09	5.93025e-12	3.81501e-09	36	Cyclin G, HSP90, MEF2C, A2M receptor, HSPA1B, Ephrin-A receptor 3, Cyr61, UBC, TNIK, PRNP, NDRG1, DKK1, NET1, Ephrin-A receptors, Cyclin D, Cyclin G1, TGM2, UNC5C, HSP70, ANO6, TIMP3, RHG7, ENO2, NRAMP2, POU class III, HSPA1A, PTTG1IP, PDE, Annexin I, MEF2, Ubiquitin, APRIO, ENO, CTGF, HSC70, IGFBP7/8
6	system development	6416	6.79428e-12	3.81501e-09	6.79428e-12	3.81501e-09	58	Cyclin G, PDE4, HSP90, MEF2C, A2M receptor, Creatine transporter 1 (SLC6A8), C21orf91, HSPA1B, LIF, Ephrin-A receptor 3, IGSF3, Cyr61, BAZ1B, PIP5KII, MICAL2, TNIK, IL1RAP, NDRG1, DKK1, SHPS-1, Ephrin-A receptors, NP14, Cyclin D, NASP, Cyclin G1, TGM2, UNC5C, HSP70, ANO6, TIMP3, RHG7, NRAMP2, POU class III, PPA5, Plastin, HSPA1A, POU3F2 (BRN2), BAF170, ARRDC3, HSP90 alpha, 5'-NTD, Semaphorin 3A, …
7	regulation of catalytic activity	3184	7.35676e-12	3.81501e-09	7.35676e-12	3.81501e-09	40	Cyclin G, HSP90, MEF2C, A2M receptor, Calponin-3, WDR81, HSPA1B, Ephrin-A receptor 3, TBC1D16, Cyr61, UBC, TBC1D14, TNIK, PRNP, DKK1, NET1, Ephrin-A receptors, Cyclin D, Cyclin G1, HSP70, TIMP3, RHG7, NRAMP2, MVP, HSPA1A, ARRDC3, HSP90 alpha, PDE, Annexin I, MEF2, Ubiquitin, ARRDC4, Calcipressin 1, APRIO, Cyclin D1, CTGF, SERPINE2, HSC70, IGFBP7/8, RAIG1
8	regulation of cellular protein metabolic process	3541	1.0846e-11	4.92137e-09	1.0846e-11	4.92137e-09	42	Cyclin G, PDE4, HSP90, MEF2C, A2M receptor, HSPA1B, LIF, Ephrin-A receptor 3, Cyr61, UBC, TNIK, PRNP, DKK1, Ephrin-A receptors, NP14, Cyclin D, Cyclin G1, HSP70, TIMP3, RHG7, NRAMP2, MVP, HSPA1A, ARRDC3, PTTG1IP, HSP90 alpha, Semaphorin 3A, PDE, MEF2, Ubiquitin, ARRDC4, C7orf30, Calcipressin 1, APRIO, Cyclin D1, ENO, CTGF, RNF20, SERPINE2, HSC70, IGFBP7/8, RAIG1
9	regulation of protein modification process	2520	1.72989e-11	6.97721e-09	1.72989e-11	6.97721e-09	35	Cyclin G, PDE4, HSP90, MEF2C, HSPA1B, LIF, Ephrin-A receptor 3, Cyr61, UBC, TNIK, PRNP, DKK1, Ephrin-A receptors, Cyclin D, Cyclin G1, HSP70, TIMP3, RHG7, MVP, HSPA1A, ARRDC3, PTTG1IP, HSP90 alpha, Semaphorin 3A, PDE, MEF2, Ubiquitin, ARRDC4, Calcipressin 1, APRIO, Cyclin D1, CTGF, RNF20, IGFBP7/8, RAIG1
10	positive regulation of biological process	7879	2.05456e-11	7.45806e-09	2.05456e-11	7.45806e-09	64	RAM2, PDE4, HSP90, MEF2C, A2M receptor, C21orf91, HSPA1B, LIF, Ephrin-A receptor 3, PDE4B, Cyr61, BAZ1B, UBC, PIP5KII, MICAL2, TNIK, IL1RAP, PRNP, NDRG1, DKK1, SHPS-1, NET1, Ephrin-A receptors, NP14, Cyclin D, TGM2, UNC5C, HSP70, ANO6, TIMP3, RHG7, NRAMP2, POU class III, SKAP55, PPA5, Plastin, PLEKHM1, Rab-27A, HSPA1A, POU3F2 (BRN2), BAF170, ARRDC3, PTTG1IP, HSP90 alpha, 5'-NTD, Semaphorin 3A, PD…
