# Supplementary material for: Inherited duplications of PPP2R3B predispose to nevi and melanoma via a C21orf91-driven proliferative phenotype
Source: Genet Med. 2021 Jun 18;23(9):1636–47. doi: 10.1038/s41436-021-01204-y (PMC8460442; doi:10.1038/s41436-021-01204-y)
Supplement: Supplementary file 2 — Supplementary information [file 41436_2021_1204_MOESM2_ESM.xlsx]

## Sheet: Figure 3b SKMEL2
Block Type	96well
Chemistry	TAQMAN
Experiment File Name	\\Mac\Home\Desktop\New Folder With Items\PPP2R3B\QPCR DATA\Mansa smel2 ppp 131117.eds
Experiment Run End Time	2017-11-14 00:03:46 AM GMT
Instrument Type	steponeplus
Passive Reference	ROX
Well	Sample Name	Target Name	Task	Reporter	Quencher	RQ	RQ Min	RQ Max	Cт	Cт Mean	Cт SD	ΔCт	ΔCт Mean	ΔCт SE	HK Control ΔCт Mean	HK Control ΔCт SE	ΔΔCт	Automatic Ct Threshold	Ct Threshold	Automatic Baseline	Baseline Start	Baseline End	Efficiency	Comments		ΔΔCт
A1	UNINDUCED 1	PPP	UNKNOWN	FAM	NFQ-MGB	1	0.845656	1.18251	29.6358	29.6917	0.0503601		-0.0233974	0.0871102			0	FALSE	0.122064	TRUE	3	25	1			0	1.68646	2.03343	3.61051	3.54184	-2.45423
A2	UNINDUCED 1	PPP	UNKNOWN	FAM	NFQ-MGB	1	0.845656	1.18251	29.7336	29.6917	0.0503601		-0.0233974	0.0871102			0	FALSE	0.122064	TRUE	3	25	1			0
A3	UNINDUCED 1	PPP	UNKNOWN	FAM	NFQ-MGB	1	0.845656	1.18251	29.7057	29.6917	0.0503601		-0.0233974	0.0871102			0	FALSE	0.122064	TRUE	3	25	1			0
A4	16h 3	PPP	UNKNOWN	FAM	NFQ-MGB	5.11636	3.78437	6.91716	23.8648	23.7307	0.116946		-2.37851	0.156698			-2.35512	FALSE	0.122064	TRUE	3	19	1
A5	16h 3	PPP	UNKNOWN	FAM	NFQ-MGB	5.11636	3.78437	6.91716	23.6777	23.7307	0.116946		-2.37851	0.156698			-2.35512	FALSE	0.122064	TRUE	3	19	1
A6	16h 3	PPP	UNKNOWN	FAM	NFQ-MGB	5.11636	3.78437	6.91716	23.6497	23.7307	0.116946		-2.37851	0.156698			-2.35512	FALSE	0.122064	TRUE	3	19	1
A7	UNINDUCED 1	GAPDH	UNKNOWN	FAM	NFQ-MGB				29.7672	29.7151	0.142227							TRUE	0.464781	TRUE	3	23	1
A8	UNINDUCED 1	GAPDH	UNKNOWN	FAM	NFQ-MGB				29.8239	29.7151	0.142227							TRUE	0.464781	TRUE	3	23	1
A9	UNINDUCED 1	GAPDH	UNKNOWN	FAM	NFQ-MGB				29.5542	29.7151	0.142227							TRUE	0.464781	TRUE	3	23	1
A10	16h 3	GAPDH	UNKNOWN	FAM	NFQ-MGB				26.3748	26.1092	0.244922							TRUE	0.464781	TRUE	3	19	1
A11	16h 3	GAPDH	UNKNOWN	FAM	NFQ-MGB				25.8921	26.1092	0.244922							TRUE	0.464781	TRUE	3	19	1
A12	16h 3	GAPDH	UNKNOWN	FAM	NFQ-MGB				26.0608	26.1092	0.244922							TRUE	0.464781	TRUE	3	19	1
B1	6h 1	PPP	UNKNOWN	FAM	NFQ-MGB	12.2144	11.2652	13.2436	25.2629	25.2627	0.0693915		-3.63391	0.0420361			-3.61051	FALSE	0.122064	TRUE	3	20	1			-3.61051
B2	6h 1	PPP	UNKNOWN	FAM	NFQ-MGB	12.2144	11.2652	13.2436	25.332	25.2627	0.0693915		-3.63391	0.0420361			-3.61051	FALSE	0.122064	TRUE	3	21	1			-3.61051
B3	6h 1	PPP	UNKNOWN	FAM	NFQ-MGB	12.2144	11.2652	13.2436	25.1932	25.2627	0.0693915		-3.63391	0.0420361			-3.61051	FALSE	0.122064	TRUE	3	21	1			-3.61051
B4		PPP	NTC	FAM	NFQ-MGB				Undetermined									FALSE	0.122064	TRUE	3	39	1
B5		PPP	NTC	FAM	NFQ-MGB				Undetermined									FALSE	0.122064	TRUE	3	39	1
B6		PPP	NTC	FAM	NFQ-MGB				Undetermined									FALSE	0.122064	TRUE	3	39	1
B7	6h 1	GAPDH	UNKNOWN	FAM	NFQ-MGB				28.91	28.8966	0.0220439							TRUE	0.464781	TRUE	3	22	1
B8	6h 1	GAPDH	UNKNOWN	FAM	NFQ-MGB				28.9087	28.8966	0.0220439							TRUE	0.464781	TRUE	3	22	1
B9	6h 1	GAPDH	UNKNOWN	FAM	NFQ-MGB				28.8712	28.8966	0.0220439							TRUE	0.464781	TRUE	3	22	1
B10		GAPDH	NTC	FAM	NFQ-MGB				Undetermined									TRUE	0.464781	TRUE	3	39	1
B11		GAPDH	NTC	FAM	NFQ-MGB				Undetermined									TRUE	0.464781	TRUE	3	39	1
B12		GAPDH	NTC	FAM	NFQ-MGB				Undetermined									TRUE	0.464781	TRUE	3	39	1
C1	16h 1	PPP	UNKNOWN	FAM	NFQ-MGB	17.2332	14.879	19.96	23.7727	23.7493	0.035145		-4.13052	0.0763275			-4.10712	FALSE	0.122064	TRUE	3	19	1			-4.10712
C2	16h 1	PPP	UNKNOWN	FAM	NFQ-MGB	17.2332	14.879	19.96	23.7089	23.7493	0.035145		-4.13052	0.0763275			-4.10712	FALSE	0.122064	TRUE	3	19	1			-4.10712
C3	16h 1	PPP	UNKNOWN	FAM	NFQ-MGB	17.2332	14.879	19.96	23.7664	23.7493	0.035145		-4.13052	0.0763275			-4.10712	FALSE	0.122064	TRUE	3	19	1			-4.10712
C7	16h 1	GAPDH	UNKNOWN	FAM	NFQ-MGB				27.9412	27.8799	0.127446							TRUE	0.464781	TRUE	3	21	1
C8	16h 1	GAPDH	UNKNOWN	FAM	NFQ-MGB				27.7333	27.8799	0.127446							TRUE	0.464781	TRUE	3	21	1
C9	16h 1	GAPDH	UNKNOWN	FAM	NFQ-MGB				27.9651	27.8799	0.127446							TRUE	0.464781	TRUE	3	21	1
D1	UNINDUCED 2	PPP	UNKNOWN	FAM	NFQ-MGB	0.310688	0.280408	0.344237	28.1912	28.1565	0.081825		1.66306	0.0532829			1.68646	FALSE	0.122064	TRUE	3	24	1			1.68646
D2	UNINDUCED 2	PPP	UNKNOWN	FAM	NFQ-MGB	0.310688	0.280408	0.344237	28.063	28.1565	0.081825		1.66306	0.0532829			1.68646	FALSE	0.122064	TRUE	3	24	1			1.68646
D3	UNINDUCED 2	PPP	UNKNOWN	FAM	NFQ-MGB	0.310688	0.280408	0.344237	28.2153	28.1565	0.081825		1.66306	0.0532829			1.68646	FALSE	0.122064	TRUE	3	24	1			1.68646
D7	UNINDUCED 2	GAPDH	UNKNOWN	FAM	NFQ-MGB				26.4634	26.4934	0.0426832							TRUE	0.464781	TRUE	3	19	1
D8	UNINDUCED 2	GAPDH	UNKNOWN	FAM	NFQ-MGB				26.4747	26.4934	0.0426832							TRUE	0.464781	TRUE	3	19	1
D9	UNINDUCED 2	GAPDH	UNKNOWN	FAM	NFQ-MGB				26.5423	26.4934	0.0426832							TRUE	0.464781	TRUE	3	20	1
E1	6h 2	PPP	UNKNOWN	FAM	NFQ-MGB	11.6467	9.64284	14.0669	23.382	23.3353	0.0531689		-3.56524	0.0981061			-3.54184	FALSE	0.122064	TRUE	3	19	1			-3.54184
E2	6h 2	PPP	UNKNOWN	FAM	NFQ-MGB	11.6467	9.64284	14.0669	23.2774	23.3353	0.0531689		-3.56524	0.0981061			-3.54184	FALSE	0.122064	TRUE	3	19	1			-3.54184
E3	6h 2	PPP	UNKNOWN	FAM	NFQ-MGB	11.6467	9.64284	14.0669	23.3464	23.3353	0.0531689		-3.56524	0.0981061			-3.54184	FALSE	0.122064	TRUE	3	19	1			-3.54184
E7	6h 2	GAPDH	UNKNOWN	FAM	NFQ-MGB				26.7785	26.9005	0.161392							TRUE	0.464781	TRUE	3	19	1
E8	6h 2	GAPDH	UNKNOWN	FAM	NFQ-MGB				26.8395	26.9005	0.161392							TRUE	0.464781	TRUE	3	20	1
E9	6h 2	GAPDH	UNKNOWN	FAM	NFQ-MGB				27.0835	26.9005	0.161392							TRUE	0.464781	TRUE	3	20	1
F1	16h 2	PPP	UNKNOWN	FAM	NFQ-MGB	11.2928	9.98275	12.7747	22.3371	22.3163	0.0707897		-3.52072	0.0640709			-3.49733	FALSE	0.122064	TRUE	3	18	1			-3.49733
F2	16h 2	PPP	UNKNOWN	FAM	NFQ-MGB	11.2928	9.98275	12.7747	22.2375	22.3163	0.0707897		-3.52072	0.0640709			-3.49733	FALSE	0.122064	TRUE	3	18	1			-3.49733
F3	16h 2	PPP	UNKNOWN	FAM	NFQ-MGB	11.2928	9.98275	12.7747	22.3744	22.3163	0.0707897		-3.52072	0.0640709			-3.49733	FALSE	0.122064	TRUE	3	18	1			-3.49733
F7	16h 2	GAPDH	UNKNOWN	FAM	NFQ-MGB				25.7898	25.837	0.0854638							TRUE	0.464781	TRUE	3	19	1
F8	16h 2	GAPDH	UNKNOWN	FAM	NFQ-MGB				25.7856	25.837	0.0854638							TRUE	0.464781	TRUE	3	19	1
F9	16h 2	GAPDH	UNKNOWN	FAM	NFQ-MGB				25.9357	25.837	0.0854638							TRUE	0.464781	TRUE	3	19	1
G1	UNINDUCED 3	PPP	UNKNOWN	FAM	NFQ-MGB	0.244273	0.187562	0.318131	28.276	28.3611	0.074639		2.01004	0.137271			2.03343	FALSE	0.122064	TRUE	3	24	1			2.03343
G2	UNINDUCED 3	PPP	UNKNOWN	FAM	NFQ-MGB	0.244273	0.187562	0.318131	28.3919	28.3611	0.074639		2.01004	0.137271			2.03343	FALSE	0.122064	TRUE	3	24	1			2.03343
G3	UNINDUCED 3	PPP	UNKNOWN	FAM	NFQ-MGB	0.244273	0.187562	0.318131	28.4154	28.3611	0.074639		2.01004	0.137271			2.03343	FALSE	0.122064	TRUE	3	24	1			2.03343
G7	UNINDUCED 3	GAPDH	UNKNOWN	FAM	NFQ-MGB				26.3491	26.351	0.225742							TRUE	0.464781	TRUE	3	19	1
G8	UNINDUCED 3	GAPDH	UNKNOWN	FAM	NFQ-MGB				26.1263	26.351	0.225742							TRUE	0.464781	TRUE	3	19	1
G9	UNINDUCED 3	GAPDH	UNKNOWN	FAM	NFQ-MGB				26.5777	26.351	0.225742							TRUE	0.464781	TRUE	3	19	1
H1	6H 3	PPP	UNKNOWN	FAM	NFQ-MGB	5.48022	4.20381	7.14418	23.9678	23.9077	0.052049		-2.47763	0.137779			-2.45423	FALSE	0.122064	TRUE	3	20	1			-2.45423
H2	6H 3	PPP	UNKNOWN	FAM	NFQ-MGB	5.48022	4.20381	7.14418	23.877	23.9077	0.052049		-2.47763	0.137779			-2.45423	FALSE	0.122064	TRUE	3	20	1			-2.45423
H3	6H 3	PPP	UNKNOWN	FAM	NFQ-MGB	5.48022	4.20381	7.14418	23.8783	23.9077	0.052049		-2.47763	0.137779			-2.45423	FALSE	0.122064	TRUE	3	19	1			-2.45423
H7	6H 3	GAPDH	UNKNOWN	FAM	NFQ-MGB				26.3447	26.3853	0.232894							TRUE	0.464781	TRUE	3	19	1
H8	6H 3	GAPDH	UNKNOWN	FAM	NFQ-MGB				26.1754	26.3853	0.232894							TRUE	0.464781	TRUE	3	19	1
H9	6H 3	GAPDH	UNKNOWN	FAM	NFQ-MGB				26.6358	26.3853	0.232894							TRUE	0.464781	TRUE	3	20	1			-2.35512
																										-2.35512
Analysis Type	Singleplex																									-2.35512
Endogenous Control	GAPDH
RQ Min/Max Confidence Level	95.0
Reference Sample	Sample 1

## Sheet: Figure 3b SKMEL30
Block Type	96well
Chemistry	TAQMAN
Experiment File Name	\\Mac\Home\Desktop\New Folder With Items\PPP2R3B\QPCR DATA\SKMEL30 OE 171117 Mansa.eds
Experiment Run End Time	2017-11-17 18:25:33 PM GMT
Instrument Type	steponeplus
Passive Reference	ROX
Well	Sample Name	Target Name	Task	Reporter	Quencher	RQ	RQ Min	RQ Max	Cт	Cт Mean	Cт SD	ΔCт	ΔCт Mean	ΔCт SE	HK Control ΔCт Mean	HK Control ΔCт SE	ΔΔCт	Automatic Ct Threshold	Ct Threshold	Automatic Baseline	Baseline Start	Baseline End	Efficiency	Comments
A1	Uninduced 1	PPP	UNKNOWN	FAM	NFQ-MGB	1	0.823166	1.21482	29.7951	29.7561	0.0431113		2.98314	0.101117			0	TRUE	0.584663	TRUE	3	23	1
A2	Uninduced 1	PPP	UNKNOWN	FAM	NFQ-MGB	1	0.823166	1.21482	29.7635	29.7561	0.0431113		2.98314	0.101117			0	TRUE	0.584663	TRUE	3	23	1
A3	Uninduced 1	PPP	UNKNOWN	FAM	NFQ-MGB	1	0.823166	1.21482	29.7098	29.7561	0.0431113		2.98314	0.101117			0	TRUE	0.584663	TRUE	3	23	1
A4	Uninduced 1	GAPDH	UNKNOWN	FAM	NFQ-MGB				26.9661	26.773	0.16975							TRUE	0.485044	TRUE	3	19	1
A5	Uninduced 1	GAPDH	UNKNOWN	FAM	NFQ-MGB				26.6475	26.773	0.16975							TRUE	0.485044	TRUE	3	19	1
A6	Uninduced 1	GAPDH	UNKNOWN	FAM	NFQ-MGB				26.7053	26.773	0.16975							TRUE	0.485044	TRUE	3	19	1
A7	16h 3	PPP	UNKNOWN	FAM	NFQ-MGB	31.0113	24.6247	39.0543	28.9658	28.9784	0.0114139		-1.97158	0.119826			-4.95472	TRUE	0.584663	TRUE	3	22	1
A8	16h 3	PPP	UNKNOWN	FAM	NFQ-MGB	31.0113	24.6247	39.0543	28.9882	28.9784	0.0114139		-1.97158	0.119826			-4.95472	TRUE	0.584663	TRUE	3	22	1
A9	16h 3	PPP	UNKNOWN	FAM	NFQ-MGB	31.0113	24.6247	39.0543	28.9812	28.9784	0.0114139		-1.97158	0.119826			-4.95472	TRUE	0.584663	TRUE	3	22	1
A10	16h 3	GAPDH	UNKNOWN	FAM	NFQ-MGB				31.1766	30.95	0.20723							TRUE	0.485044	TRUE	3	24	1
A11	16h 3	GAPDH	UNKNOWN	FAM	NFQ-MGB				30.7701	30.95	0.20723							TRUE	0.485044	TRUE	3	23	1
A12	16h 3	GAPDH	UNKNOWN	FAM	NFQ-MGB				30.9033	30.95	0.20723							TRUE	0.485044	TRUE	3	24	1
B1	6h 1	PPP	UNKNOWN	FAM	NFQ-MGB	36.4304	28.0976	47.2345	23.8364	23.835	0.0387705		-2.20393	0.134955			-5.18707	TRUE	0.584663	TRUE	3	17	1
B2	6h 1	PPP	UNKNOWN	FAM	NFQ-MGB	36.4304	28.0976	47.2345	23.873	23.835	0.0387705		-2.20393	0.134955			-5.18707	TRUE	0.584663	TRUE	3	17	1
B3	6h 1	PPP	UNKNOWN	FAM	NFQ-MGB	36.4304	28.0976	47.2345	23.7955	23.835	0.0387705		-2.20393	0.134955			-5.18707	TRUE	0.584663	TRUE	3	17	1
B4	6h 1	GAPDH	UNKNOWN	FAM	NFQ-MGB				26.3018	26.0389	0.230512							TRUE	0.485044	TRUE	3	18	1
B5	6h 1	GAPDH	UNKNOWN	FAM	NFQ-MGB				25.8714	26.0389	0.230512							TRUE	0.485044	TRUE	3	18	1
B6	6h 1	GAPDH	UNKNOWN	FAM	NFQ-MGB				25.9435	26.0389	0.230512							TRUE	0.485044	TRUE	3	18	1
B7	16h 1	PPP	NTC	FAM	NFQ-MGB				Undetermined									TRUE	0.584663	TRUE	3	39	1
B8	16h 1	PPP	NTC	FAM	NFQ-MGB				Undetermined									TRUE	0.584663	TRUE	3	39	1
B9	16h 1	PPP	NTC	FAM	NFQ-MGB				Undetermined									TRUE	0.584663	TRUE	3	39	1
B10	16h 1	GAPDH	NTC	FAM	NFQ-MGB				Undetermined									TRUE	0.485044	TRUE	3	39	1
B11	16h 1	GAPDH	NTC	FAM	NFQ-MGB				Undetermined									TRUE	0.485044	TRUE	3	39	1
B12	16h 1	GAPDH	NTC	FAM	NFQ-MGB				Undetermined									TRUE	0.485044	TRUE	3	39	1
C1	16h 1	PPP	UNKNOWN	FAM	NFQ-MGB	48.5958	39.3325	60.0407	23.4728	23.4397	0.0368748		-2.61962	0.109892			-5.60276	TRUE	0.584663	TRUE	3	17	1
C2	16h 1	PPP	UNKNOWN	FAM	NFQ-MGB	48.5958	39.3325	60.0407	23.4	23.4397	0.0368748		-2.61962	0.109892			-5.60276	TRUE	0.584663	TRUE	3	16	1
C3	16h 1	PPP	UNKNOWN	FAM	NFQ-MGB	48.5958	39.3325	60.0407	23.4464	23.4397	0.0368748		-2.61962	0.109892			-5.60276	TRUE	0.584663	TRUE	3	17	1
C4	16h 1	GAPDH	UNKNOWN	FAM	NFQ-MGB				26.269	26.0593	0.186733							TRUE	0.485044	TRUE	3	18	1
C5	16h 1	GAPDH	UNKNOWN	FAM	NFQ-MGB				25.9108	26.0593	0.186733							TRUE	0.485044	TRUE	3	18	1
C6	16h 1	GAPDH	UNKNOWN	FAM	NFQ-MGB				25.9983	26.0593	0.186733							TRUE	0.485044	TRUE	3	18	1
D1	Uninduced 2	PPP	UNKNOWN	FAM	NFQ-MGB	0.850276	0.655115	1.10358	29.5643	29.522	0.0710437		3.21714	0.135491			0.233997	TRUE	0.584663	TRUE	3	23	1
D2	Uninduced 2	PPP	UNKNOWN	FAM	NFQ-MGB	0.850276	0.655115	1.10358	29.44	29.522	0.0710437		3.21714	0.135491			0.233997	TRUE	0.584663	TRUE	3	23	1
D3	Uninduced 2	PPP	UNKNOWN	FAM	NFQ-MGB	0.850276	0.655115	1.10358	29.5618	29.522	0.0710437		3.21714	0.135491			0.233997	TRUE	0.584663	TRUE	3	23	1
D4	Uninduced 2	GAPDH	UNKNOWN	FAM	NFQ-MGB				26.5592	26.3049	0.223665							TRUE	0.485044	TRUE	3	19	1
D5	Uninduced 2	GAPDH	UNKNOWN	FAM	NFQ-MGB				26.2166	26.3049	0.223665							TRUE	0.485044	TRUE	3	19	1
D6	Uninduced 2	GAPDH	UNKNOWN	FAM	NFQ-MGB				26.1389	26.3049	0.223665							TRUE	0.485044	TRUE	3	18	1
E1	6h 2	PPP	UNKNOWN	FAM	NFQ-MGB	28.161	19.9459	39.7595	29.1452	29.0076	0.124617		-1.83248	0.179223			-4.81562	TRUE	0.584663	TRUE	3	22	1
E2	6h 2	PPP	UNKNOWN	FAM	NFQ-MGB	28.161	19.9459	39.7595	28.9752	29.0076	0.124617		-1.83248	0.179223			-4.81562	TRUE	0.584663	TRUE	3	23	1
E3	6h 2	PPP	UNKNOWN	FAM	NFQ-MGB	28.161	19.9459	39.7595	28.9023	29.0076	0.124617		-1.83248	0.179223			-4.81562	TRUE	0.584663	TRUE	3	22	1
E4	6h 2	GAPDH	UNKNOWN	FAM	NFQ-MGB				31.1672	30.84	0.284311							TRUE	0.485044	TRUE	3	24	1
E5	6h 2	GAPDH	UNKNOWN	FAM	NFQ-MGB				30.6998	30.84	0.284311							TRUE	0.485044	TRUE	3	23	1
E6	6h 2	GAPDH	UNKNOWN	FAM	NFQ-MGB				30.6531	30.84	0.284311							TRUE	0.485044	TRUE	3	23	1
F1	16h 2	PPP	UNKNOWN	FAM	NFQ-MGB	47.1864	34.3161	64.8837	24.6413	24.6514	0.0655953		-2.57716	0.165494			-5.5603	TRUE	0.584663	TRUE	3	18	1
F2	16h 2	PPP	UNKNOWN	FAM	NFQ-MGB	47.1864	34.3161	64.8837	24.5915	24.6514	0.0655953		-2.57716	0.165494			-5.5603	TRUE	0.584663	TRUE	3	17	1
F3	16h 2	PPP	UNKNOWN	FAM	NFQ-MGB	47.1864	34.3161	64.8837	24.7215	24.6514	0.0655953		-2.57716	0.165494			-5.5603	TRUE	0.584663	TRUE	3	18	1
F4	16h 2	GAPDH	UNKNOWN	FAM	NFQ-MGB				27.5392	27.2286	0.279038							TRUE	0.485044	TRUE	3	20	1
F5	16h 2	GAPDH	UNKNOWN	FAM	NFQ-MGB				27.1475	27.2286	0.279038							TRUE	0.485044	TRUE	3	19	1
F6	16h 2	GAPDH	UNKNOWN	FAM	NFQ-MGB				26.9991	27.2286	0.279038							TRUE	0.485044	TRUE	3	19	1
G1	Uninduced 3	PPP	UNKNOWN	FAM	NFQ-MGB	0.81587	0.654953	1.01632	29.0647	29.0735	0.0276076		3.27673	0.114156			0.293588	TRUE	0.584663	TRUE	3	22	1
G2	Uninduced 3	PPP	UNKNOWN	FAM	NFQ-MGB	0.81587	0.654953	1.01632	29.0513	29.0735	0.0276076		3.27673	0.114156			0.293588	TRUE	0.584663	TRUE	3	22	1
G3	Uninduced 3	PPP	UNKNOWN	FAM	NFQ-MGB	0.81587	0.654953	1.01632	29.1044	29.0735	0.0276076		3.27673	0.114156			0.293588	TRUE	0.584663	TRUE	3	22	1
G4	Uninduced 3	GAPDH	UNKNOWN	FAM	NFQ-MGB				26.0192	25.7968	0.195788							TRUE	0.485044	TRUE	3	18	1
G5	Uninduced 3	GAPDH	UNKNOWN	FAM	NFQ-MGB				25.7207	25.7968	0.195788							TRUE	0.485044	TRUE	3	18	1
G6	Uninduced 3	GAPDH	UNKNOWN	FAM	NFQ-MGB				25.6504	25.7968	0.195788							TRUE	0.485044	TRUE	3	18	1
H1	6h 3	PPP	UNKNOWN	FAM	NFQ-MGB	39.6089	30.1424	52.0484	25.0227	25.0342	0.0888122		-2.32461	0.141919			-5.30775	TRUE	0.584663	TRUE	3	18	1
H2	6h 3	PPP	UNKNOWN	FAM	NFQ-MGB	39.6089	30.1424	52.0484	24.9517	25.0342	0.0888122		-2.32461	0.141919			-5.30775	TRUE	0.584663	TRUE	3	18	1
H3	6h 3	PPP	UNKNOWN	FAM	NFQ-MGB	39.6089	30.1424	52.0484	25.1283	25.0342	0.0888122		-2.32461	0.141919			-5.30775	TRUE	0.584663	TRUE	3	18	1
H4	6h 3	GAPDH	UNKNOWN	FAM	NFQ-MGB				27.6204	27.3589	0.229206							TRUE	0.485044	TRUE	3	20	1
H5	6h 3	GAPDH	UNKNOWN	FAM	NFQ-MGB				27.2633	27.3589	0.229206							TRUE	0.485044	TRUE	3	20	1
H6	6h 3	GAPDH	UNKNOWN	FAM	NFQ-MGB				27.1929	27.3589	0.229206							TRUE	0.485044	TRUE	3	20	1
Analysis Type	Singleplex
Endogenous Control	GAPDH
RQ Min/Max Confidence Level	95.0
Reference Sample	Sample 1

## Sheet: Figure 3c
Figure 3c	PR70

## Sheet: Figure 3d
Figure 3d
	SKMEL2 pTRIPZ PPP2RB-MYC Non-induced	SKMEL2 pTRIPZ PPP2RB-MYC Overexpression	DMEM CONTROL	SKMEL30 pTRIPZ PPP2RB-MYC Non-induced	SKMEL30 pTRIPZ PPP2RB-MYC Overexpression	RPMI CONTROL
	1.4463	1.532	0.2211	0.4274	0.3675	0.1044	0.0028	0.0034
	1.314	1.4849	0.2285	0.3512	0.384	0.1102	0.0047	0.005
	1.3772	1.462	0.2288	0.3399	0.372	0.102	0.0041	0.0043
	1.4073	1.4913	0.234	0.367	0.3813	0.0943	0.0054	0.006
	1.4175	1.5764	0.1364	0.3749	0.3653	0.0544	0.0037	0.0031
	1.3124	1.5679	0.1381	0.395	0.3583	0.0501	0.0047	0.0047
	1.409	1.6544	0.1377	0.3943	0.385	0.0561	0.0039	0.0037
	1.4118	1.5445	0.1382	0.4006	0.3941	0.0571	0.0049	0.0054

## Sheet: Figure 3e
Figure 3e	BrDU 24h
		SKMEL2 pTRIPZ PPP2RB-MYC non-induced	SKMEL2 pTRIPZ PPP2RB-MYC overexpression	SKMEL2 pTRIPZ PPP2RB-MYC Cell line control	DMEM	SKMEL30 pTRIPZ PPP2RB-MYC non-induced	SKMEL30 pTRIPZ PPP2RB-MYC overexpression	SKMEL30 pTRIPZ PPP2RB-MYC Cell line control	RPMI
		1.3929	1.5434	0.0436	0.0391	1.2177	1.3232	0.0414	0.0386
		1.2994	1.4484	0.0454	0.0421	1.6029	1.6627	0.0562	0.041
		1.3784	1.4773	0.0477	0.0427	1.7406	1.6554	0.0504	0.0422
		1.1369	1.4873	0.0491	0.0414	1.4663	1.6644	0.048	0.0396
		1.2819	1.4168	0.0423	0.0408	1.5576	1.779	0.0419	0.0379
		1.4144	1.3721	0.0447	0.0418	1.7156	1.7027	0.0452	0.0407
		1.3166	1.56	0.048	0.0426	1.5244	1.6781	0.0487	0.0414
		1.239	1.2628	0.0421	0.0411	1.5049	1.6927	0.0433	0.0393

## Sheet: Figure 3f-i
Figure 3f-i	Incucyte Data		SKMEL2 pTRIPZ PPP2R3B non-induced	SKMEL2 pTRIPZ PPP2R3B non-induced	SKMEL2 pTRIPZ PPP2R3B non-induced	SKMEL2 pTRIPZ PPP2R3B non-induced	SKMEL2 pTRIPZ PPP2R3B non-induced	SKMEL2 pTRIPZ PPP2R3B non-induced	SKMEL2 pTRIPZ PPP2R3B non-induced	SKMEL2 pTRIPZ PPP2R3B non-induced	SKMEL2 pTRIPZ PPP2R3B Overexpression	SKMEL2 pTRIPZ PPP2R3B Overexpression	SKMEL2 pTRIPZ PPP2R3B Overexpression	SKMEL2 pTRIPZ PPP2R3B Overexpression	SKMEL2 pTRIPZ PPP2R3B Overexpression	SKMEL2 pTRIPZ PPP2R3B Overexpression	SKMEL2 pTRIPZ PPP2R3B Overexpression	SKMEL2 pTRIPZ PPP2R3B Overexpression		SKMEL30 pTRIPZ PPP2R3B non-induced	SKMEL30 pTRIPZ PPP2R3B non-induced	SKMEL30 pTRIPZ PPP2R3B non-induced	SKMEL30 pTRIPZ PPP2R3B non-induced	SKMEL30 pTRIPZ PPP2R3B non-induced	SKMEL30 pTRIPZ PPP2R3B non-induced	SKMEL30 pTRIPZ PPP2R3B non-induced	SKMEL30 pTRIPZ PPP2R3B non-induced	SKMEL30 pTRIPZ PPP2R3B non-induced	SKMEL30 pTRIPZ PPP2R3B non-induced	SKMEL30 pTRIPZ PPP2R3B non-induced	SKMEL30 pTRIPZ PPP2R3B non-induced	SKMEL30 pTRIPZ PPP2R3B non-induced	SKMEL30 pTRIPZ PPP2R3B non-induced	SKMEL30 pTRIPZ PPP2R3B non-induced	SKMEL30 pTRIPZ PPP2R3B non-induced	SKMEL30 pTRIPZ PPP2R3B non-induced	SKMEL30 pTRIPZ PPP2R3B non-induced	SKMEL30 pTRIPZ PPP2R3B non-induced	SKMEL30 pTRIPZ PPP2R3B non-induced	SKMEL30 pTRIPZ PPP2R3B non-induced	SKMEL30 pTRIPZ PPP2R3B non-induced	SKMEL30 pTRIPZ PPP2R3B non-induced	SKMEL30 pTRIPZ PPP2R3B non-induced	SKMEL30 pTRIPZ PPP2R3B non-induced	SKMEL30 pTRIPZ PPP2R3B non-induced	SKMEL30 pTRIPZ PPP2R3B non-induced	SKMEL30 pTRIPZ PPP2R3B non-induced	SKMEL30 pTRIPZ PPP2R3B non-induced	SKMEL30 pTRIPZ PPP2R3B non-induced
		0		21.1978	23.9081	22.6172	21.3643	22.7354			18.2326	21.3943	21.7635	32.5444	26.3326	26.4371	22.8576	23.2889	0	12.0776	10.8104	13.585	11.4301	11.7189	10.4693	11.2842	10.435	10.3975	11.2097	9.6737	9.2917	9.31949	9.59735	10.0868	9.40416	9.69797	10.7115	10.5506	9.2127	9.49274	10.9359	11.9835	11.1898	11.4437	9.49347	10.959	10.0863	13.4672	12.0887
		3		24.409	27.7979	25.2059	24.2046	27.5602			19.9208	24.062	25.4749	36.7645	30.2392	27.3879	26.3138	26.1305	3	12.568	10.7584	13.5971	11.256	11.9796	10.2324	11.4728	10.3754	10.2011	11.1979	10.0843	9.72269	9.26097	9.71309	10.4102	9.22207	10.0772	11.1184	10.8129	9.63018	9.67149	10.929	11.7629	11.2869	11.4661	9.78046	10.9101	10.3377	13.7403	11.804
		6		26.5575	29.6381	25.7848	27.3027	28.3881			20.8018	25.6062	26.3072	38.4927	32.4241	25.1968	27.7035	27.3265	6	13.0369	11.3428	14.5775	11.8241	12.3551	10.8483	12.2511	10.7188	10.7677	11.4128	10.5446	10.1058	10.0149	10.1186	10.541	9.35571	10.4886	11.4001	11.3549	9.95247	10.2569	11.7122	12.9184	11.9314	12.2409	10.145	11.4343	10.5471	14.4325	12.347
		9		29.2567	32.9613	28.5233	28.3919	30.5096			22.4572	27.3917	28.5761	40.4769	33.6814	27.4972	29.9382	29.6422	9	13.7993	11.9889	16.209	12.6656	13.1659	11.6073	12.3145	11.6746	11.3613	12.1735	10.7643	10.5861	11.002	11.1549	10.8545	10.0722	10.8655	12.1719	11.4421	10.4194	10.6501	11.9662	13.7879	12.6951	13.0303	10.9174	11.8142	11.2834	15.6892	13.5175
		12		32.0936	37.5184	34.2537	31.8515	35.1094			23.1428	29.6067	29.4197	42.325	35.997	28.8399	31.1225	30.9298	12	14.5505	12.7543	16.8868	13.398	14.3686	12.3694	13.1488	12.3163	12.1857	13.4514	11.7756	11.3254	11.1481	11.3892	11.4168	11.0336	11.4157	12.9855	12.2178	11.0971	11.2061	12.348	14.4368	12.8725	13.8176	11.4329	12.461	12.0191	15.8461	13.6876
		15		35.3742	40.301	36.1637	35.2077	36.9274			25.7319	30.3711	31.794	43.8102	37.4788	30.9826	33.2633	33.2078	15	15.2987	13.046	17.5089	13.7437	15.0246	12.8286	13.9705	12.7167	12.7393	13.989	12.3713	11.9358	11.8495	12.0598	12.6971	11.623	12.0563	13.5752	13.1377	11.5631	12.4878	13.3752	14.8947	13.6639	14.64	12.0877	13.1996	12.9249	16.3406	14.6567
		18		38.1454	42.6982	39.529	37.6353	40.4051			26.6115	33.0114	34.2554	45.724	39.6107	32.4804	35.3449	35.189	18	16.6738	14.6896	19.304	15.0598	15.6877	13.6582	15.1877	13.9396	13.4312	14.7217	12.9223	12.4233	12.4987	12.5584	13.0468	12.3716	13.2229	14.6291	13.8565	11.9725	13.1512	14.5096	15.8787	14.3187	15.8288	13.0848	14.2217	13.2153	17.298	15.4956
		21		39.9025	44.3962	41.1399	39.7133	41.4211			28.0834	35.56	36.8836	48.1215	42.6634	34.8597	37.6222	37.5621	21	17.4719	15.0996	20.3515	15.7076	16.3829	14.539	15.9293	14.7109	14.1437	15.8618	13.6622	13.0663	13.3888	13.5141	13.657	13.0606	14.0017	15.1596	14.7861	13.2472	13.8262	15.3285	16.6904	15.9612	16.6933	14.0017	15.3203	13.9986	18.9648	17.0173
		24		41.7767	46.171	41.2179	41.7847	43.1896			31.2282	37.2374	39.1634	51.109	46.1371	36.987	40.0869	40.3706	24	18.7652	16.1898	21.7239	16.9952	17.9782	15.7108	16.7478	15.8659	14.9763	17.0513	14.4686	13.7501	14.3039	14.3878	14.0401	14.0721	15.0961	15.7277	16.0553	13.6028	14.9165	16.3902	18.1962	16.8293	17.5589	14.7654	16.4071	15.8268	20.1768	17.7834
		27		43.6059	47.7034	42.5054	43.9604	44.5388			33.2411	40.0532	41.9252	53.0323	48.1568	39.3428	42.0257	43.0201	27	20.19	17.1444	23.3541	17.7788	19.4072	16.5923	17.5147	17.173	16.7428	18.4225	15.5021	14.8581	15.3528	15.5886	15.4838	14.8231	15.9855	16.9915	16.9118	14.9513	15.6056	17.1119	19.498	18.5968	19.1768	15.7452	17.7261	16.63	21.8943	19.0623
		30.25		44.5561	48.6979	43.6519	45.3901	45.704			36.379	42.5685	44.6222	55.2316	50.9926	42.3832	46.5055	45.8691	30	21.5789	18.2796	24.9117	18.6898	20.442	17.9446	18.9244	17.3551	17.7827	18.8195	16.5453	15.7578	16.4791	16.055	16.2354	15.6022	16.1326	18.7495	17.0229	15.6245	16.7972	17.9366	20.3911	19.3181	19.692	16.5682	18.2415	17.4856	22.7228	20.2453
		33.25		45.8735	49.116	44.3549	46.3417	46.6765			38.1292	44.5878	46.9658	57.7502	53.6031	44.5901	48.4928	47.8819	33	23.1784	19.7593	26.9564	19.726	22.9993	19.3146	19.4098	19.184	19.3307	20.8451	18.0508	17.2926	17.9254	17.2853	17.3927	16.3132	17.919	20.1033	18.8367	17.2397	18.171	19.6016	21.7816	20.2562	21.5645	17.9492	19.6088	19.8071	24.3877	22.1556
		36.25		46.5499	50.1577	44.3555	47.4447	46.3804			39.9648	47.2261	49.938	60.1076	56.4555	46.5354	50.7144	49.6782	36	25.8631	21.1317	29.4488	21.7758	24.0334	20.4456	21.3953	19.6116	19.9323	21.6893	19.023	18.4628	18.534	19.2585	18.512	16.9758	18.8975	22.182	20.0646	18.4939	20.0012	20.5049	24.4658	22.9879	22.9437	19.3255	20.9789	19.5775	26.9649	23.1514
		39.25		47.0987	50.8952	44.8154	48.5191	47.2324			42.4126	49.3838	51.853	61.7863	58.6968	49.0701	52.4763	52.5839	39	27.8613	21.9615	32.1579	23.3923	25.4164	20.8928	22.5914	21.3319	21.8071	22.7803	20.2053	19.6985	20.8617	20.1357	19.8171	19.129	20.4015	22.9519	22.1145	19.0712	20.9365	22.3076	25.9682	24.3621	24.4138	20.2703	23.2442	20.9858	28.5646	25.683
		42.25		47.8904	51.2358	45.5848	49.2697	47.5547			44.9591	51.8836	54.9692	63.9407	60.8777	50.7319	55.4559	55.2229	42	29.8138	24.0465	33.5529	24.6706	27.4137	22.9681	24.6538	23.2255	23.1148	25.4759	21.4201	20.6045	21.7104	21.9526	21.2142	19.8285	21.6184	24.6855	22.7416	20.4125	22.3787	23.9771	27.4045	26.0451	26.6711	22.2095	24.9714	22.5769	30.4757	27.5032
		45.25		48.0806	51.9677	44.699	49.8963	47.1895			46.2869	54.2779	57.6545	65.9574	62.7918	53.7921	57.7385	56.9285	45	31.9415	26.631	37.0123	27.184	30.8192	24.7877	26.8763	25.5115	24.5617	27.2693	23.8258	22.3469	23.0573	23.1413	22.5324	21.8777	23.6549	27.0799	24.4827	22.3926	24.0427	25.716	28.9895	27.4845	29.1768	24.1171	26.1173	24.543	33.2155	30.012
		48.25		48.8532	52.2301	44.8443	51.11	47.3477			48.8747	56.1172	59.0013	67.8896	65.621	55.7907	59.2927	58.3851	48	34.6313	27.58	40.4921	28.8094	31.6442	25.9917	28.8644	26.966	27.1586	30.3031	24.7304	23.6212	24.0768	24.7015	24.2892	23.171	24.5967	28.3758	26.7997	24.2766	25.6621	27.2275	32.2465	30.0418	31.2613	25.9056	28.8627	26.2201	35.1776	30.7839
		51.25		49.3789	52.6222	45.1437	51.7084	46.9419			50.8323	58.6546	61.2823	69.4062	67.3388	57.8568	60.7244	60.2706	51	36.1161	30.5605	43.3474	31.4322	34.3035	28.3996	31.4425	28.6971	28.3521	31.2946	27.0028	26.043	25.7489	26.2769	25.9055	25.0434	25.9976	30.5327	28.238	26.2094	27.3121	29.7501	35.012	32.4242	33.2614	27.618	29.3115	28.1359	38.5057	34.1303
		54.25		49.8755	53.269	45.3654	52.549	47.3197			52.6188	60.6004	63.2608	71.0412	68.7516	60.1815	63.2924	62.1213	54	39.5227	33.0534	46.8449	33.7567	37.7276	31.4874	33.1478	31.8332	31.4454	34.4691	28.6929	27.4788	28.3234	28.0483	27.7979	26.3913	27.4069	32.2718	30.6123	28.1087	29.8036	31.5013	36.0292	34.1177	36.8983	30.284	32.2361	30.4232	42.0316	36.8586
		57.25		50.8455	53.7359	44.3737	53.9337	46.8238			54.8095	62.5231	65.3562	72.0945	70.0393	62.6752	64.2751	64.6817	57	42.0489	34.963	49.6924	35.3929	39.3166	32.2944	36.0278	32.5864	33.6649	36.857	30.973	29.5392	30.0756	30.3685	29.4659	27.6603	29.3816	35.6795	32.5918	28.967	32.1283	34.782	40.5385	37.1031	39.3529	32.0463	35.596	32.4569	46.1269	40.0195
		60.25		51.5742	53.779	44.7126	54.9049	46.8093			55.3773	64.4304	67.0714	73.9299	71.3337	65.0311	65.8802	66.2237	60	45.2834	39.049	54.2847	40.0191	41.9571	36.4235	38.4717	36.6545	36.3938	39.2137	32.4547	31.6321	32.4535	33.1679	31.522	30.4659	31.5948	36.9455	35.6379	31.6727	35.0993	36.8642	44.2674	40.8922	42.4204	33.9357	38.3316	34.7527	48.4943	44.0938
		63.25		52.4231	54.3938	45.116	56.1855	46.7048			57.0575	65.7148	68.7916	75.5479	73.2422	66.1356	68.0017	67.8437	63	48.2034	41.5188	57.9199	42.4207	46.1599	38.9648	41.5879	37.9341	38.7153	43.3155	35.0003	33.4877	33.91	35.7168	34.3802	32.5947	33.6767	39.4158	36.8357	33.0556	38.0448	39.7282	47.643	44.4758	45.6079	36.9314	41.533	37.6725	52.3626	46.5965
		66.25		52.8932	54.8157	44.422	56.7452	45.9189			58.5562	67.7454	70.097	76.2307	75.0624	68.1213	69.8301	69.5184	66	51.6773	45.2177	61.9105	46.3627	48.9491	42.3861	45.6693	43.2346	42.0583	47.54	38.2974	36.3107	37.4265	37.8517	37.9155	35.777	36.4679	41.9599	40.3449	36.2392	42.2352	43.3174	51.0023	47.1503	49.3827	39.3976	44.1353	41.6957	57.2028	51.6632
		69.25		53.668	55.5312	43.6877	57.5125	46.1163			60.4016	68.8784	71.2852	77.4145	75.7691	69.5287	70.9123	70.961	69	54.9595	49.4494	66.4758	50.5348	52.9404	45.0438	47.7238	45.1824	45.4962	51.16	40.3753	39.1272	40.4318	40.6403	40.4934	38.4089	38.6741	45.288	42.8198	38.2513	44.8284	47.0178	54.654	50.9575	53.2547	43.262	47.57	43.7304	60.1264	54.2959
		72.25		53.7935	55.5237	43.0035	58.3895	45.4293			61.009	70.3421	72.5969	78.3781	76.3494	71.6658	72.2119	71.8977	72	60.0125	52.042	70.1974	52.54	56.8118	48.7832	51.8489	48.2292	47.8601	54.6835	43.575	42.3906	43.249	45.1952	44.4082	41.8553	41.0719	48.4216	46.9943	41.4032	48.4249	50.7901	57.621	55.3025	56.0379	46.2577	52.0004	47.6421	62.6359	58.2314
		75.25		54.9061	55.7421	42.743	59.545	45.4045			62.6197	71.2506	74.1172	79.6085	78.1427	73.7852	74.1021	73.4879	75	63.3107	56.0686	73.3916	57.2223	60.8497	53.0748	55.8088	52.5516	53.4162	58.1971	46.9234	47.0632	47.93	48.434	48.5866	44.8462	45.4252	53.0873	49.9189	43.8705	51.0631	55.7483	63.0548	58.7514	60.4515	50.7366	55.6754	52.0543	68.452	63.3047
		78.25		55.4231	56.3672	42.1572	60.7534	44.7063			63.4749	73.4413	75.9441	80.9648	79.796	74.918	74.8125	74.7319	78	67.6096	59.4861	77.6039	60.8755	65.0677	57.5046	59.1684	54.8751	56.3289	61.9296	48.4003	50.278	51.7227	53.1838	53.0202	48.8062	49.4353	57.2712	54.6514	47.4106	54.5533	59.5922	65.8208	62.6011	65.2708	54.6368	59.8417	56.1672	72.4039	67.0188
		81.25		56.1528	57.1305	41.5904	62.0401	44.803			64.6977	74.5949	77.3267	82.103	81.2362	76.2363	76.1717	75.9892	81	71.6659	62.9129	80.326	64.8996	68.5769	60.0295	63.7797	57.5289	59.1711	65.4868	53.5532	53.2131	55.9727	55.1119	55.377	52.1131	52.3309	60.7496	57.5055	50.8546	58.9915	63.1708	70.7829	67.7347	68.9347	57.7336	63.11	60.0397	75.2498	70.9256
		84.25		57.1799	57.4429	41.7588	63.1637	44.0613			66.2339	76.1509	78.7217	83.3255	81.9907	77.4527	77.8394	77.1577	84	73.2008	67.6978	82.6383	68.3544	71.1411	65.0886	68.0533	61.2787	62.8159	68.8385	55.6739	56.1355	60.5398	58.8312	59.0085	55.0441	55.0983	64.3083	61.3833	55.9462	62.6033	67.4	73.6926	71.8833	72.6472	61.6096	68.5359	62.6366	78.7416	75.1495
		87.25		58.5157	57.2142	41.7379	64.5549	43.8321			67.2805	77.3294	80.5845	84.3018	83.4504	79.2025	79.5157	78.1864	87	77.8691	71.4891	85.4978	71.0999	73.9048	68.3154	70.8687	63.7256	66.2241	70.9435	58.4173	59.605	63.5491	62.5506	62.9	58.7385	58.505	67.3795	65.0662	57.3673	66.3923	68.973	77.5565	74.0567	75.9653	66.5531	71.0539	66.5459	81.8833	78.1898
		90.25		59.7179	57.7781	40.319	65.9368	43.2351			68.0784	78.7058	81.6871	85.8765	84.6896	80.8079	81.0447	79.1413	90	79.1122	73.4231	87.4987	73.8493	76.6936	70.9401	73.4142	66.5494	68.4506	74.6408	62.1518	62.0098	66.5763	65.2157	66.2575	61.8262	61.7075	71.1606	68.4186	61.7263	69.4961	73.2557	80.4343	76.3506	78.1675	68.4634	73.507	69.5318	84.9728	79.7602
		93.25		61.0106	58.4591	40.6501	67.4935	42.8438			69.5746	80.0322	83.3913	86.7002	86.0508	82.4808	82.7786	80.569	93	81.8497	77.5401	89.9808	76.3446	78.8158	73.9701	76.2609	69.813	71.4749	77.2327	64.7985	66.0885	69.5963	68.4652	68.5585	64.4558	63.9256	72.7264	71.6081	62.8904	72.4927	75.8388	82.1205	79.7206	81.0713	71.7469	75.8046	72.157	86.5125	82.9652
		96.25		61.7779	58.8039	39.4404	69.1574	42.499			70.1889	81.3109	85.1749	87.5568	87.5971	83.9361	84.0929	81.5943	96	84.116	79.1471	91.6211	78.9231	81.6105	75.9372	79.5378	72.8928	73.9109	79.6022	67.3401	68.7766	73.0051	71.211	71.2834	67.7931	66.2949	74.9826	74.4228	66.1409	75.5815	78.6144	84.5818	81.1048	83.3715	75.2664	78.9879	75.1673	89.0054	84.9373
		99.25		62.9143	59.5565	39.5743	71.058	42.5542			71.3792	82.9711	86.2122	88.502	89.3257	85.3739	85.5178	83.0456	99	86.4328	81.4919	92.7539	81.5535	83.2468	79.3845	81.4515	74.2619	76.3795	81.8382	68.4925	70.9422	75.5634	74.3406	74.4179	70.3068	69.1138	78.4419	76.5726	69.2375	78.011	81.082	86.277	83.9902	86.4938	78.1313	81.4447	78.0002	90.6816	86.9426
		102.25		63.9762	60.2202	39.2107	72.5025	41.8129			71.9067	84.5089	87.8897	89.6525	90.3404	87.0282	86.7674	84.2783	102	87.8136	83.8118	93.377	82.9937	85.0497	81.9731	83.3436	76.4965	79.252	83.3489	70.9321	73.746	79.2957	76.2078	76.1611	71.8827	71.6407	80.2238	79.883	70.4197	81.0995	82.8284	88.4406	86.5017	87.4727	80.5342	83.8582	80.4709	91.9899	88.9045
		105.25		65.8095	60.6328	38.3917	74.6598	40.9114			72.5272	86.3208	89.1128	90.7159	91.5365	88.5	87.9794	85.8466	105	89.4588	84.7579	94.5252	84.3314	86.0836	84.0334	85.0343	78.2924	81.1026	85.3888	73.5147	76.4869	80.8653	78.5936	78.7906	74.8001	73.6587	82.4681	81.0329	73.05	82.8252	85.3788	89.3227	88.0257	89.5998	82.0268	85.0716	82.1451	92.676	90.2929
		108.25		67.683	61.0626	37.6823	76.2018	40.584			73.5767	87.5224	90.6246	91.7201	92.6181	90.037	89.1393	87.2475	108	90.5206	86.6547	94.9498	85.9843	86.8537	85.4241	86.9131	79.8156	83.0533	86.5589	74.9816	78.1293	82.713	80.3994	80.8461	76.6205	75.3689	83.6987	82.9673	75.5783	84.1967	86.6982	90.7496	89.483	90.6838	84.1011	86.8429	83.8798	93.0828	90.9146
		111.25		69.6139	62.0203	37.1219	79.0563	40.323			74.5559	89.0261	92.0698	92.7805	93.4834	91.6143	90.5345	87.7496	111	91.8206	88.2145	95.4984	87.6843	88.2097	87.4486	88.9647	82.1138	84.522	87.8865	77.4058	80.5008	85.0986	83.2681	82.4735	79.4249	77.8226	85.1419	84.8166	77.0181	85.9443	88.2557	92.1947	91.5234	92.0847	86.2993	87.9428	85.9089	94.1266	92.2778
		114.25		71.1518	62.6589	37.2639	81.9039	39.9837			75.7786	90.4495	93.367	93.6932	94.3478	93.049	91.7116	89.0195	114	92.519	90.2948	96.0722	89.4157	89.2349	88.8191	89.8927	83.2097	87.3658	89.2254	79.7249	83.1384	87.0823	85.1613	84.762	81.9453	80.0129	87.0937	86.8564	78.7568	87.9106	89.7771	93.0047	92.5042	93.1466	87.8472	89.4959	87.7645	94.3565	92.8825
		117.25		73.8221	63.6155	36.3625	84.3479	39.2435			76.8714	91.4364	94.2575	94.5279	95.1781	94.4858	92.49	89.9996	117	93.5885	90.7912	96.1888	89.8769	89.9933	89.8995	90.8776	83.7843	87.5983	90.0621	81.6213	84.6684	88.8133	86.8288	86.6103	83.2323	81.301	88.2357	88.1795	80.4816	89.1969	90.8205	93.4924	93.6672	93.8509	89.1914	90.3249	89.0578	94.6087	93.7331
		120.25		76.0542	64.8981	35.9489	86.6937	38.4755			77.6509	92.4543	95.4962	95.1014	96.041	95.2854	93.6386	91.472	120	93.8871	91.6445	96.5563	90.5302	90.1455	90.8983	91.7284	85.1586	89.2605	90.629	83.3375	85.5582	90.3649	88.7677	88.0249	84.8694	82.8203	90.014	89.4775	81.303	90.0574	91.7913	94.2569	94.3453	94.533	89.6579	90.4642	89.9641	94.9309	93.8237
		123.25		78.2285	66.1881	35.4586	88.478	37.9672			78.4003	93.749	96.4827	96.0314	96.7593	96.3854	94.3914	92.5161	123	94.5456	92.3488	96.7549	90.9895	90.9408	91.4916	92.3838	85.9103	89.5541	91.1408	84.5499	86.1711	91.1181	90.2044	88.9285	86.056	84.1636	90.8851	90.3277	83.169	91.1791	92.2254	94.3523	94.7128	94.601	90.8969	90.7622	90.6158	95.3278	94.4127
																			126	94.7968	92.7266	96.8128	91.1773	91.3424	92.0681	92.7412	86.3213	90.1614	91.3825	85.4663	86.8247	91.8749	90.7516	89.3056	86.2222	85.5554	91.2839	91.2234	84.463	91.0182	92.7032	94.5267	95.141	95.0026	90.4767	91.2285	91.0839	95.6293	94.15
																			129	95.1699	92.8738	96.9831	91.8426	91.8527	92.4087	93.1151	86.6195	91.0433	92.1271	86.266	87.5674	92.2755	91.6386	90.1594	86.9463	85.8308	91.7506	91.8777	84.6498	91.8206	93.0947	94.5484	95.3917	94.9267	91.2755	91.4296	91.1875	96.0616	94.5885
																			132	95.7233	93.7931	97.3501	92.5625	92.4415	93.4774	93.7413	87.5517	91.2049	92.6052	87.1743	88.5745	92.8344	92.6602	90.8941	87.7954	87.0938	92.6079	92.6406	85.6699	92.7027	93.8548	95.1066	95.5561	95.6644	91.6977	92.1927	92.238	96.5872	95.1843
																			135	96.0397	94.5107	97.7471	93.6492	93.6141	94.2661	94.8938	87.932	91.9404	93.373	88.0534	89.2417	93.1706	93.869	91.7609	88.5739	87.9169	93.1911	93.3537	85.8866	93.0563	94.281	95.6677	96.1919	96.2021	92.3695	93.027	92.9131	97.0519	96.3036
																			138	96.7701	95.1067	97.9887	93.9709	94.2623	94.8516	94.9694	88.9332	92.5332	93.5149	88.8723	89.9579	93.8064	94.3921	92.4262	88.7148	89.006	93.7967	93.6075	87.167	93.6335	95.1741	96.2735	96.4825	96.5823	93.2595	93.0832	93.6466	97.0697	96.5766
																			141	97.1266	95.4917	98.4106	94.5064	94.6109	95.3163	95.3515	89.5114	93.0498	93.7428	89.5757	90.5323	94.1496	94.8284	93.0393	89.7392	89.7142	94.0893	93.9906	88.2439	94.5585	95.5458	96.6131	96.8841	96.8525	94.354	93.5101	94.1161	97.5175	97.0214
																			144	97.3286	96.0226	98.5467	95.1114	95.2001	96.104	96.2162	90.3176	94.1552	95.0111	90.1674	91.6098	94.6609	95.4989	93.5139	90.9269	90.9959	94.4853	94.7727	89.0721	94.7679	96.2914	97.014	97.2944	97.345	95.0292	94.7006	94.8346	97.7431	97.5005
																			147	97.5868	96.287	98.8371	95.4997	95.5752	96.5412	96.2889	90.8408	94.3571	95.0066	90.4308	91.6764	94.5873	95.7997	94.0309	90.9045	91.198	94.7759	95.1885	90.2259	95.0383	96.3757	97.4468	97.4043	97.7961	95.2723	95.0171	95.335	98.089	97.648
																			150	98.0475	96.7518	98.9958	95.6764	95.9319	97.0604	96.7712	91.2852	95.0609	95.4161	91.3194	92.6535	95.7933	96.0573	94.6736	91.5936	91.8226	95.4946	95.617	90.9931	95.0461	96.766	97.7392	97.5946	98.1258	95.8531	95.3212	95.6722	98.5317	97.7651
																			153	98.2509	97.1688	99.2534	96.3732	96.3458	97.3619	97.3333	91.736	95.504	96.0283	92.0394	92.846	95.9955	96.3556	95.2046	92.2914	92.2536	95.6764	96.0205	91.795	96.1882	97.3819	98.0218	98.0616	98.393	96.4197	95.7442	96.2026	98.5812	98.1468
																			156	98.33	97.6928	99.4418	97.0888	96.8409	97.5825	97.6681	92.3857	95.683	96.4022	93.1323	93.6326	96.08	96.8448	95.567	92.9735	92.7938	96.4985	96.1949	92.2034	96.5787	97.3924	98.0864	98.1617	98.4917	96.8872	96.0958	96.5238	98.7049	98.3675
																			159	98.4106	97.8418	99.4861	97.2031	97.253	97.8996	97.9469	92.5063	96.1472	96.4888	93.9543	94.1939	96.1203	97.2093	95.9514	93.398	93.7473	97.1016	96.647	92.9936	96.9488	97.8598	98.3733	98.5434	98.7813	97.1928	96.4165	97.0312	98.8985	98.7916
																			162	98.8009	98.3739	99.4673	97.6108	97.316	98.1125	98.1122	93.0983	96.6546	96.85	93.7641	94.5452	96.8996	97.482	95.9782	93.9469	93.9985	97.2924	97.0378	93.5139	97.4804	98.1987	98.6044	98.5554	98.9064	97.6914	97.0275	97.5896	99.1049	98.8942
																			165	98.8021	98.5272	99.5417	97.8875	97.5401	98.3476	98.4527	93.0867	96.9433	97.0512	94.1958	95.1039	96.9897	97.7135	96.4998	93.9994	94.5716	97.6217	97.4192	94.3495	97.6943	98.1787	98.7744	98.8929	99.0707	97.8811	97.0562	97.7367	99.1286	99.0476
																			168	98.7474	98.6417	99.5836	97.7917	97.4592	98.3972	98.7134	93.5189	96.6728	97.4506	94.8415	95.4839	97.2062	97.8415	96.755	94.2307	94.998	97.711	97.6531	94.8238	97.4953	98.4815	98.4774	99.081	99.1752	98.0229	97.024	97.9338	99.177	99.0489
																			171	98.8811	98.9068	99.5824	97.995	97.5899	98.4242	98.7513	93.9034	97.2931	97.7327	95.008	96.0364	97.6107	98.1617	97.1901	94.844	95.1815	97.9097	97.7176	94.957	97.5997	98.34	98.4195	99.1437	99.4805	98.0397	97.2227	98.1907	99.1945	99.151
[truncated: 42 more columns]

## Sheet: Figure 3j-l
Figure 3j-l	Scratchwound		SKMEL2 pTRIPZ PPP2R3B Non-induced	SKMEL2 pTRIPZ PPP2R3B Non-induced	SKMEL2 pTRIPZ PPP2R3B Non-induced	SKMEL2 pTRIPZ PPP2R3B Non-induced	SKMEL2 pTRIPZ PPP2R3B Non-induced	SKMEL2 pTRIPZ PPP2R3B Non-induced	SKMEL2 pTRIPZ PPP2R3B Non-induced	SKMEL2 pTRIPZ PPP2R3B Non-induced	SKMEL2 pTRIPZ PPP2R3B Non-induced	SKMEL2 pTRIPZ PPP2R3B Non-induced	SKMEL2 pTRIPZ PPP2R3B Non-induced	SKMEL2 pTRIPZ PPP2R3B Overexpression	SKMEL2 pTRIPZ PPP2R3B Overexpression	SKMEL2 pTRIPZ PPP2R3B Overexpression	SKMEL2 pTRIPZ PPP2R3B Overexpression	SKMEL2 pTRIPZ PPP2R3B Overexpression	SKMEL2 pTRIPZ PPP2R3B Overexpression	SKMEL2 pTRIPZ PPP2R3B Overexpression	SKMEL2 pTRIPZ PPP2R3B Overexpression	SKMEL2 pTRIPZ PPP2R3B Overexpression	SKMEL2 pTRIPZ PPP2R3B Overexpression	SKMEL2 pTRIPZ PPP2R3B Overexpression	SKMEL30 pTRIPZ PPP2R3B Non-induced	SKMEL30 pTRIPZ PPP2R3B Non-induced	SKMEL30 pTRIPZ PPP2R3B Non-induced	SKMEL30 pTRIPZ PPP2R3B Non-induced	SKMEL30 pTRIPZ PPP2R3B Non-induced	SKMEL30 pTRIPZ PPP2R3B Non-induced	SKMEL30 pTRIPZ PPP2R3B Overexpression	SKMEL30 pTRIPZ PPP2R3B Overexpression	SKMEL30 pTRIPZ PPP2R3B Overexpression	SKMEL30 pTRIPZ PPP2R3B Overexpression	SKMEL30 pTRIPZ PPP2R3B Overexpression	SKMEL30 pTRIPZ PPP2R3B Overexpression	SKMEL30 pTRIPZ PPP2R3B Overexpression	SKMEL30 pTRIPZ PPP2R3B Overexpression	SKMEL30 pTRIPZ PPP2R3B Overexpression	SKMEL30 pTRIPZ PPP2R3B Overexpression	SKMEL30 pTRIPZ PPP2R3B Overexpression	SKMEL30 pTRIPZ PPP2R3B Overexpression
		0	0	0	0	0	0	0	0	0	0	0	0	0	0	0	0	0	0	0	0	0	0	0	0	0	0	0	0	0	0	0	0	0	0	0	0	0	0	0
		0.5	0.252883	0.489748	1.08697	0.268581	0.222519	1.36625	0.776301	0.221692	0.236102	0.631852	0.222026	1.36836	1.45784	1.48159	1.36731	1.07261	1.29844	0.505669	1.15743	0.095838	0.958411	1.29589	5.30655	2.01109	2.26751	0.276873	2.99667	2.30374	1.14707	1.52319	1.13292	2.25145	1.20728	2.10194	2.83298	1.04317	0.584243	2.10339
		1	0.936518	1.25843	1.69897	0.993592	0.88557	2.48887	1.46205	0.891184	1.45905	1.82376	1.1965	2.74334	3.17647	2.69489	2.72256	2.52852	2.67323	1.47276	2.13876	1.2926	2.05154	2.90033	9.87462	2.73187	3.79981	0.712771	4.71507	3.85148	1.76627	3.03447	3.4335	3.1591	1.88309	2.31133	3.58884	1.73034	1.27223	2.83358
		1.5	1.98397	2.22876	3.00402	1.92042	1.61299	3.68477	2.583	2.08975	2.59371	3.11098	2.437	3.97526	4.47295	4.02534	4.0798	3.71555	4.18651	2.59339	3.10548	2.46594	3.92752	4.33106	10.5897	3.46145	4.62209	0.775005	5.31746	4.31048	2.37403	5.05627	4.20253	4.30782	2.34078	3.22313	4.14853	2.6388	2.03663	3.75847
		2	2.94163	3.56932	4.34929	3.1873	2.26822	5.12365	3.81349	3.18571	3.99957	4.47238	3.60984	5.27402	6.02621	5.25612	5.63567	5.27865	5.44354	3.78317	4.42338	4.33389	5.37046	5.68717	12.4457	4.0188	5.22152	1.53957	5.54568	5.11482	3.77311	6.22498	4.50818	5.21635	3.03986	4.09989	5.88796	3.51562	2.71265	4.11631
		2.5	3.98084	5.19195	5.76059	4.61271	3.58752	6.24822	5.12349	4.79998	5.18963	6.13493	4.99103	6.55096	7.20504	6.50127	7.28588	6.60773	6.53883	5.04324	6.36831	6.0023	6.38481	7.10592	14.3565	4.96906	6.48579	2.3264	6.57728	6.95157	4.70925	7.43915	5.64861	6.10153	4.53032	4.81453	6.50642	4.81334	2.70354	4.7717
		3	5.00617	6.93095	7.17807	5.5611	4.45041	7.45505	6.21992	5.77268	6.251	7.32297	6.7313	7.38186	8.61438	7.92598	8.52271	7.63401	7.74799	6.69432	7.34474	7.08189	7.99847	7.93601	15.8322	5.43182	7.01439	2.67104	7.29975	7.74954	5.94211	8.81546	6.30358	7.22343	5.29157	5.21479	6.95897	5.67474	3.56867	5.70214
		3.5	6.11348	8.36516	8.98913	6.58351	5.86355	8.69124	7.1928	7.49948	7.68134	8.57213	8.03865	8.59092	9.90063	9.54898	10.3272	8.89753	8.67953	7.74778	8.36173	8.12623	9.88411	8.9419	16.2366	6.08581	7.89277	3.10339	8.23818	8.41276	5.85397	9.42031	7.35002	7.71983	6.16055	5.86548	7.71468	6.2971	4.12779	6.43833
		4	7.54195	9.46562	10.424	8.00289	6.72944	9.8549	8.72464	8.80989	8.52622	9.94636	9.81257	10.1133	11.228	10.9832	11.5415	10.1358	9.98005	9.38467	9.47158	9.55975	11.7675	9.97819	16.4811	6.76109	9.47274	3.32694	8.96592	9.10048	6.89282	10.396	7.77826	8.23965	6.52773	6.42991	8.03982	7.24094	4.81863	6.06367
		4.5	9.09867	10.8178	11.7959	8.94362	8.25567	10.9203	9.81055	9.97936	9.87948	11.507	11.1434	11.4347	12.698	12.3775	13.0991	11.4597	11.356	11.0166	10.8783	10.9987	12.5393	11.3096	16.9675	7.22864	10.335	4.0704	9.65233	9.73419	8.31777	11.0005	8.57495	9.1968	7.41874	6.59944	8.80628	8.23768	5.02146	6.82962
		5	9.86921	12.1273	13.2017	10.5464	9.14462	12.2859	10.9862	10.7573	11.0582	12.766	12.4159	12.3976	13.6911	13.8187	13.9721	12.5229	12.6049	12.1434	11.6783	12.2083	14.0235	11.8849	18.0895	7.2787	11.4083	4.5731	11.2568	10.5868	9.03829	11.919	9.27759	9.98694	7.95304	6.99538	9.69796	9.18994	5.77065	6.77889
		5.5	11.4199	13.0009	14.329	11.911	10.5823	13.6281	12.1462	11.7288	12.6692	13.7117	13.4152	13.3644	14.3522	15.102	15.1112	13.7141	13.539	13.0737	12.6304	13.6464	15.5651	12.493	19.3843	8.7554	12.2018	5.2628	12.285	11.038	9.86685	12.6121	9.90991	10.7334	8.31334	7.41546	10.282	10.2207	6.32948	7.81926
		6	12.412	14.2272	15.7721	13.1795	11.4386	14.7436	13.2726	12.6916	13.7206	14.8668	14.4555	15.1908	15.4419	15.8188	15.9171	15.0923	15.141	14.0244	13.758	14.4325	16.5732	13.4189	20.48	9.24062	13.1206	4.91805	13.5072	11.5292	10.8444	13.4985	11.2044	11.3785	9.45062	7.92628	10.7916	11.0594	7.2157	8.01798
		6.5	13.5534	15.8316	16.9467	14.1538	12.7369	15.5715	14.6518	14.0329	14.7761	15.9867	15.5343	16.1901	16.7246	16.7819	17.4768	16.6548	16.2205	15.011	15.1438	14.6322	17.4093	14.2965	20.8526	9.81995	13.9598	5.74818	14.0447	12.7584	11.4927	14.4488	12.2493	12.5599	10.2157	8.30877	11.4504	12.0187	8.09169	8.45119
		7	14.416	17.2345	18.5582	15.6667	13.74	16.7152	15.7774	15.2522	15.8328	16.9735	17.3775	17.3547	17.5833	17.5898	18.4749	18.1051	17.4026	15.6683	16.4898	15.551	18.1839	15.4424	21.7947	10.3444	15.5241	6.2099	15.4502	13.06	12.3318	15.06	13.197	13.6708	10.8813	8.7408	12.033	12.7341	8.51142	8.59414
		7.5	15.6484	18.1836	19.7866	16.6976	14.7314	17.7922	16.9341	17.0207	17.2254	17.9638	18.5438	18.415	18.6585	18.6356	19.8014	19.1749	18.6474	16.6376	17.4487	16.4362	19.4047	16.4357	22.3876	10.5206	16.6271	6.68577	15.8165	13.6852	13.3087	15.5447	13.9571	14.2846	11.3216	9.33941	13.3489	13.7712	9.2216	8.86045
		8	16.533	19.4131	20.7325	17.4615	15.8652	18.8525	18.7306	18.6149	18.7593	18.8805	19.9947	19.3551	19.3235	19.0215	20.9513	19.6845	19.4923	17.6288	18.4944	17.127	20.2749	17.3713	23.9585	11.5336	17.6239	6.8452	17.36	14.3404	14.3438	16.7249	14.7979	15.3765	12.2471	10.0938	13.7535	14.7947	10.2429	9.40189
		8.5	17.6996	20.6051	22.5473	18.8614	16.2798	20.0501	19.2039	19.1932	19.6004	19.8196	21.4604	19.9495	19.8123	20.4199	21.8143	21.0571	20.0245	18.3905	19.5904	18.0905	20.6561	18.3169	25.4605	12.1089	19.0374	7.58535	18.5514	15.5907	14.6492	17.1188	15.7507	16.0568	13.0231	10.8909	14.5147	15.8661	10.5853	9.1576
		9	18.096	21.5188	23.4996	19.6909	17.4146	21.5823	20.6063	20.2708	20.3613	20.9939	22.3689	20.4357	20.399	21.3641	22.6435	21.7555	20.6917	19.2119	20.3951	18.7	21.2799	18.9794	25.841	12.6511	20.5638	7.97333	19.2832	16.6185	15.2245	18.0241	16.7319	16.6158	13.9315	11.411	14.6489	16.5973	11.3865	9.6929
		9.5	19.6796	22.3406	24.9553	20.5773	18.1473	22.2662	21.0538	21.1943	21.2812	21.4683	22.9244	21.1308	21.4215	22.4907	23.6721	22.4561	21.4441	19.659	21.7303	19.1698	22.2421	19.5127	27.2779	13.9008	22.1045	8.9239	20.2387	17.2476	16.2481	18.6521	17.8787	17.6509	14.1053	12.3773	15.116	17.7696	11.5463	10.259
		10	20.4783	23.6262	26.0287	21.6531	19.0963	22.5596	22.0456	21.8299	22.1755	22.321	24.063	21.7709	22.2105	23.2714	24.6377	23.2683	21.9642	20.3624	22.6326	19.7166	22.9372	20.029	27.37	14.8892	22.887	9.37027	21.5022	18.2217	16.6666	19.276	19.0486	18.4575	14.9059	12.5201	15.9994	18.6459	12.1621	10.7579
		10.5	21.2907	24.9986	26.8999	22.1776	19.9204	23.6938	23.2866	22.9914	22.9044	23.4611	25.3168	22.3551	22.807	24.1611	25.6085	24.2568	22.8062	21.2206	23.2035	20.4585	23.6045	20.8264	28.6643	15.4984	24.1628	9.88664	22.4111	19.5364	18.1398	20.49	19.8553	19.4545	15.4405	13.1881	16.3101	19.7092	12.6869	10.6357
		11	21.9307	25.7964	27.928	22.8948	21.1143	24.4962	24.3469	23.3851	24.0805	24.2376	26.3282	22.8078	24.1359	25.0306	26.7624	25.0779	22.9971	21.4341	24.3362	21.4156	24.904	20.9275	28.7368	16.2517	25.6478	10.8278	23.3503	20.4963	18.4828	21.7331	21.1112	20.1736	16.0165	13.561	15.6299	20.6256	13.5057	10.8247
		11.5	22.4652	26.1407	28.6882	23.6632	21.975	25.1042	25.2388	24.3725	25.2294	25.0813	27.197	23.511	24.7096	26.2131	27.5513	25.9204	23.2743	22.4526	25.1787	22.4001	25.06	21.2969	29.9868	17.3294	26.4695	11.3377	23.4596	21.7772	19.6597	22.0863	22.3158	20.6564	16.4977	14.2992	16.3205	21.1573	14.4034	11.1612
		12	22.9312	26.8103	29.7392	24.363	22.8198	25.8955	25.3027	25.2533	26.3477	25.7095	27.9432	23.921	25.3486	27.285	28.5466	26.843	23.8306	23.1948	25.6757	22.4638	25.9486	22.742	30.9996	18.179	27.5902	12.0271	23.7478	22.3896	20.1339	23.675	23.6945	21.5098	16.9844	14.6846	16.728	22.2834	15.026	11.4272
		12.5	23.8674	27.8365	30.6038	25.337	23.7217	27.247	26.3953	25.5538	26.9454	26.4367	28.3779	24.3761	25.8793	28.464	29.4618	27.4912	24.5394	23.6506	26.3474	23.2202	26.8861	23.6971	31.4646	19.1601	29.073	12.9489	24.5887	23.1179	20.7515	24.6051	24.3022	22.4023	17.3243	15.023	17.557	22.7735	15.4675	12.2435
		13	24.7379	28.812	31.6386	26.2242	24.485	28.3324	27.0501	26.1862	27.7392	26.721	29.2597	25.1596	26.6287	29.1519	29.7562	28.5595	24.8789	24.6978	26.7804	23.8294	27.7766	24.4173	31.7392	19.5921	29.726	13.7406	25.3074	23.8508	21.6849	24.7702	25.2234	23.5604	18.0478	15.5592	18.0091	23.5892	16.5819	11.9253
		13.5	25.7046	29.3995	31.6584	26.7242	24.7087	29.0345	27.9145	26.8871	28.0957	27.6169	29.7749	25.9624	27.6957	29.5459	31.106	29.2602	25.4715	25.4182	27.3203	24.8913	28.0764	24.4317	32.5565	20.0048	30.9654	14.6099	26.0316	24.4197	22.5239	26.3629	25.8491	24.2692	18.4337	16.149	18.7839	24.5876	17.3425	12.8971
		14	26.4387	30.0988	32.4864	27.3236	25.905	29.8274	28.3613	27.0964	28.6485	28.6503	29.9783	26.6283	27.9233	30.0394	31.4308	29.2092	25.9196	25.1724	27.8742	25.0848	28.7144	24.9406	33.3073	21.1216	31.7151	14.8177	27.1115	25.3133	23.4385	27.0868	26.5565	25.1687	19.406	16.6866	19.3977	25.2925	18.2665	13.4815
		14.5	27.2252	30.6813	33.9053	28.1893	26.9164	30.3443	29.2304	27.7899	29.3255	29.547	30.6952	27.0241	28.3795	31.0642	32.0383	30.1012	26.6487	25.9202	28.7754	25.5447	29.7886	25.2761	33.5335	21.9077	33.3691	15.5055	28.3925	26.53	24.0467	27.6015	27.3026	25.9031	19.1632	17.2371	19.468	26.1517	18.962	13.6322
		15	28.171	30.9251	34.3997	28.4877	27.2581	30.9215	30.0291	28.5621	29.8765	30.4263	31.6621	26.9247	28.9658	31.236	32.5212	30.4325	27.2192	26.0798	29.0021	26.6291	31.0753	25.9278	34.0079	22.3072	34.5161	15.9501	29.4087	27.3276	24.9694	28.3476	28.191	26.1732	19.3826	18.0752	20.5984	26.9883	19.4987	14.3849
		15.5	28.6025	31.7262	34.8503	29.4673	27.4926	31.3847	30.768	29.1457	30.437	30.7555	32.1611	27.188	29.9301	31.6949	32.7065	31.5891	27.8112	26.3552	29.306	27.2027	31.6545	26.6289	34.3056	23.0609	35.9436	16.8117	29.642	28.6764	25.563	29.2644	28.8114	26.4097	19.9233	18.6882	20.7894	27.6764	20.4795	14.7721
		16	29.0795	32.5027	34.9783	29.5402	28.0746	31.8755	31.17	29.9192	30.71	32.0445	32.4367	27.8644	30.5609	32.9914	32.9999	31.913	28.3035	26.87	30.3448	27.8461	32.775	27.3531	35.1956	23.555	37.0707	17.4968	30.1966	29.5328	26.4169	30.5019	30.1209	27.7433	20.5404	19.2577	21.2335	28.3083	21.0017	14.7994
		16.5	29.4911	33.2002	35.3755	30.491	28.8178	32.945	31.9848	30.9308	31.128	32.89	32.5261	28.433	31.5156	33.1514	33.578	32.4849	28.7176	27.0171	31.4976	27.9463	33.5759	27.2946	35.9978	24.7052	37.9588	17.7819	31.1296	30.1696	27.4441	30.5199	30.5811	28.7357	20.8788	19.8007	21.8619	28.9512	21.5252	15.4973
		17	30.4012	34.1398	36.062	31.0207	29.313	33.4008	32.688	31.2591	31.6188	33.9795	32.9804	29.034	32.2616	33.8897	34.214	33.5686	29.2594	27.7439	32.2833	28.5431	34.3834	27.5788	37.5155	25.2573	39.1043	18.2662	31.6232	31.3217	28.5365	31.1184	31.7146	29.6655	21.0179	20.2077	22.2018	29.2544	22.0946	15.023
		17.5	30.9867	34.9811	36.6157	31.5262	30.3144	33.4635	33.5054	32.1865	31.2579	34.1333	33.3305	29.4709	32.423	34.5391	34.6603	33.956	29.8198	28.0042	33.0128	29.1811	35.3106	27.729	37.9712	26.3191	40.5286	18.6166	32.7644	32.1777	29.1323	31.9762	32.435	30.6549	21.383	20.6055	22.9419	29.8357	22.9857	15.2697
		18	31.9095	35.3588	36.9764	31.9164	30.4769	34.2046	34.1794	32.944	32.2475	34.3889	34.0211	30.3599	32.9779	34.3599	35.2484	34.4702	30.679	28.4944	33.573	29.7991	36.3895	28.8151	38.7649	26.417	41.7559	19.5468	33.564	32.7299	29.5709	32.5726	32.9496	31.809	21.9731	21.1896	23.3635	30.9043	23.364	15.7114
		18.5	32.5472	36.3008	37.152	32.552	31.2695	35.075	34.792	33.0243	32.8081	34.5284	34.9985	30.7119	33.1547	35.1471	35.9961	35.2778	31.1377	29.116	33.901	29.809	36.7728	28.811	39.3827	27.5185	42.6606	20.0702	34.419	33.7423	29.8268	32.8531	33.989	32.5808	22.6407	21.8971	23.943	31.7805	23.8198	16.0575
		19	33.4047	36.9011	38.3723	33.4494	30.8235	35.6948	35.2873	33.737	34.0221	35.1086	35.2383	31.1361	33.466	35.7769	36.7752	35.967	31.4348	29.4776	34.4847	30.1562	36.9595	29.3914	39.9186	28.331	43.908	21.3052	35.491	34.3846	30.8107	33.8137	35.055	33.2607	23.2813	22.1583	23.5677	32.6331	24.3058	16.2795
		19.5	33.8567	37.2867	38.6094	34.4765	30.8036	36.3309	35.8881	34.7963	34.3573	36.0545	35.7297	31.9851	34.0415	36.3887	36.9828	36.3674	32.181	30.1025	34.696	29.8999	38.1505	29.5023	40.5637	28.7125	44.8676	21.9487	36.0208	35.8177	31.5528	34.6031	35.0774	33.5797	23.8964	23.0452	23.9525	33.0897	25.0617	16.9502
		20	34.1526	38.318	39.1728	35.4496	31.6596	36.9012	36.6612	35.2283	34.8537	36.8138	36.4258	32.2398	34.4653	36.6098	38.0736	36.629	32.3675	30.1282	35.6819	30.8135	38.1888	29.8136	41.2532	29.4494	45.7899	22.8352	36.7065	36.7876	32.6141	35.6638	35.5686	34.5892	24.4526	23.5509	24.2453	33.5189	25.2592	17.2367
		20.5	34.9887	39.2709	40.5195	36.0412	31.9067	37.7893	36.9345	35.7521	35.4786	37.2544	36.7576	32.7047	34.6975	37.1667	38.3226	36.852	33.2202	30.5569	35.7409	31.6968	38.382	30.2648	41.8349	29.703	46.6396	23.5774	37.4942	37.2273	33.2655	36.1459	36.619	35.0992	24.516	24.0726	24.8084	35.3231	25.5521	17.4766
		21	35.1861	39.4635	41.5411	36.7859	31.9867	37.9194	38.106	36.0347	35.5268	37.5579	36.8641	33.0447	35.2621	38.3312	38.3807	37.4439	34.0395	31.7136	36.4661	32.088	38.9679	31.1037	43.5287	30.6612	47.8496	24.0531	37.9665	37.7485	33.9459	36.9019	37.4159	35.2384	24.977	24.855	25.4284	35.6292	25.5952	17.9674
		21.5	35.5731	40.0232	41.9365	37.1489	32.739	38.6915	38.623	36.6204	35.742	38.0163	37.5038	33.6382	35.2952	38.0152	38.0864	37.948	34.9852	32.2134	37.1198	32.4408	40.1011	31.0321	44.1343	31.3847	48.7722	24.6858	38.7808	38.6942	34.8701	37.3989	38.1398	36.2078	25.3864	25.5384	25.9341	36.1166	26.3981	18.7582
		22	36.2005	40.5331	42.0293	38.035	32.8467	38.6977	38.4255	37.1957	36.8644	38.3275	38.0879	33.9479	36.3228	39.0502	38.4573	38.5184	35.5458	32.8576	37.4364	33.0468	40.1941	31.801	45.162	32.6723	49.9611	25.964	39.3227	39.0713	35.3653	37.9293	39.1911	36.4836	25.7295	25.6608	26.66	36.8449	27.0821	18.6539
		22.5	36.618	41.5918	42.6701	38.1149	33.6433	39.3516	39.4093	37.9601	37.2125	38.9269	39.1104	33.7363	36.449	39.6097	38.1585	38.9104	35.5759	32.757	38.1147	32.9727	41.0941	32.5163	46.1488	32.929	50.5636	26.7936	40.8721	40.1825	36.4025	38.5069	39.7718	37.598	26.0841	26.0642	27.1375	37.6987	27.5708	19.1819
		23	36.9325	41.9895	43.3782	39.0668	34.103	39.8949	40.4375	38.1662	38.4806	39.8602	39.841	34.003	37.0062	40.23	38.9457	38.8227	35.6486	32.9243	37.8076	33.0136	41.6129	33.2455	47.5324	34.2708	51.7813	27.669	41.4969	41.198	37.2199	38.9514	39.8353	38.5174	26.6791	27.1192	27.6312	38.4646	28.3816	19.4109
		23.5	36.9817	43.0416	44.3407	39.5569	34.9934	39.9619	41.2174	38.309	38.4075	40.0891	40.0961	34.5801	37.4747	40.7522	38.8437	39.523	35.6921	33.5534	37.97	33.8301	41.9802	33.4527	48.6527	34.9078	52.625	28.8445	43.2271	41.9934	37.6556	39.6534	40.028	40.2391	27.2907	27.6035	27.6887	38.8903	29.214	20.1193
		24	37.0791	43.4161	44.874	40.8854	36.1992	40.6635	41.2718	38.7941	39.0215	41.4758	39.9946	35.1676	38.1709	40.5666	39.3954	39.9939	36.6289	34.0225	38.1428	34.4094	42.0775	34.1551	49.6326	36.287	54.0044	29.5218	43.9753	43.1373	38.9602	40.9411	40.3417	40.9301	28.0938	28.0953	27.9134	39.8703	29.8235	20.598
		24.5	37.7101	44.3082	45.5621	41.2409	36.3254	41.5285	41.8654	38.8029	39.5741	41.4657	40.7911	35.8674	38.2284	41.4265	40.3867	40.3138	36.9587	34.5589	38.7594	35.5412	42.8524	33.8061	50.0866	37.3343	55.273	30.7861	44.5755	43.804	39.5428	41.4061	41.8597	41.629	28.7104	28.5882	28.4078	40.1936	30.5803	21.1163
		25	37.9843	44.8372	46.21	41.9615	36.4858	41.8858	42.4135	39.8533	39.6339	42.0128	41.5719	36.7364	38.1281	41.8398	40.717	40.4584	37.0652	34.6895	39.1562	36.0006	43.0259	34.6095	50.4114	38.707	56.5209	31.302	45.561	44.8629	39.8276	42.0639	42.5065	42.2437	30.2	29.3173	29.0566	41.47	31.326	21.0417
		25.5	39.0961	46.0388	47.643	42.6995	37.703	41.8053	42.9785	40.5971	40.1807	42.4337	42.1147	37.444	38.5746	42.647	41.2655	41.4138	37.1979	35.7747	39.9524	36.385	43.3428	35.2909	51.5063	39.5096	57.4133	32.3853	46.8529	45.9233	41.0131	42.5199	43.4886	43.321	30.1831	29.8748	28.7273	42.6378	31.6397	21.5334
		26	39.2475	46.6733	48.2443	43.8278	38.4773	42.3419	43.3372	41.4476	41.2293	43.3606	42.9139	37.9044	39.6499	43.4789	42.5809	41.8975	37.7365	36.5107	40.0795	36.2398	43.7073	36.1477	52.2693	40.6123	58.7125	33.0586	47.9885	46.6205	41.1479	42.7563	44.33	44.001	31.07	30.5482	29.676	43.4636	32.6334	21.8897
		26.5	39.5365	47.0747	48.1862	43.1804	38.5606	43.7495	43.9847	41.9544	41.4833	44.0498	43.0985	38.3956	40.124	43.6075	43.7767	43.0332	37.9622	37.3637	40.5221	36.7264	44.592	36.7659	52.8642	41.4074	60.0941	34.1952	48.8484	47.1506	41.7553	43.2605	44.8363	44.6622	31.625	30.4402	30.3538	44.7809	33.2741	22.3702
		27	40.4398	47.3994	48.5963	43.527	38.5789	44.3685	45.1549	42.6854	41.8136	44.5015	43.0741	39.1838	41.1052	44.4016	44.5791	43.7624	38.7653	37.8368	41.1307	37.1626	45.7126	37.5793	53.638	42.8014	61.627	34.7752	49.6532	47.4919	42.5628	44.3766	45.1864	45.3421	32.893	31.0153	31.1525	45.4804	34.1598	22.648
		27.5	40.1	47.6572	49.8838	43.9348	38.7033	44.6358	45.6664	43.0885	42.3774	44.945	42.9901	39.9215	41.1505	45.1596	44.6516	43.2977	39.0885	37.6991	41.9359	37.5992	45.8462	38.0699	54.7506	44.2981	62.675	35.7272	50.4329	48.6559	43.6817	44.8181	46.5217	45.6353	33.2396	31.6644	32.1498	46.508	34.82	23.4265
		28	40.9868	48.7185	51.021	44.3038	39.1713	44.7553	46.596	43.4918	43.3155	44.8525	43.9422	40.5285	41.2519	46.1581	45.0289	44.0369	40.0916	38.1746	42.5778	38.1423	46.6253	38.7136	56.0549	45.5703	63.7151	37.2701	51.4744	49.5973	44.5516	46.151	47.694	46.3656	33.9332	31.9964	32.1248	46.8357	35.4013	23.3687
		28.5	41.3685	49.5423	51.5532	44.526	39.3	45.2851	47.2756	43.5055	44.4588	44.9988	44.6434	40.784	41.479	46.2324	45.7095	44.1895	40.8495	38.6219	43.0419	38.704	46.8108	39.3634	56.9345	46.669	64.864	37.7056	52.0141	50.4727	45.2567	46.5533	47.9576	46.8719	34.8024	32.8228	32.7015	47.6226	36.004	23.5236
		29	41.9662	50.2683	51.7802	45.2773	39.9852	45.8901	48.2542	43.9471	45.443	46.1084	45.2857	41.0218	42.3143	47.2313	46.0776	45.3264	41.6562	38.9062	43.3695	38.6282	47.042	39.7009	58.114	47.2565	66.4377	38.218	52.5608	51.3329	45.4075	46.9424	49.0153	47.7996	35.3355	33.4884	32.6325	47.8922	36.908	23.518
		29.5	42.3191	50.5534	52.6516	45.8772	40.4529	45.81	48.5172	44.0597	46.1249	47.1038	45.1766	41.5179	42.2715	46.9586	46.6167	45.727	42.0508	39.4333	44.1384	39.5524	46.9356	40.1345	59.5673	47.9556	67.4138	39.2417	53.8168	52.1486	45.3496	47.6952	49.3469	48.5094	36.0264	34.1401	32.7499	48.987	37.6293	24.1244
		30	43.2603	50.8867	53.3542	46.221	40.3233	45.8375	49.1265	45.3247	46.9068	47.7202	45.8246	41.9464	42.5346	48.1788	47.2081	45.4498	42.6437	40.0716	44.095	40.8659	47.2894	40.6084	60.4065	49.2959	68.3842	40.6302	55.1714	53.3802	46.576	48.4248	49.7763	49.2181	36.5643	34.5838	33.247	49.3743	38.5187	24.5292
		30.5	44.0587	52.1799	54.1671	47.0537	40.6134	46.1343	49.8881	45.5307	46.7085	47.5874	46.7185	41.9527	43.1721	48.3882	47.6288	46.1693	42.8576	40.1791	44.6491	41.3338	48.1737	41.0429	61.4046	49.8156	69.266	41.8702	55.9102	54.2236	46.7876	49.1384	50.7861	49.5782	36.8003	35.4502	34.193	50.2556	38.9491	24.9803
		31	44.4779	52.0296	54.167	47.5857	41.4704	46.9194	49.9167	46.0588	46.9904	48.6157	47.1167	42.4194	43.2196	48.2266	48.2194	46.892	43.0974	40.5191	45.2275	42.0907	48.6856	41.0148	62.3704	51.4243	70.0796	42.4933	56.5925	54.9131	47.5879	49.7772	52.091	51.4694	37.2737	36.2563	34.3867	50.6402	38.9229	25.6206
		31.5	45.1026	53.0429	55.3462	48.0157	41.7022	47.4357	50.1434	46.3429	47.7426	49.2739	47.8621	42.9995	43.5558	48.6093	48.6018	47.1167	43.3414	41.1528	45.9723	41.8489	49.1421	41.565	62.665	51.8858	71.5147	43.693	57.2914	55.7476	48.1472	50.7242	53.1684	51.9617	37.6937	36.6733	35.5145	50.8045	40.0419	26.3385
		32	46.059	53.3787	56.3546	48.0959	42.1941	47.7889	51.3643	46.9398	48.7987	49.5761	47.462	43.6894	44.6435	49.0576	49.1795	48.5607	44.8079	41.1635	46.7171	42.4699	49.6755	42.4263	64.4352	52.7712	72.059	44.2987	58.3909	57.0919	48.7742	51.4825	53.8945	52.4029	38.4712	37.515	35.4202	52.4564	40.7388	26.6666
		32.5	46.6415	54.059	57.1699	48.4252	42.7353	47.9218	51.4854	47.3576	48.9866	50.4789	47.5072	43.6536	45.1288	49.6758	49.2047	49.2048	45.0975	41.6388	47.152	42.8422	50.3438	43.1133	65.1107	53.2307	73.3435	45.2166	59.3455	57.7881	49.5348	52.2984	54.3173	53.4068	38.8748	38.6193	36.0166	53.0892	41.4372	27.0388
		33	46.9677	54.6962	57.6192	48.657	43.3726	49.2389	51.456	47.9229	49.0597	50.9715	48.2678	44.1039	45.5493	50.0166	49.3293	50.0988	45.4375	41.4648	47.3956	42.8622	50.5581	43.6602	66.2507	53.8816	74.5916	46.1653	60.6385	58.831	50.7359	52.9164	55.6764	54.1895	39.0436	38.9114	36.7655	53.2314	42.7426	27.1671
		33.5	47.7399	55.7767	58.7545	48.9351	43.7193	50.2101	51.253	48.3693	49.9006	51.2142	48.8994	44.6501	45.382	50.8883	50.5951	50.3088	46.3428	41.6387	47.3036	42.9861	51.2201	44.1625	67.7873	55.034	75.563	46.8764	61.1929	59.9517	51.3269	53.8165	55.8142	55.1638	39.221	39.745	37.4291	53.8772	43.2202	27.7916
		34	48.1691	56.7691	59.3762	49.1133	44.4631	51.1159	51.9378	48.8153	49.8943	51.0865	49.679	44.9795	46.5055	51.6574	51.4026	50.3784	46.1179	41.986	47.8574	43.9566	51.3287	44.6098	68.4295	56.1295	76.9232	47.4895	62.0723	61.5192	51.7491	54.8146	56.8015	56.0052	40.2273	40.1463	37.8906	55.0159	44.3441	28.1599
		34.5	48.3507	57.0811	59.4567	49.1928	45.3308	51.9264	52.9767	49.0119	50.6013	51.8603	51.1061	45.452	46.9893	51.8645	52.1459	50.8826	46.9642	42.8313	48.2865	45.1186	52.1279	45.0413	69.32	56.6587	77.9741	48.4726	63.1369	62.0695	52.3839	55.5247	56.6844	56.7348	40.9818	40.8249	38.7014	55.8167	44.8407	28.4366
		35	48.6734	58.7623	60.5258	50.0379	46.142	52.6597	53.0198	50.3202	51.8719	53.3847	52.0756	46.0818	47.4737	52.5269	52.6256	51.4752	47.5229	43.1487	48.8734	45.8105	52.9808	45.2422	69.1243	57.6662	79.1488	49.3444	63.7758	63.0863	52.8221	56.1886	57.1977	57.385	41.6557	41.5604	39.0849	56.3113	45.6606	28.897
		35.5	49.4999	59.3261	59.8701	50.4171	46.6801	53.6489	53.6381	50.9394	52.2379	53.8336	52.6917	46.7488	48.3103	52.792	52.9003	51.6639	47.8548	43.9275	49.7102	46.1134	53.9564	45.7351	70.306	58.6302	80.3744	50.287	64.6619	63.2778	53.5487	56.8873	57.9348	57.8066	41.9994	42.7652	39.5649	56.5254	46.7537	29.4431
		36	49.9779	59.7893	60.2352	51.4552	46.904	54.2305	54.3599	51.9601	52.8135	54.1367	52.8837	47.0261	48.694	53.3426	54.0971	52.0066	48.7089	44.6694	50.4106	46.2762	53.8616	46.4064	70.9981	59.7038	80.9827	51.606	65.7922	64.0996	54.4417	57.7071	58.399	59.017	42.3853	43.4584	40.4565	57.3771	47.3464	29.7663
		36.5	50.238	60.4978	61.0973	51.3022	47.3488	55.0738	54.4472	52.4779	53.8034	54.5461	53.194	47.2261	49.1263	54.0785	54.5318	52.1346	49.052	45.1501	51.6926	46.7699	54.0885	46.4535	72.2327	60.3392	82.1283	52.2692	66.2074	64.979	54.9432	58.2238	59.3534	60.1793	42.8222	44.1719	41.6647	58.348	48.3648	30.7012
		37	50.7185	61.8924	60.9148	51.9928	47.7217	55.7871	54.9796	52.6642	53.674	54.6158	53.8951	47.6224	49.2635	54.9089	55.2783	53.0459	50.2045	45.9567	52.1714	47.0626	54.2512	46.6887	72.6964	61.5804	82.9337	52.9311	67.226	66.1081	55.4426	59.1193	60.4909	60.7076	43.9291	45.228	42.0083	59.4204	49.0971	30.9897
		37.5	51.346	61.9024	62.1015	52.7576	47.9865	56.459	55.7631	52.7428	54.053	55.8656	54.816	48.1994	49.6941	55.3467	55.8132	53.3791	50.7769	46.5825	52.7424	47.4784	55.2282	46.9069	73.9995	61.7712	84.1289	54.0162	68.7131	66.5639	56.0753	59.4117	61.1042	61.8752	44.6452	45.979	42.5982	60.4634	49.8612	32.032
		38	52.1319	62.9245	63.1101	54.0669	48.6136	57.3683	55.9013	52.7931	54.4301	56.4655	55.4894	48.4073	50.0445	55.9028	56.3085	53.776	51.1463	47.2787	52.8534	47.8599	55.4377	47.4983	75.2527	63.0097	84.8907	54.5429	69.6206	67.472	56.9069	59.9149	61.4803	62.9723	45.278	46.9337	42.9757	60.7934	51.1924	32.3128
		38.5	52.5299	63.8711	63.4344	54.5483	49.8625	57.6244	56.8698	54.3142	55.1827	56.0764	56.0161	48.9566	50.7784	57.1846	56.4883	54.1928	52.0275	47.516	52.969	48.1921	55.9944	48.2457	75.7394	63.9269	85.544	55.1495	70.4961	68.2848	57.3355	61.0425	62.2124	64.133	45.3393	47.7047	43.7715	61.8225	52.2831	32.8966
		39	53.2355	63.6656	64.2109	54.9325	49.9409	58.1497	57.928	54.7542	56.2976	56.801	56.5699	49.3401	51.0966	57.9625	57.1273	54.7494	52.7389	48.3724	53.591	49.3295	56.6984	48.1083	76.2532	64.6156	86.2375	56.2273	71.4466	68.7252	57.6671	61.4097	63.2133	65.0375	45.9823	48.5598	44.2797	62.9579	53.146	33.5869
		39.5	54.0607	64.0669	65.1655	54.5801	50.4102	58.5489	58.478	55.4208	57.4282	57.2348	56.8066	49.8554	51.5301	58.1965	58.1805	55.356	53.2469	49.1721	53.8801	49.6279	56.9909	48.3588	77.5639	65.4446	87.2858	56.8271	72.1892	68.9293	58.5392	61.6032	63.7653	66.1577	46.4555	49.433	44.5908	63.91	54.5985	34.3659
		40	54.7272	64.3449	65.1937	55.2302	50.4962	58.4781	59.2944	55.0524	57.8344	57.9554	57.4389	50.1309	51.8968	58.3614	58.6684	55.4546	53.8596	49.4203	54.7947	49.2459	57.0569	48.8024	78.039	66.3019	88.4279	57.7105	73.0279	69.6684	59.1793	62.4483	64.7014	66.8002	47.7731	50.0831	45.2587	64.6463	55.4203	34.8585
		40.5	55.7747	65.1475	65.9559	55.5861	50.814	59.8462	60.2723	56.2605	57.9853	58.5439	57.9631	50.4292	52.4071	59.4398	59.4761	55.928	54.7969	49.7923	55.6175	50.4137	57.4027	49.3929	78.5048	67.4507	89.3719	58.167	74.0197	70.8903	59.4151	62.9694	64.9469	68.0186	48.2378	50.6609	45.8481	65.6837	55.9084	35.5073
		41	56.2603	66.165	66.5354	55.7852	51.3893	60.5074	60.4898	56.9433	58.9056	58.7506	57.989	50.712	52.7007	60.0984	59.9062	55.8911	55.6294	50.1941	56.339	51.1709	58.055	50.4006	78.9308	68.6869	90.2595	59.2835	74.7906	71.6683	60.0427	63.5059	66.9721	68.4902	49.4768	51.5628	46.5473	66.2591	56.6117	35.9584
		41.5	55.8344	66.4909	66.7476	56.5185	51.4819	60.6831	60.6904	57.1446	59.642	59.9624	58.3413	50.6276	52.5291	61.0284	59.9893	56.3325	56.0631	51.0277	56.594	51.5037	59.0996	50.715	79.6714	69.484	91.1642	60.0455	75.4861	72.5647	60.2233	64.2967	67.377	69.3775	49.9293	52.2419	47.275	66.875	57.2767	36.392
		42	56.2905	67.791	67.597	57.6425	51.4093	61.3025	61.0699	57.4051	61.0031	60.3538	59.0338	51.8524	53.1353	60.5048	60.0016	58.1217	56.2331	51.4339	57.5075	52.6406	59.3392	51.1539	80.4706	70.0852	92.1652	61.1849	76.224	73.8745	60.7478	64.6678	68.2065	70.291	49.7502	53.1924	47.925	67.2824	58.1496	37.4354
		42.5	56.7392	69.0766	68.739	57.9852	51.8263	62.0362	61.2497	58.2721	60.4308	60.4832	59.7793	52.2348	53.8	61.9534	60.6839	58.4409	56.6384	52.3275	57.2463	54.2279	60.3441	52.0119	81.148	71.1105	92.5028	61.8683	77.3959	74.3112	61.8475	65.9594	69.2382	71.1752	50.8907	53.8826	48.6855	68.3677	58.8115	38.3518
		43	56.9695	69.8072	68.9034	58.1598	52.5309	63.1051	62.1905	58.6661	61.0381	60.9774	60.1739	52.9151	53.7907	63.2497	61.0572	58.8725	57.502	53.0638	58.1415	54.0004	60.8544	52.259	81.3529	72.4705	92.7808	63.3028	78.374	76.1006	62.2027	66.3821	69.7679	72.0594	51.8367	54.4599	49.4057	68.6929	59.4012	39.2308
		43.5	58.0419	70.4121	69.2485	58.7716	53.3786	63.9165	62.4209	58.9642	62.0544	60.9328	60.8667	53.741	54.7842	64.1787	61.8219	59.2949	57.2171	53.8042	59.2688	54.5024	61.888	52.4967	82.4449	73.0075	93.5615	64.6236	79.3823	76.938	62.8162	67.443	70.6582	72.8411	52.1129	54.8677	50.2105	69.4502	60.2726	40.1726
		44	58.7345	71.0958	70.6993	59.8663	54.2196	64.352	62.3403	59.701	62.0989	62.0176	61.7828	53.6815	55.3085	63.3475	62.1267	59.507	57.8961	54.4745	59.6581	54.8927	61.7395	53.1739	82.8425	74.2024	94.2662	65.8911	80.1919	77.8118	63.547	67.6859	70.6151	73.5924	53.1418	55.8278	51.0245	70.5683	61.4212	41.0318
		44.5	59.7089	72.0837	71.0275	60.5932	54.7627	65.0106	63.2289	60.5724	62.5402	62.9604	61.6726	53.8064	56.0969	64.2934	63.1269	60.1353	58.4695	55.2416	59.9016	55.9187	62.4986	53.2415	83.6951	75.2006	94.6793	66.7175	81.1556	78.7083	64.0874	67.9991	72.6147	73.6278	53.3562	56.5023	52.068	71.4745	62.6442	41.7787
		45	60.1405	72.5899	71.3176	60.4336	55.0233	65.6586	63.67	60.6949	63.3964	63.3665	61.831	54.2309	56.7155	64.8006	63.6738	60.4831	58.5755	55.5468	60.7492	56.1204	63.325	54.0792	84.6632	76.7196	95.2386	67.77	81.6662	79.7078	64.7045	68.9946	73.1734	74.3418	54.7193	57.3628	53.0508	72.6311	63.6683	42.9531
		45.5	60.2247	73.1879	72.4249	61.1524	55.6617	66.1739	63.5168	60.84	64.3651	63.991	62.3733	54.4756	57.0898	65.6281	64.6402	60.8565	58.9109	56.5163	61.9969	56.3958	63.3918	54.2211	85.7919	77.6367	95.5807	69.0859	82.8403	80.5873	65.3561	69.8598	73.5588	74.9371	55.0384	58.1629	53.1704	73.3048	64.7039	43.8875
		46	60.8191	73.7025	72.6992	61.8124	56.5383	66.1514	64.489	61.4918	65.5774	64.0967	63.5598	55.1112	57.4954	66.0724	64.3698	61.8131	59.3664	57.0125	62.2643	56.6339	64.3321	54.7447	86.8974	78.3454	96.1387	70.1447	83.541	80.8756	65.9534	70.1439	74.178	75.9812	55.8447	58.851	54.0542	73.7975	65.3058	44.8655
		46.5	60.7126	73.773	73.7596	62.0349	57.1472	66.1697	66.0541	61.4059	65.6962	64.7773	64.4645	55.1506	58.9636	66.9435	65.0175	62.014	59.6704	57.6344	62.6487	56.5127	64.635	55.2751	87.4771	79.2802	96.523	70.4376	84.2109	81.5935	66.561	70.6063	75.1004	76.9656	57.448	59.7499	53.6136	74.4094	65.9812	45.0673
		47	61.2179	74.4651	74.7978	62.7587	57.9606	67.2026	66.4752	61.9608	66.744	65.1281	65.1756	55.5017	59.3084	68.2669	65.5771	62.8288	60.1108	57.5302	62.93	57.2624	65.628	55.9891	87.8842	79.9272	96.8664	71.0902	84.9917	82.5313	67.5386	71.6317	75.9786	77.6048	58.1668	60.5757	54.5826	74.7682	67.3088	45.6836
		47.5	61.4639	74.5392	74.8641	63.5949	59.1039	67.6635	67.716	62.4494	67.3215	65.811	65.9555	56.1431	60.2127	68.6872	66.1988	63.3023	60.2098	57.9961	63.541	58.2474	66.2828	56.0506	88.6368	80.6698	97.2142	71.936	85.6161	83.288	68.4443	72.1693	76.5271	78.106	58.6985	61.5944	55.0128	76.1891	68.1767	46.1314
		48	61.906	75.0893	75.5936	64.1169	59.9156	68.3748	67.7351	63.0033	67.7071	66.1339	66.8269	56.1877	60.8957	68.8538	66.8803	63.9215	60.611	58.8011	63.8985	58.2735	66.9783	56.5127	89.3141	81.4449	97.6641	72.8986	85.937	83.6939	69.5072	72.6544	77.3169	78.714	60.2653	62.3886	55.6063	77.2909	69.4876	46.6036
		48.5	61.9044	75.9327	76.1862	64.384	60.8463	68.4049	68.2049	63.0348	68.4849	66.5896	68.0668	56.5523	61.4076	70.0913	67.984	64.4407	61.1392	59.2062	65.0182	59.2905	68.0223	57.2209	90.5199	82.6165	97.702	73.9842	86.3445	84.5257	69.8828	73.2874	77.9951	79.5315	61.2149	63.0941	56.0164	77.269	70.7097	48.1431
		49	61.8439	77.8268	76.3947	64.0592	60.8488	69.1608	68.903	63.7738	69.2699	67.3395	68.6289	57.4702	62.0535	70.1157	68.8632	64.8176	62.3366	59.6618	66.3667	59.9297	68.5674	57.4035	91.0635	83.671	97.9322	75.0537	86.9442	85.134	70.8566	74.2389	78.6914	79.8996	61.9297	63.3687	56.6089	78.762	71.8044	48.9466
		49.5	62.7262	78.4573	77.0245	64.8203	61.6922	69.6936	69.8206	64.4854	69.5359	68.2235	69.0687	57.8743	62.9648	70.6592	70.1621	65.2348	62.5667	60.2911	66.7293	60.4904	69.3676	57.8657	91.6887	84.5541	98.1254	76.1437	87.4864	85.8802	71.6794	75.0609	79.5415	80.8949	62.3945	64.3747	57.5545	79.4902	72.6784	49.3476
		50	62.8847	79.1293	77.5396	64.6409	61.9806	70.4279	70.5208	65.2197	70.5407	68.7528	69.5119	57.2725	62.8991	70.6128	70.0539	65.6603	62.7431	61.1485	66.9124	61.4956	70.0983	58.7965	92.0324	85.4743	98.177	76.573	88.1029	86.5865	72.0435	75.9772	80.6579	81.9432	63.4632	65.2631	57.5898	79.7833	73.4839	50.8283
		50.5	64.0773	80.4154	78.7099	65.1634	61.6322	71.0116	70.8014	65.809	70.5952	69.7924	70.2009	57.5699	64.0555	71.186	70.8037	66.6443	63.8019	61.7013	67.4415	62.2734	70.8581	59.0191	92.4078	85.6197	98.5071	77.5046	88.8693	87.1454	72.8146	76.6483	81.368	82.3743	64.4101	65.8675	58.2948	80.8459	73.9773	51.2234
		51	65.0371	80.7494	79.4171	66.3298	62.2221	71.8302	71.2698	65.9744	72.0087	70.0544	71.173	58.042	64.0708	72.1829	71.5488	67.1484	65.1707	62.8834	68.8619	62.9657	71.7282	59.9669	92.9052	86.4118	98.4096	77.9873	89.3897	87.5763	73.9167	77.3335	82.1989	83.3744	65.3206	66.4706	58.3705	82.0745	75.3979	51.7903
		51.5	65.7612	81.6947	80.5662	66.7686	62.9846	72.3738	71.8207	66.7631	72.6027	71.02	71.8699	58.7225	65.1632	73.114	72.1204	67.5355	65.4845	63.8284	69.6443	62.8302	72.311	60.3297	93.4214	87.0063	98.6634	78.6205	90.0645	87.7823	74.6308	78.2377	82.938	84.0275	66.2711	67.2496	59.1482	83.3115	75.5414	52.4441
		52	66.4204	81.6119	81.1598	67.9843	63.4033	73.4411	73.0508	67.9261	73.066	72.148	72.4033	58.995	65.7618	73.7049	73.0053	67.9121	66.4879	64.1376	70.0492	63.0714	73.0585	61.2666	94.0088	87.5901	98.8443	79.5579	90.4075	88.3958	75.2434	79.0662	83.5513	85.1759	66.4446	67.7463	60.302	84.2322	76.6249	52.834
		52.5	67.2898	82.2923	81.8533	69.399	63.8503	74.557	74.1849	68.5466	74.2109	72.5182	73.4823	60.6893	66.7219	74.7601	74.6795	68.8743	67.3646	64.9905	70.5858	63.8633	74.1864	61.9393	94.3191	88.6214	99.2051	80.394	91.0708	89.0631	76.4736	80.438	84.6892	85.8498	67.7975	68.8248	61.4597	85.56	77.8372	54.2566
		53	67.0885	82.7284	81.6922	70.1351	64.4789	75.6771	75.2343	69.2699	75.0668	72.2385	73.6168	60.4716	67.6058	74.9003	75.1281	68.5523	68.2898	65.4843	71.3667	64.3412	74.6919	63.0532	94.435	89.4275	99.1593	81.0347	91.1727	88.9719	77.1826	80.8545	85.1259	86.3334	68.2054	69.3117	61.6983	85.692	78.5613	53.9177
		53.5	67.731	83.2592	81.8662	70.5801	65.0407	76.072	75.1841	69.5588	75.8474	73.0737	73.6973	61.3415	67.9563	74.9381	75.6471	68.6094	68.6563	65.9099	71.1965	64.6257	74.8248	63.4028	95.3112	89.8404	99.2423	81.7519	91.3592	89.3383	77.7322	82.1155	86.4247	87.0092	68.6143	70.2502	61.6481	86.0974	79.3672	54.3296
		54	68.4876	83.7713	82.7409	71.1043	65.2894	76.7679	76.1014	69.9874	76.7932	73.6619	73.7446	61.9825	68.1541	75.3285	76.0823	69.4832	68.9827	66.3304	72.0266	64.6226	75.5717	63.8937	95.5322	90.6422	99.1352	82.4115	91.7976	89.4652	78.7127	82.7364	87.1578	87.7619	68.9568	70.6697	62.3669	86.5645	79.9473	54.6483
		54.5	69.1219	84.6808	83.7649	71.3857	65.8873	77.6433	76.2859	70.5116	76.823	73.8559	74.5886	62.8703	68.8563	75.9869	75.9271	69.9803	69.862	66.798	72.6998	65.0247	76.1014	64.7873	95.928	90.9285	99.2818	82.7746	92.1691	89.8784	79.4873	83.3424	87.8473	88.2335	69.567	71.5005	62.229	87.6289	81.1401	55.4843
		55	69.8077	85.4435	83.5345	72.3969	66.8036	77.9979	77.1533	71.3419	77.1325	74.6201	75.2636	62.9065	68.6594	76.3712	75.8316	70.3843	70.0016	67.3332	72.8714	65.5923	77.2425	65.3768	96.3669	91.734	99.4198	83.1701	92.6137	90.314	80.4541	84.3231	88.0658	88.7839	70.0652	72.3627	63.3123	88.0072	81.8255	56.0784
		55.5	70.5221	86.1192	83.7932	73.1707	67.5508	78.3268	77.8104	71.5663	77.6118	75.0593	76.1376	63.1559	69.3414	77.1925	76.752	71.2522	70.1212	67.2779	73.737	66.1356	77.878	65.7131	96.5404	91.9366	99.4483	83.8615	92.8588	91.2821	81.1664	84.8767	88.7713	89.1431	71.3858	72.8837	64.111	88.8883	82.19	57.0434
		56	70.9975	86.586	84.2582	73.7262	68.9562	78.7799	78.5551	72.2694	78.2518	75.9486	76.7244	64.159	70.3981	77.7615	77.1175	72.07	70.1087	68.5343	74.2336	66.3978	78.0981	66.1733	96.7074	92.7461	99.5061	84.7179	92.9944	91.359	81.545	85.4684	89.5931	89.3584	72.6838	73.528	64.7999	89.307	83.196	57.7274
		56.5	71.4423	87.0374	85.3054	74.1499	69.109	79.6993	79.0721	72.622	78.9366	76.0176	77.2044	64.5931	71.1791	78.3793	77.7091	73.0072	70.8673	69.0672	74.3245	66.7445	78.3419	67.6658	97.1025	93.3579	99.525	85.6508	93.2971	91.8023	81.7354	86.2525	89.8933	89.9303	73.3173	74.5589	65.5013	90.2078	84.1028	58.2546
		57	72.111	87.3262	85.8543	74.6671	68.8814	80.4891	79.5957	73.7997	79.6199	76.7991	77.4811	65.4402	71.788	78.664	78.1778	72.9214	70.9544	69.619	74.5265	67.4301	78.8182	67.929	97.361	93.2521	99.4971	86.422	93.4153	92.1839	82.3183	86.3412	90.531	90.1497	74.5115	75.2473	66.1362	90.6075	84.8144	59.2935
		57.5	72.6152	87.6031	86.1673	75.58	69.6308	80.9177	79.8327	75.2341	79.9441	77.5685	77.9869	66.2865	72.7994	79.7522	78.7492	73.1967	71.8859	70.2746	74.5469	68.417	79.9876	67.8184	97.6445	93.7418	99.5055	87.3316	93.6809	92.4569	82.8337	86.734	90.9091	90.5694	74.8441	75.5383	66.751	90.9773	85.0451	59.7573
		58	72.371	87.9985	87.4384	76.0969	69.972	81.6333	80.3307	76.2263	80.4883	78.0291	78.4568	66.2865	73.6168	80.1371	79.9154	74.3869	72.0576	70.816	75.3907	68.5933	79.6463	67.8556	97.6643	94.2357	99.3621	88.1711	93.7021	92.7644	83.3995	87.3747	91.1559	90.9896	75.7451	76.193	67.3768	91.3916	85.1586	60.6274
		58.5	72.7181	88.7136	87.7433	76.8216	70.0597	82.2387	81.2464	76.5866	81.0398	78.5444	78.9921	66.7427	74.4723	80.6671	80.1592	74.5909	72.2513	70.6784	75.8386	69.2355	80.4443	69.5312	97.9912	94.6915	99.5654	88.6078	93.9865	93.1953	84.4621	88.2117	91.5328	91.0185	76.3327	77.0559	68.3119	91.8074	85.8883	61.2444
		59	73.5251	89.4988	88.3818	77.6354	70.9843	82.3699	81.3584	76.9343	81.1928	79.2768	79.2541	66.9858	74.2019	80.995	80.7749	75.2205	72.969	70.7125	75.7971	69.7663	81.2503	69.8892	98.0825	94.96	99.6058	89.1061	94.1709	93.6534	85.1706	88.4345	91.9297	91.5329	77.2967	77.3866	68.9967	92.0504	86.2377	62.0868
		59.5	74.2033	89.6594	88.684	77.7596	71.0271	83.4153	81.8672	77.3533	81.3572	79.7706	79.8544	67.3572	75.2013	81.6414	81.4268	75.3742	73.6192	71.1908	76.2088	70.5603	80.9798	70.5901	98.4176	95.6052	99.7131	89.5976	94.4098	93.8983	85.974	88.9373	92.3225	91.4537	77.7032	77.9742	69.3499	92.4663	86.9113	62.7098
		60	74.9373	89.8329	89.1901	78.0262	72.0728	83.544	82.5564	78.0421	82.0073	80.5179	80.7105	68.1984	75.8234	82.0361	81.8601	75.6829	73.9962	72.2006	76.6525	71.0626	82.0205	71.4748	98.7283	96.3849	99.595	90.1508	94.4735	94.2255	86.5489	89.5465	93.0342	91.5677	78.4145	78.4467	69.7169	92.5324	87.2319	63.2717
		60.5	75.6762	90.5803	89.4678	78.6047	72.6232	84.2663	83.1645	78.5345	81.9734	81.0116	81.2502	68.59	75.7251	82.8342	81.6097	76.2743	74.4771	72.8508	77.2038	72.1307	82.891	71.6777	98.8185	96.3637	99.7415	90.676	94.5559	94.3821	87.3064	89.9491	93.2985	91.6808	78.7306	79.2262	70.2741	93.1559	87.9357	63.7028
		61	75.943	91.4625	90.1886	79.397	72.8542	84.7536	83.4664	79.4572	83.0392	81.6851	81.969	69.1533	76.6993	83.4604	81.753	76.8452	75.0516	73.5236	77.3265	72.7569	83.5391	72.4029	99.0206	96.5815	99.8485	91.2276	95.0533	94.363	87.4408	90.3902	94.0071	91.8556	79.1575	79.8811	71.0713	93.7103	88.6695	64.7172
		61.5	75.7306	92.0432	90.2668	79.463	73.5014	84.7216	83.9897	80.2107	83.3561	82.3421	82.6021	69.7274	77.3293	84.5345	81.8827	77.2163	75.2831	73.4714	78.183	73.1913	83.9716	73.0445	99.034	96.7714	99.7107	91.8521	95.4422	94.4147	87.9624	90.7585	94.3386	92.2065	79.0217	80.8484	71.5872	93.9969	89.1556	64.8643
		62	76.2644	91.9274	91.0299	80.0251	73.3269	85.2774	84.3003	80.2878	83.9866	82.9188	83.5023	70.0675	77.6674	85.4124	82.4507	77.5558	75.6753	74.1512	78.4489	73.5308	83.9697	73.8503	99.0205	96.9832	99.5844	92.2429	95.6245	94.6338	88.6143	90.8736	94.3799	92.3685	79.6563	81.0541	72.281	94.3443	89.9007	66.4026
		62.5	76.9668	92.2299	91.7311	80.691	74.2918	85.2839	84.9932	80.369	84.4903	83.5718	83.6071	70.4111	77.7416	85.6176	82.9783	77.7688	75.8565	74.3837	78.2123	73.9852	84.1673	73.7259	99.2603	97.1156	99.6496	92.6295	95.7977	94.7402	89.0237	91.4654	94.8578	92.3055	80.1837	81.4242	72.9457	95.1002	90.5628	67.1008
		63	77.2715	92.9699	91.7723	80.7918	74.7947	86.1134	85.8936	81.3893	85.137	83.9238	84.2984	70.7809	78.2888	85.6873	83.4536	78.18	76.1362	74.8334	79.2784	73.93	84.2356	74.3312	99.4362	97.1913	99.6966	92.9979	96.0984	94.6954	89.3807	91.5939	94.636	92.5011	80.6051	81.7745	73.3383	95.0449	90.9676	68.0211
		63.5	78.2901	93.0828	92.3998	81.6024	74.7024	86.8587	85.7994	81.8354	85.497	84.1527	84.9036	71.1	78.8358	86.2524	84.0501	79.4032	76.4079	75.5135	79.8033	74.4974	84.7163	75.0306	99.5257	97.3943	99.6425	93.3482	96.3882	94.7202	89.9131	92.1357	94.6578	92.8416	80.8076	82.0025	73.9229	95.4051	91.3701	68.5452
		64	79.5209	93.695	92.498	81.9673	75.6044	87.3164	86.4062	82.2482	85.9231	85.0628	85.327	71.8327	79.3224	87.2867	84.5945	80.1876	77.0113	75.9313	80.433	75.184	85.2641	76.015	99.6307	97.4642	99.6031	93.8686	96.6906	94.8848	90.4847	92.635	95.0617	93.2483	81.2359	82.8844	74.5602	95.6097	92.4583	69.3753
		64.5	79.7202	94.0731	92.4442	82.1585	75.9617	87.6361	87.2971	82.8394	86.6793	85.1862	85.6248	72.5354	79.5475	88.0538	85.2854	80.4186	77.6993	76.5401	81.0708	75.8543	85.8889	76.8805	99.669	97.558	99.761	94.2041	96.6905	95.0008	91.1267	93.243	95.2392	93.4329	81.6262	83.0142	75.3946	95.8484	92.9227	70.7476
		65	80.1207	94.1446	92.852	81.993	76.2574	88.2273	87.3538	83.2375	86.7263	86.0091	85.5934	72.3295	79.2356	88.1945	85.486	80.9573	77.6043	76.5893	81.4249	76.2092	86.1887	77.7171	99.725	97.9094	99.8335	94.5464	97.023	95.1589	91.5683	93.2494	95.6568	93.6099	82.0578	83.3664	75.8573	95.9905	93.1783	71.291
		65.5	81.0225	94.7564	93.3671	82.7617	76.8563	88.472	88.1056	83.9005	87.0426	85.9482	86.3447	73.0693	80.2956	88.4788	84.9813	80.8271	77.8867	76.5896	82.0579	76.4129	86.5707	78.1491	99.8007	97.7156	99.7392	95.0536	97.1153	95.1777	91.6192	93.8464	95.7035	93.7191	82.2434	83.7562	76.8437	96.2469	93.1932	71.6237
		66	81.8684	94.9273	93.6289	83.1685	77.3216	89.0884	88.5414	84.5919	87.3598	86.6797	86.703	73.7132	80.8127	88.4516	85.0553	80.9862	77.8658	76.5954	82.9458	76.6376	86.8242	78.6117	99.8791	97.9768	99.7863	95.4735	97.2353	95.3637	92.0673	93.9585	95.9024	93.8659	83.1931	84.3637	77.1041	96.6713	93.3622	72.1982
		66.5	82.8074	95.1748	93.4486	83.4252	77.7828	89.8225	88.6884	84.7154	87.8378	87.4354	87.4148	74.2492	81.6367	88.9901	85.3637	81.3981	78.3204	76.9738	83.2147	77.4039	86.944	79.0168	99.8737	98.0835	99.8574	95.9578	97.3614	95.3709	92.3681	94.5299	96.1043	93.9101	83.8313	84.7353	77.8388	96.825	93.8075	72.8508
		67	83.565	95.5158	93.9648	84.1637	78.1798	90.3226	89.049	85.3349	88.7456	87.7923	87.9094	74.5362	81.5097	89.7884	85.723	81.917	78.4155	77.3226	83.7308	78.0608	87.3266	79.4463	99.9334	98.1181	99.8334	96.6031	97.5247	95.347	92.3981	94.8505	96.2646	94.3689	84.5699	84.9999	78.5476	97.2751	93.7585	73.7229
		67.5	84.2959	96.1743	94.1301	84.5459	78.5735	90.588	89.4994	85.8574	89.1739	88.0432	88.1085	74.8945	82.0793	89.9007	85.9313	82.2094	78.5673	77.6054	83.7201	78.5452	87.7636	79.8374	99.9067	98.4926	99.9487	96.6947	97.5517	95.6245	93.214	95.0714	96.6975	94.4644	85.4605	85.8875	79.2966	97.4282	94.1918	74.6718
		68	84.7722	96.3732	94.292	84.3009	78.9403	90.6156	89.5326	85.9273	89.1133	88.0433	88.4894	75.3559	82.7754	90.0979	86.3731	82.132	79.2361	77.7322	84.4185	78.9011	88.6246	80.5329	99.9661	98.6573	99.8405	97.095	97.5865	95.9536	93.0629	95.3503	96.7651	94.5702	86.1563	86.4018	79.7438	97.4695	94.4874	75.1706
		68.5	85.1615	96.4938	94.7781	85.0246	79.6228	90.9606	89.7773	86.5032	89.3342	88.7204	89.0738	75.5296	83.0557	90.6941	86.8528	82.8534	80.1129	78.202	84.7141	79.3081	89.0655	81.2075	99.8976	98.7181	99.8328	97.4464	97.7199	96.2257	93.6565	95.4649	97.1613	94.6482	86.4926	87.0905	80.0778	97.8624	94.6672	76.3744
		69	85.1977	96.8134	95.0125	85.1468	80.3141	91.191	90.3055	86.9788	90.2383	88.8983	89.3837	76.3485	83.9561	90.8401	87.0894	83.1304	80.5197	78.78	84.7654	79.9553	89.1278	81.2958	99.9218	98.9192	99.7756	97.7281	97.7246	96.3447	93.7136	95.5128	97.6592	95.1211	87.0289	87.6052	81.1521	97.9206	94.7332	76.8402
		69.5	85.4433	96.8128	95.2888	85.4598	81.0034	91.7648	90.4713	87.439	90.3681	89.3465	89.7767	76.9358	84.3907	91.278	87.29	83.6693	80.6236	79.1593	85.0626	80.2805	89.2091	81.6479	99.9932	98.9753	99.8675	97.8564	97.8414	96.532	93.9309	95.7166	97.7239	95.33	87.2261	88.2465	81.1044	98.0408	95.021	77.5606
		70	86.0831	96.8298	95.4123	85.9144	81.6361	92.0669	90.9275	87.51	91.0213	89.6563	90.1169	76.9816	84.4778	91.6002	87.2731	84.035	81.2506	79.7156	85.4463	80.714	89.666	82.4869	99.9601	99.174	99.7425	98.0683	97.788	96.5905	94.1212	96.2784	98.0139	95.3794	87.2795	88.3924	81.8108	98.2581	95.5477	78.2048
		70.5	86.1946	97.0991	95.7299	86.3486	82.1909	92.4982	91.3348	87.5526	91.4656	89.8375	90.5747	76.7615	84.5458	91.7457	87.5366	84.1328	81.4553	79.8381	85.6765	81.1596	90.4007	82.8539	100.014	99.3149	99.7702	98.2237	97.8261	96.5697	94.2544	96.1593	98.1138	95.6565	87.7876	88.591	82.9345	98.4498	95.6008	78.9742
		71	86.6227	97.3557	96.2145	86.9236	82.7385	92.3946	91.445	88.0408	91.9275	89.9534	90.787	77.4007	85.1076	92.2209	87.9597	84.4019	81.7945	80.2575	86.4325	81.3408	90.5498	83.4613	99.9575	99.4203	99.7014	98.3049	97.9886	96.7934	94.856	96.4049	98.2769	95.7374	88.4032	89.1412	83.3857	98.7244	96.0428	79.62
		71.5	86.6401	97.4381	96.1297	87.3305	82.9495	93.169	91.9136	88.3656	91.5717	90.0977	90.7036	78.2766	84.9868	92.6432	88.2101	84.9888	82.4497	80.475	86.1971	81.602	90.5042	83.5877	99.978	99.4906	99.8364	98.4813	98.1834	96.8935	94.9873	96.6001	98.2826	96.0237	88.5962	89.6845	83.5901	98.9051	96.3836	79.8046
		72	87.1679	97.6046	96.5909	87.7697	83.7244	93.3973	92.0187	88.6705	92.0765	90.5635	91.2779	78.8645	85.4743	93.3842	88.5776	85.5091	82.8009	80.9048	86.7092	82.5348	90.8293	84.0376	100.002	99.4917	99.8945	98.5585	98.5294	97.153	95.4591	96.9156	98.5465	96.189	89.2666	90.3993	84.1938	99.003	96.3748	80.4319
		72.5	87.8517	97.6667	96.8634	88.3595	83.8931	94.0101	91.9688	89.283	92.1445	90.778	91.982	79.1554	85.746	93.564	88.8228	85.7741	82.6455	81.1884	86.9207	82.6578	91.1446	84.7412	99.9805	99.4811	99.9243	98.82	98.4851	97.2034	95.6124	97.2437	98.4296	96.2691	89.4193	91.0601	84.7343	99.0794	96.8062	80.5679
		73	88.3227	98.188	97.1057	88.5701	84.5155	93.8666	92.4089	89.7469	92.6498	90.8415	92.4801	79.5746	85.9113	93.9292	89.1843	86.2997	83.3526	81.6814	87.5371	83.4879	91.609	84.8478	99.9889	99.6091	99.8542	99.0059	98.5671	97.3051	95.9609	97.3495	98.3822	96.5632	90.072	91.2721	84.8096	99.0777	97.2038	81.2383
		73.5	88.5371	97.9997	97.3436	88.8829	84.8514	94.1988	92.6847	90.3015	92.6707	91.0617	92.7918	79.9445	86.766	94.0578	89.2873	86.4409	83.5431	81.7337	87.974	84.168	91.6577	85.2484	99.9906	99.7012	99.8783	99.0538	98.6685	97.4002	96.1849	97.6358	98.4266	96.8827	90.6903	91.4977	85.5865	98.9606	97.386	81.9588
		74	88.7278	98.1431	97.5924	89.4254	85.4325	94.3025	92.8203	90.9233	92.9144	91.3086	93.083	80.8357	87.4569	94.3301	89.5955	86.3459	83.4544	82.268	88.3018	84.0051	91.9971	85.8276	99.9919	99.776	99.9516	99.1333	98.6905	97.4951	96.5503	98.0495	98.603	96.9522	90.819	91.8754	85.6384	99.1162	97.0584	82.7585
		74.5	89.3617	98.3507	97.7797	89.9497	85.9104	94.6807	92.7641	91.0763	93.1148	91.4386	93.2212	81.2978	87.8103	94.6671	89.7296	87.2053	83.5634	82.4767	88.495	84.536	92.2628	85.9056	100.002	99.8371	99.9704	99.1704	98.7919	97.5207	96.8221	98.3081	98.4793	97.0351	91.4839	92.2789	86.4302	99.2228	97.4678	83.3163
		75	89.5403	98.4881	97.8608	90.1108	86.203	94.8552	92.8961	91.6601	93.6383	91.9236	93.3307	81.4312	88.1916	95.1792	90.183	87.0421	84.3334	82.4706	88.694	84.8869	92.5917	86.2407	99.9894	99.9067	99.9539	99.3068	99.0919	97.5959	96.7615	98.2793	98.6582	96.8587	91.9845	92.7921	86.5928	99.3812	97.8014	83.4412
		75.5	90.0362	98.5874	97.9274	89.9625	86.7791	95.0841	92.8198	92.0235	93.8737	92.6675	93.5641	81.9593	88.3162	95.18	90.0217	86.9845	84.4787	83.0011	88.7031	84.9805	92.9446	86.5939	99.9847	99.8751	99.9846	99.4047	99.1527	97.6626	97.0027	98.6129	98.5281	97.0362	92.3374	93.261	86.8449	99.2959	97.8106	84.0234
		76	90.2843	98.9215	98.2268	90.6649	87.0487	95.0168	93.1967	92.1298	94.2376	92.659	93.9702	82.6818	88.8943	95.5018	90.1427	87.0941	84.925	83.2398	88.7965	85.2154	93.1828	86.9382	100.019	99.9174	99.9593	99.356	99.2656	97.7036	97.0687	98.8207	98.5396	97.189	92.7173	93.4295	87.1363	99.3974	97.9399	84.0392
		76.5	90.6629	98.747	98.201	90.9752	87.0082	95.5104	93.3953	92.2139	94.1516	93.2023	94.1887	83.3714	89.1226	95.8631	90.6852	87.323	85.459	83.5738	88.7804	85.6287	93.1705	87.2776	100.023	99.8018	99.9036	99.3507	99.3321	97.7242	97.0906	98.9315	98.85	97.3153	93.3569	93.7358	87.4288	99.3784	98.1235	84.6065
		77	90.7732	98.8093	98.2271	91.1538	87.2129	95.5692	93.5509	92.3363	94.1383	93.6956	94.4054	83.3493	89.2614	96.0408	90.5526	87.5007	86.215	83.9071	89.0148	85.8227	93.7538	87.3675	100.025	99.8121	99.9233	99.4743	99.5583	97.8704	97.4139	98.9845	98.7009	97.4353	93.7308	93.8154	87.5732	99.3968	98.3356	84.9839
		77.5	90.8403	98.8931	98.3447	90.9853	87.6886	95.7981	93.7902	92.5746	94.4681	94.1165	95.0989	83.3404	89.3975	96.4923	91.0531	88.4046	86.2949	84.4404	88.9023	86.3953	94.0316	87.6222	100.005	99.9663	100.025	99.5108	99.5875	97.9364	97.5123	99.0848	98.9812	97.6864	94.3478	94.1008	87.8744	99.7417	98.375	85.5679
		78	91.312	99.1902	98.2847	91.3381	88.0603	95.7743	93.851	92.7758	94.0303	94.4373	95.3714	83.6069	89.6794	96.4056	91.299	88.7292	86.4658	84.4814	89.2493	86.0916	94.2391	87.5681	100.061	99.9795	100.076	99.4341	99.5706	98.1817	97.5068	99.316	99.1046	97.9255	94.0723	94.2484	88.2944	99.7005	98.6069	85.6943
		78.5	91.5359	99.1139	98.5566	91.7069	88.1888	95.8918	94.1835	93.0722	94.8597	94.1899	95.3593	83.664	89.7276	96.3233	91.366	88.9382	86.6724	84.886	89.6416	86.6606	94.5703	88.0588	100.015	99.8972	99.997	99.564	99.6957	98.2195	97.3779	99.4024	99.1233	98.1403	94.7058	94.4439	88.83	99.6155	98.5783	85.9569
		79	91.8913	98.9868	98.6959	92.103	88.3119	96.3682	94.3605	93.1477	94.8118	94.3417	95.5383	83.8747	90.3674	96.3727	91.5026	89.2904	87.0356	85.1195	90.1108	86.6075	94.4631	88.5595	100.01	99.8787	100.033	99.6558	99.7912	98.1745	97.513	99.3303	99.2047	98.1294	95.0547	94.6699	89.2266	99.7918	98.5829	86.364
		79.5	92.1273	99.1537	98.4565	92.2663	88.2091	96.6703	94.6188	93.6354	95.1667	94.494	95.7695	84.4558	90.6646	96.4741	91.8089	89.684	87.1462	85.1131	90.0903	88.0593	94.6562	88.727	99.9888	100.002	100.008	99.6729	99.85	98.2538	97.7437	99.3843	99.3688	98.0469	95.6409	94.7264	89.7371	99.6152	98.7764	86.8544
		80	92.6293	99.1097	98.7075	92.4895	88.9136	96.7829	94.8229	93.9284	95.6988	94.6955	95.9889	84.7496	90.6783	96.7361	92.07	89.9041	87.8345	85.0973	90.5634	87.9424	95.08	89.1059	100.035	100.048	100.043	99.6936	99.8256	98.2268	97.7814	99.6372	99.349	98.4351	96.0326	94.9225	89.8545	99.4171	98.773	86.9475
		80.5	92.9549	99.1382	98.6618	92.5663	89.0578	96.7844	94.9778	93.8039	95.8805	94.9485	96.1638	85.0054	90.7551	96.8158	92.2189	90.2006	88.1741	85.6232	90.6574	88.1872	95.4426	89.4091	100.028	99.9586	100.039	99.7317	99.8882	98.3515	97.7082	99.5571	99.3583	98.349	96.2937	95.0425	90.1626	99.5204	98.7954	87.2879
		81	92.8892	99.1754	98.5921	92.7663	89.1126	96.8507	95.1497	93.8299	95.7094	94.9401	96.1657	85.4548	91.1702	97.0634	92.6141	90.6405	88.464	85.4719	90.9168	88.4142	95.4686	89.7662	100.017	100.014	100.123	99.7481	99.831	98.3624	97.985	99.8416	99.5506	98.4962	96.7294	95.2859	90.4344	99.5387	98.6852	87.617
		81.5	93.3007	99.2503	98.4624	92.8144	89.0542	97.1944	95.167	94.387	96.0937	95.2853	96.5235	85.731	91.5495	97.4782	92.6304	90.9834	89.0167	86.002	90.9196	88.6665	95.7349	89.8115	100.01	99.994	100.159	99.7774	99.9324	98.4367	98.0639	99.7943	99.5597	98.42	97.1445	95.4843	90.5469	99.51	98.6935	88.5269
		82	93.397	99.2553	98.3273	92.819	89.4409	97.2283	95.3133	94.516	96.0126	95.6443	96.8819	85.7515	91.6343	97.5664	92.988	91.1518	88.8885	86.3044	91.2306	89.1632	95.7348	89.7846	99.9967	100.01	100.183	99.8817	99.9049	98.4882	98.1747	99.8296	99.5925	98.4849	97.0942	95.721	91.1742	99.5361	98.7728	88.6181
		82.5	93.9113	99.39	98.5109	93.0928	89.547	97.3669	95.5562	94.6815	95.7675	95.8534	97.0455	86.2072	91.835	97.7872	93.2442	90.9727	89.1154	86.5968	91.3355	89.6478	95.8344	89.9199	99.9838	99.9855	100.189	99.9214	99.9304	98.4374	98.1713	99.8483	99.7027	98.6784	97.2074	95.9113	91.2787	99.5591	98.7687	88.8359
		83	94.3633	99.5292	98.7186	93.9287	89.7643	97.5149	95.6863	94.8256	95.7743	95.9175	97.2785	86.2001	92.0198	97.9449	93.3724	90.8724	89.6933	86.2669	91.903	89.9484	95.918	89.7947	99.96	100.02	100.272	99.9338	100.049	98.4652	98.1657	99.9249	99.7856	98.7428	97.7662	96.0417	91.8055	99.5493	98.8196	89.002
		83.5	94.6662	99.5675	98.7751	93.9832	89.883	97.5787	95.8394	95.3669	95.921	95.9075	97.4903	86.3167	92.2503	97.9034	93.5614	91.3299	89.9921	86.8954	92.197	89.9905	96.16	90.3422	99.9555	99.9633	100.256	99.9422	99.9216	98.4604	98.3495	99.9124	99.7599	98.7408	97.8426	96.119	92.0075	99.6096	98.9313	89.6898
		84	94.7393	99.547	98.9446	94.1138	90.0091	97.4052	95.9828	95.2656	96.2626	96.0862	97.5219	86.828	92.5986	98.1452	93.6068	91.7006	90.2519	87.099	92.1765	90.0097	96.2497	90.2969	99.9855	100.083	100.201	99.9558	99.9629	98.4791	98.3676	99.9021	99.7904	98.8678	98.3089	96.2525	92.1473	99.6209	99.1432	89.7167
		84.5	95.0669	99.4806	98.8153	94.2021	90.1281	97.6581	96.1951	95.4707	96.6002	96.3338	97.5348	87.0726	93.2138	98.382	93.7133	92.0357	90.0122	87.6585	92.3164	90.4617	96.2363	90.2538	99.9677	100.014	100.289	99.9463	99.9619	98.5689	98.6047	99.9673	99.7667	98.7952	98.522	96.5081	92.8192	99.6046	99.0811	89.9892
		85	95.2942	99.5631	98.8866	94.1906	90.1138	97.7977	96.2473	95.4277	96.7782	96.5583	97.5979	86.7158	93.0385	98.2582	94.1021	91.6544	90.1886	87.7495	92.337	90.2855	96.5625	90.9205	99.9832	100.003	100.173	99.9684	100.001	98.6418	98.6278	99.9708	99.8366	98.8614	98.7772	96.6793	93.0633	99.8099	99.0831	90.4749
		85.5	95.4097	99.4937	99.1919	94.0952	90.2758	97.7408	96.4947	95.6191	96.924	97.0921	97.6249	86.7312	93.3844	98.1588	94.5125	92.2157	90.4425	87.7239	92.3868	90.3491	96.5273	90.9622	99.9581	100.006	100.137	99.9802	99.9542	98.7684	98.8351	99.9869	99.8076	98.7421	98.9648	96.8259	93.1284	99.8034	99.1528	90.6604
		86	95.643	99.6548	99.1174	94.3236	90.4555	97.781	96.4977	95.6628	97.1603	97.0294	97.8098	87.2307	93.4029	98.5944	94.5908	92.4174	90.7692	88.0672	92.4478	90.6351	96.7821	91.3111	100.006	100.042	100.247	99.9468	99.9685	98.764	98.8115	100.038	99.8393	98.8032	99.0714	96.8025	93.2782	99.7442	99.3401	91.0874
		86.5	95.6673	99.7435	99.4195	94.5798	90.4645	97.9259	96.754	95.6261	97.3086	97.3502	98.0713	87.8976	93.4527	98.6982	94.9534	92.3361	91.1245	88.6029	92.5739	90.9878	96.6804	91.6599	99.9675	100.001	100.221	99.9452	99.9771	98.7511	98.9331	99.9876	99.802	99.0867	99.2549	96.9758	93.6132	99.784	99.4629	90.95
		87	95.748	99.6177	99.1298	94.6069	90.6831	98.2802	96.9794	96.0547	97.2918	97.4966	98.1109	88.201	93.7074	98.7708	94.8163	92.7926	91.1352	88.5526	92.5888	90.618	96.6121	91.9607	99.9827	99.9989	100.233	99.9884	99.9827	98.7956	99.1061	100.025	99.8226	99.1861	99.338	97.0812	93.8295	99.8748	99.6017	91.6078
		87.5	95.6836	99.5877	99.2136	94.7235	91.0232	98.0732	96.9109	95.7526	97.53	97.6374	98.1591	88.3254	93.5959	98.8378	95.2507	92.8021	91.067	89.1723	92.6441	91.202	96.9896	92.2486	99.9627	99.9951	100.223	100.006	99.9081	98.8225	99.1848	100.03	99.8217	99.2629	99.3414	97.2482	94.1714	99.9184	99.5517	91.695
		88	95.7364	99.6619	99.3165	95.3454	91.336	98.2033	96.96	96.0416	97.6484	97.8086	98.2058	88.3931	93.8599	98.9816	95.237	92.6499	91.7429	89.6061	92.6589	91.5465	96.9677	92.3073	99.9692	99.9603	100.226	99.9878	99.9035	99.0371	99.2526	99.9941	99.9063	99.3702	99.3328	97.4329	94.6424	99.92	99.6612	92.0075
		88.5	95.8248	99.5781	99.4506	95.3197	91.2936	98.3537	97.0983	96.0677	97.6967	97.7615	98.1956	88.5432	93.7492	98.7981	95.2328	92.8388	91.577	89.6209	93.0943	91.3385	96.9705	92.5304	100.013	100.032	100.204	100.001	99.9084	99.0178	99.1941	100.012	99.7737	99.4213	99.6169	97.6648	94.7705	99.9164	99.6983	92.7803
		89	96.073	99.5486	99.6293	95.2164	91.6678	98.3659	97.2739	96.5968	98.1336	97.9493	98.4474	88.8486	93.8014	98.9351	95.2713	93.2005	91.6949	89.9518	93.0717	92.2771	97.299	92.797	100.08	100.017	100.172	100.008	99.9306	99.0532	99.1086	100.059	99.7626	99.5728	99.6007	97.9896	95.1895	99.818	99.7194	92.3914
		89.5	96.3935	99.6166	99.6014	95.418	91.6075	98.5264	97.7725	96.684	97.9045	97.9132	98.5467	89.2699	93.9679	98.9661	95.4937	93.2799	92.0501	90.3141	92.8709	92.168	97.4366	92.6887	100.026	100.085	100.095	100.025	99.9691	99.1758	99.235	100.01	99.7135	99.522	99.6437	98.0883	95.3375	99.7917	99.8102	93.0568
		90	96.4536	99.6173	99.5519	95.2796	91.9398	98.5914	97.8113	96.8914	97.8364	98.0287	98.6038	89.3057	94.0688	98.8331	95.5999	93.0386	92.2582	90.5425	93.0264	92.3349	97.4498	93.0872	100.008	100.011	100.227	99.9984	99.9987	99.159	99.3191	99.9968	99.8425	99.5165	99.6817	98.2267	95.452	99.8678	99.7931	93.3986
		90.5	96.6734	99.6315	99.4765	95.1561	92.2482	98.7072	98.0113	97.1597	98.1416	98.0973	98.7965	89.3529	93.8698	99.0347	95.624	93.5751	92.6487	90.562	93.2475	92.2412	97.4276	93.0377	100.006	100.039	100.284	99.9943	99.9955	99.1863	99.2019	100.022	99.8115	99.4295	99.6896	98.2293	95.5807	99.8324	99.8464	93.8517
		91	97.037	99.5298	99.3137	95.3623	92.543	98.8167	98.1396	97.1202	98.1415	98.0407	98.7949	89.7566	93.917	99.0069	95.3919	93.7261	92.9051	90.8318	93.2413	92.0877	97.6082	93.3322	99.9489	100.061	100.255	99.992	99.8935	99.1764	99.3165	99.9912	99.7836	99.4922	99.7193	98.573	95.8705	99.8202	99.8082	94.1294

## Sheet: Figure 4f SKMEL30
Block Type	96well
Chemistry	TAQMAN
Experiment File Name	\\Mac\Home\Desktop\New Folder With Items\Mansa sk mel30 c21orf91 230718.eds
Experiment Run End Time	2018-07-23 22:33:01 PM BST
Instrument Type	steponeplus
Passive Reference	ROX
Well	Sample Name	Target Name	Task	Reporter	Quencher	RQ	RQ Min	RQ Max	Cт	Cт Mean	Cт SD	ΔCт	ΔCт Mean	ΔCт SE	HK Control ΔCт Mean	HK Control ΔCт SE	ΔΔCт	Automatic Ct Threshold	Ct Threshold	Automatic Baseline	Baseline Start	Baseline End	Efficiency	Comments
A1		GAPDH	NTC	FAM	NFQ-MGB				37.1191									TRUE	0.0253128	TRUE	3	35	1
A2	Control 1	GAPDH	UNKNOWN	FAM	NFQ-MGB				19.1408	19.1639	0.0474281							TRUE	0.0253128	TRUE	3	16	1
A3	PPP2R3B OE 6 hours 1	GAPDH	UNKNOWN	FAM	NFQ-MGB				19.078	19.2864	0.161379							TRUE	0.0253128	TRUE	3	16	1
A4	PPP2R3B OE 16 hours 1	GAPDH	UNKNOWN	FAM	NFQ-MGB				19.4205	19.3905	0.0351042							TRUE	0.0253128	TRUE	3	17	1
A5	Control 2	GAPDH	UNKNOWN	FAM	NFQ-MGB				20.6326	20.6335	0.0333881							TRUE	0.0253128	TRUE	3	18	1
A6	PPP2R3B OE 6 hours 2	GAPDH	UNKNOWN	FAM	NFQ-MGB				19.2846	19.3834	0.0726091							TRUE	0.0253128	TRUE	3	17	1
A7	PPP2R3B OE 16 hours 2	GAPDH	UNKNOWN	FAM	NFQ-MGB				21.3334	21.3975	0.045047							TRUE	0.0253128	TRUE	3	19	1
A8	Control 3	GAPDH	UNKNOWN	FAM	NFQ-MGB				19.1651	19.2638	0.0837487							TRUE	0.0253128	TRUE	3	17	1
A9	PPP2R3B OE 6 hours 3	GAPDH	UNKNOWN	FAM	NFQ-MGB				19.9004	19.9732	0.0578558							TRUE	0.0253128	TRUE	3	17	1
A10	PPP2R3B OE 16 hours 3	GAPDH	UNKNOWN	FAM	NFQ-MGB				19.1709	19.27	0.157039							TRUE	0.0253128	TRUE	3	16	1
B1		GAPDH	NTC	FAM	NFQ-MGB				Undetermined									TRUE	0.0253128	TRUE	3	39	1
B2	Control 1	GAPDH	UNKNOWN	FAM	NFQ-MGB				19.1087	19.1639	0.0474281							TRUE	0.0253128	TRUE	3	17	1
B3	PPP2R3B OE 6 hours 1	GAPDH	UNKNOWN	FAM	NFQ-MGB				19.2559	19.2864	0.161379							TRUE	0.0253128	TRUE	3	17	1
B4	PPP2R3B OE 16 hours 1	GAPDH	UNKNOWN	FAM	NFQ-MGB				19.4198	19.3905	0.0351042							TRUE	0.0253128	TRUE	3	17	1
B5	Control 2	GAPDH	UNKNOWN	FAM	NFQ-MGB				20.5887	20.6335	0.0333881							TRUE	0.0253128	TRUE	3	18	1
B6	PPP2R3B OE 6 hours 2	GAPDH	UNKNOWN	FAM	NFQ-MGB				19.4122	19.3834	0.0726091							TRUE	0.0253128	TRUE	3	17	1
B7	PPP2R3B OE 16 hours 2	GAPDH	UNKNOWN	FAM	NFQ-MGB				21.411	21.3975	0.045047							TRUE	0.0253128	TRUE	3	19	1
B8	Control 3	GAPDH	UNKNOWN	FAM	NFQ-MGB				19.3436	19.2638	0.0837487							TRUE	0.0253128	TRUE	3	17	1
B9	PPP2R3B OE 6 hours 3	GAPDH	UNKNOWN	FAM	NFQ-MGB				19.9622	19.9732	0.0578558							TRUE	0.0253128	TRUE	3	18	1
B10	PPP2R3B OE 16 hours 3	GAPDH	UNKNOWN	FAM	NFQ-MGB				19.1847	19.27	0.157039							TRUE	0.0253128	TRUE	3	17	1
C1		GAPDH	NTC	FAM	NFQ-MGB				Undetermined									TRUE	0.0253128	TRUE	3	39	1
C2	Control 1	GAPDH	UNKNOWN	FAM	NFQ-MGB				19.1958	19.1639	0.0474281							TRUE	0.0253128	TRUE	3	16	1
C3	PPP2R3B OE 6 hours 1	GAPDH	UNKNOWN	FAM	NFQ-MGB				19.4569	19.2864	0.161379							TRUE	0.0253128	TRUE	3	17	1
C4	PPP2R3B OE 16 hours 1	GAPDH	UNKNOWN	FAM	NFQ-MGB				19.3701	19.3905	0.0351042							TRUE	0.0253128	TRUE	3	17	1
C5	Control 2	GAPDH	UNKNOWN	FAM	NFQ-MGB				20.6441	20.6335	0.0333881							TRUE	0.0253128	TRUE	3	18	1
C6	PPP2R3B OE 6 hours 2	GAPDH	UNKNOWN	FAM	NFQ-MGB				19.4556	19.3834	0.0726091							TRUE	0.0253128	TRUE	3	17	1
C7	PPP2R3B OE 16 hours 2	GAPDH	UNKNOWN	FAM	NFQ-MGB				21.4389	21.3975	0.045047							TRUE	0.0253128	TRUE	3	18	1
C8	Control 3	GAPDH	UNKNOWN	FAM	NFQ-MGB				19.3219	19.2638	0.0837487							TRUE	0.0253128	TRUE	3	17	1
C9	PPP2R3B OE 6 hours 3	GAPDH	UNKNOWN	FAM	NFQ-MGB				20.0387	19.9732	0.0578558							TRUE	0.0253128	TRUE	3	18	1
C10	PPP2R3B OE 16 hours 3	GAPDH	UNKNOWN	FAM	NFQ-MGB				19.221	19.27	0.157039							TRUE	0.0253128	TRUE	3	16	1
D1		GAPDH	NTC	FAM	NFQ-MGB				Undetermined									TRUE	0.0253128	TRUE	3	39	1
D2	Control 1	GAPDH	UNKNOWN	FAM	NFQ-MGB				19.2102	19.1639	0.0474281							TRUE	0.0253128	TRUE	3	17	1
D3	PPP2R3B OE 6 hours 1	GAPDH	UNKNOWN	FAM	NFQ-MGB				19.3549	19.2864	0.161379							TRUE	0.0253128	TRUE	3	17	1
D4	PPP2R3B OE 16 hours 1	GAPDH	UNKNOWN	FAM	NFQ-MGB				19.3515	19.3905	0.0351042							TRUE	0.0253128	TRUE	3	17	1
D5	Control 2	GAPDH	UNKNOWN	FAM	NFQ-MGB				20.6685	20.6335	0.0333881							TRUE	0.0253128	TRUE	3	18	1
D6	PPP2R3B OE 6 hours 2	GAPDH	UNKNOWN	FAM	NFQ-MGB				19.381	19.3834	0.0726091							TRUE	0.0253128	TRUE	3	17	1
D7	PPP2R3B OE 16 hours 2	GAPDH	UNKNOWN	FAM	NFQ-MGB				21.4068	21.3975	0.045047							TRUE	0.0253128	TRUE	3	19	1
D8	Control 3	GAPDH	UNKNOWN	FAM	NFQ-MGB				19.2244	19.2638	0.0837487							TRUE	0.0253128	TRUE	3	17	1
D9	PPP2R3B OE 6 hours 3	GAPDH	UNKNOWN	FAM	NFQ-MGB				19.9915	19.9732	0.0578558							TRUE	0.0253128	TRUE	3	18	1
D10	PPP2R3B OE 16 hours 3	GAPDH	UNKNOWN	FAM	NFQ-MGB				19.5034	19.27	0.157039							TRUE	0.0253128	TRUE	3	17	1
E1		c21orf91	NTC	FAM	NFQ-MGB				Undetermined									TRUE	0.544391	TRUE	3	39	1
E2	Control 1	c21orf91	UNKNOWN	FAM	NFQ-MGB	1	0.957403	1.04449	29.8855	29.911	0.0196351		10.7471	0.0256659			0	TRUE	0.544391	TRUE	3	23	1
E3	PPP2R3B OE 6 hours 1	c21orf91	UNKNOWN	FAM	NFQ-MGB	2.10396	1.81592	2.43769	28.9188	28.9604	0.0640186		9.674	0.0868064			-1.07311	TRUE	0.544391	TRUE	3	22	1
E4	PPP2R3B OE 16 hours 1	c21orf91	UNKNOWN	FAM	NFQ-MGB	3.2773	3.03593	3.53786	28.398	28.4251	0.0831023		9.0346	0.0451063			-1.71251	TRUE	0.544391	TRUE	3	22	1
E5	Control 2	c21orf91	UNKNOWN	FAM	NFQ-MGB	1.58694	1.44826	1.73889	30.5705	30.7143	0.102532		10.0809	0.0539155			-0.666244	TRUE	0.544391	TRUE	3	24	1
E6	PPP2R3B OE 6 hours 2	c21orf91	UNKNOWN	FAM	NFQ-MGB	3.35206	3.1394	3.57912	28.3553	28.3854	0.0264839		9.00206	0.0386442			-1.74505	TRUE	0.544391	TRUE	3	22	1
E7	PPP2R3B OE 16 hours 2	c21orf91	UNKNOWN	FAM	NFQ-MGB	5.88958	5.46076	6.35207	29.5305	29.5865	0.0769236		8.18894	0.0445715			-2.55816	TRUE	0.544391	TRUE	3	23	1
E8	Control 3	c21orf91	UNKNOWN	FAM	NFQ-MGB	1.51939	1.41366	1.63304	29.4252	29.4074	0.0148538		10.1436	0.0425279			-0.603497	TRUE	0.544391	TRUE	3	23	1
E9	PPP2R3B OE 6 hours 3	c21orf91	UNKNOWN	FAM	NFQ-MGB	4.91308	4.60453	5.24232	28.3495	28.4237	0.0500255		8.45048	0.0382421			-2.29663	TRUE	0.544391	TRUE	3	22	1
E10	PPP2R3B OE 16 hours 3	c21orf91	UNKNOWN	FAM	NFQ-MGB	4.62901	4.00354	5.3522	27.8084	27.8064	0.0681238		8.5364	0.0855892			-2.2107	TRUE	0.544391	TRUE	3	21	1
F1		c21orf91	NTC	FAM	NFQ-MGB				Undetermined									TRUE	0.544391	TRUE	3	39	1
F2	Control 1	c21orf91	UNKNOWN	FAM	NFQ-MGB	1	0.957403	1.04449	29.924	29.911	0.0196351		10.7471	0.0256659			0	TRUE	0.544391	TRUE	3	23	1
F3	PPP2R3B OE 6 hours 1	c21orf91	UNKNOWN	FAM	NFQ-MGB	2.10396	1.81592	2.43769	28.9534	28.9604	0.0640186		9.674	0.0868064			-1.07311	TRUE	0.544391	TRUE	3	22	1
F4	PPP2R3B OE 16 hours 1	c21orf91	UNKNOWN	FAM	NFQ-MGB	3.2773	3.03593	3.53786	28.5472	28.4251	0.0831023		9.0346	0.0451063			-1.71251	TRUE	0.544391	TRUE	3	22	1
F5	Control 2	c21orf91	UNKNOWN	FAM	NFQ-MGB	1.58694	1.44826	1.73889	30.7362	30.7143	0.102532		10.0809	0.0539155			-0.666244	TRUE	0.544391	TRUE	3	24	1
F6	PPP2R3B OE 6 hours 2	c21orf91	UNKNOWN	FAM	NFQ-MGB	3.35206	3.1394	3.57912	28.4107	28.3854	0.0264839		9.00206	0.0386442			-1.74505	TRUE	0.544391	TRUE	3	22	1
F7	PPP2R3B OE 16 hours 2	c21orf91	UNKNOWN	FAM	NFQ-MGB	5.88958	5.46076	6.35207	29.5101	29.5865	0.0769236		8.18894	0.0445715			-2.55816	TRUE	0.544391	TRUE	3	23	1
F8	Control 3	c21orf91	UNKNOWN	FAM	NFQ-MGB	1.51939	1.41366	1.63304	29.4066	29.4074	0.0148538		10.1436	0.0425279			-0.603497	TRUE	0.544391	TRUE	3	23	1
F9	PPP2R3B OE 6 hours 3	c21orf91	UNKNOWN	FAM	NFQ-MGB	4.91308	4.60453	5.24232	28.4535	28.4237	0.0500255		8.45048	0.0382421			-2.29663	TRUE	0.544391	TRUE	3	22	1
F10	PPP2R3B OE 16 hours 3	c21orf91	UNKNOWN	FAM	NFQ-MGB	4.62901	4.00354	5.3522	27.9017	27.8064	0.0681238		8.5364	0.0855892			-2.2107	TRUE	0.544391	TRUE	3	21	1
G1		c21orf91	NTC	FAM	NFQ-MGB				Undetermined									TRUE	0.544391	TRUE	3	39	1
G2	Control 1	c21orf91	UNKNOWN	FAM	NFQ-MGB	1	0.957403	1.04449	29.9058	29.911	0.0196351		10.7471	0.0256659			0	TRUE	0.544391	TRUE	3	23	1
G3	PPP2R3B OE 6 hours 1	c21orf91	UNKNOWN	FAM	NFQ-MGB	2.10396	1.81592	2.43769	28.9165	28.9604	0.0640186		9.674	0.0868064			-1.07311	TRUE	0.544391	TRUE	3	22	1
G4	PPP2R3B OE 16 hours 1	c21orf91	UNKNOWN	FAM	NFQ-MGB	3.2773	3.03593	3.53786	28.3612	28.4251	0.0831023		9.0346	0.0451063			-1.71251	TRUE	0.544391	TRUE	3	22	1
G5	Control 2	c21orf91	UNKNOWN	FAM	NFQ-MGB	1.58694	1.44826	1.73889	30.8137	30.7143	0.102532		10.0809	0.0539155			-0.666244	TRUE	0.544391	TRUE	3	24	1
G6	PPP2R3B OE 6 hours 2	c21orf91	UNKNOWN	FAM	NFQ-MGB	3.35206	3.1394	3.57912	28.4045	28.3854	0.0264839		9.00206	0.0386442			-1.74505	TRUE	0.544391	TRUE	3	22	1
G7	PPP2R3B OE 16 hours 2	c21orf91	UNKNOWN	FAM	NFQ-MGB	5.88958	5.46076	6.35207	29.6489	29.5865	0.0769236		8.18894	0.0445715			-2.55816	TRUE	0.544391	TRUE	3	23	1
G8	Control 3	c21orf91	UNKNOWN	FAM	NFQ-MGB	1.51939	1.41366	1.63304	29.3889	29.4074	0.0148538		10.1436	0.0425279			-0.603497	TRUE	0.544391	TRUE	3	23	1
G9	PPP2R3B OE 6 hours 3	c21orf91	UNKNOWN	FAM	NFQ-MGB	4.91308	4.60453	5.24232	28.4381	28.4237	0.0500255		8.45048	0.0382421			-2.29663	TRUE	0.544391	TRUE	3	21	1
G10	PPP2R3B OE 16 hours 3	c21orf91	UNKNOWN	FAM	NFQ-MGB	4.62901	4.00354	5.3522	27.7653	27.8064	0.0681238		8.5364	0.0855892			-2.2107	TRUE	0.544391	TRUE	3	21	1
H1		c21orf91	NTC	FAM	NFQ-MGB				Undetermined									TRUE	0.544391	TRUE	3	39	1
H2	Control 1	c21orf91	UNKNOWN	FAM	NFQ-MGB	1	0.957403	1.04449	29.9287	29.911	0.0196351		10.7471	0.0256659			0	TRUE	0.544391	TRUE	3	23	1
H3	PPP2R3B OE 6 hours 1	c21orf91	UNKNOWN	FAM	NFQ-MGB	2.10396	1.81592	2.43769	29.053	28.9604	0.0640186		9.674	0.0868064			-1.07311	TRUE	0.544391	TRUE	3	23	1
H4	PPP2R3B OE 16 hours 1	c21orf91	UNKNOWN	FAM	NFQ-MGB	3.2773	3.03593	3.53786	28.3939	28.4251	0.0831023		9.0346	0.0451063			-1.71251	TRUE	0.544391	TRUE	3	22	1
H5	Control 2	c21orf91	UNKNOWN	FAM	NFQ-MGB	1.58694	1.44826	1.73889	30.7369	30.7143	0.102532		10.0809	0.0539155			-0.666244	TRUE	0.544391	TRUE	3	24	1
H6	PPP2R3B OE 6 hours 2	c21orf91	UNKNOWN	FAM	NFQ-MGB	3.35206	3.1394	3.57912	28.3713	28.3854	0.0264839		9.00206	0.0386442			-1.74505	TRUE	0.544391	TRUE	3	22	1
H7	PPP2R3B OE 16 hours 2	c21orf91	UNKNOWN	FAM	NFQ-MGB	5.88958	5.46076	6.35207	29.6564	29.5865	0.0769236		8.18894	0.0445715			-2.55816	TRUE	0.544391	TRUE	3	23	1
H8	Control 3	c21orf91	UNKNOWN	FAM	NFQ-MGB	1.51939	1.41366	1.63304	29.4089	29.4074	0.0148538		10.1436	0.0425279			-0.603497	TRUE	0.544391	TRUE	3	23	1
H9	PPP2R3B OE 6 hours 3	c21orf91	UNKNOWN	FAM	NFQ-MGB	4.91308	4.60453	5.24232	28.4537	28.4237	0.0500255		8.45048	0.0382421			-2.29663	TRUE	0.544391	TRUE	3	22	1
H10	PPP2R3B OE 16 hours 3	c21orf91	UNKNOWN	FAM	NFQ-MGB	4.62901	4.00354	5.3522	27.7502	27.8064	0.0681238		8.5364	0.0855892			-2.2107	TRUE	0.544391	TRUE	3	21	1
Analysis Type	Singleplex
Endogenous Control	GAPDH
RQ Min/Max Confidence Level	95.0
Reference Sample	Control 1

## Sheet: Figure 4f SKMEL2
Block Type	96well
Chemistry	TAQMAN
Experiment File Name	\\Mac\Home\Desktop\New Folder With Items\PPP2R3B\QPCR DATA\c21orf91 qPCR 230718\Mansa sk mel2 c21orf91 230718.eds
Experiment Run End Time	2018-07-23 21:29:30 PM BST
Instrument Type	steponeplus
Passive Reference	ROX
Well	Sample Name	Target Name	Task	Reporter	Quencher	RQ	RQ Min	RQ Max	Cт	Cт Mean	Cт SD	ΔCт	ΔCт Mean	ΔCт SE	HK Control ΔCт Mean	HK Control ΔCт SE	ΔΔCт	Automatic Ct Threshold	Ct Threshold	Automatic Baseline	Baseline Start	Baseline End	Efficiency	Comments	OUTLIERRG
A1		c21orf91	NTC	FAM	NFQ-MGB				Undetermined									TRUE	0.573171	TRUE	3	39	1		N
A2	Control 1	c21orf91	UNKNOWN	FAM	NFQ-MGB	1	0.835994	1.19618	28.9119	28.7	0.196785		5.93118	0.105617			0	TRUE	0.573171	TRUE	3	22	1		N
A3	PPP2R3B OE 6 hours 1	c21orf91	UNKNOWN	FAM	NFQ-MGB	2.50032	2.25264	2.77523	28.4283	28.3894	0.0392917		4.60906	0.0615034			-1.32211	TRUE	0.573171	TRUE	3	22	1		N
A4	PPP2R3B OE 16 hours 1	c21orf91	UNKNOWN	FAM	NFQ-MGB	2.90573	2.41445	3.49698	28.1673	28.1174	0.137891		4.39227	0.109201			-1.5389	TRUE	0.573171	TRUE	3	21	1		N
A5	Control 2	c21orf91	UNKNOWN	FAM	NFQ-MGB	0.793236	0.726799	0.865745	29.3212	29.3464	0.0675729		6.26535	0.0515722			0.334178	TRUE	0.573171	TRUE	3	23	1		N
A6	PPP2R3B OE 6 hours 2	c21orf91	UNKNOWN	FAM	NFQ-MGB	2.43026	2.21743	2.66352	28.7581	28.8353	0.0931216		4.65006	0.0540363			-1.28111	TRUE	0.573171	TRUE	3	22	1		N
A7	PPP2R3B OE 16 hours 2	c21orf91	UNKNOWN	FAM	NFQ-MGB	2.41643	2.24877	2.59659	27.9169	27.8967	0.0533669		4.6583	0.0423963			-1.27288	TRUE	0.573171	TRUE	3	21	1		N
A8	Control 3	c21orf91	UNKNOWN	FAM	NFQ-MGB	1.01615	0.889911	1.16029	31.0393	31.0028	0.0811969		5.90807	0.0782111			-0.023109	TRUE	0.573171	TRUE	3	24	1		N
A9	PPP2R3B OE 6 hours 3	c21orf91	UNKNOWN	FAM	NFQ-MGB	2.61721	2.51228	2.72653	28.5747	28.5274	0.0390902		4.54314	0.0241257			-1.38803	TRUE	0.573171	TRUE	3	22	1		N
A10	PPP2R3B OE 16 hours 3	c21orf91	UNKNOWN	FAM	NFQ-MGB	3.39985	3.06747	3.76824	28.8856	28.8494	0.0805328		4.1657	0.0606566			-1.76547	TRUE	0.573171	TRUE	3	22	1		N
A11	Sample 5	c21orf91	UNKNOWN	FAM	NFQ-MGB	2.39719	2.10484	2.73015	28.2969	28.3998	0.126073		4.66983	0.0766818			-1.26135	TRUE	0.573171	TRUE	3	22	1		N
B1		c21orf91	NTC	FAM	NFQ-MGB				Undetermined									TRUE	0.573171	TRUE	3	39	1		N
B2	Control 1	c21orf91	UNKNOWN	FAM	NFQ-MGB	1	0.835994	1.19618	28.7837	28.7	0.196785		5.93118	0.105617			0	TRUE	0.573171	TRUE	3	22	1		N
B3	PPP2R3B OE 6 hours 1	c21orf91	UNKNOWN	FAM	NFQ-MGB	2.50032	2.25264	2.77523	28.4152	28.3894	0.0392917		4.60906	0.0615034			-1.32211	TRUE	0.573171	TRUE	3	22	1		N
B4	PPP2R3B OE 16 hours 1	c21orf91	UNKNOWN	FAM	NFQ-MGB	2.90573	2.41445	3.49698	28.2356	28.1174	0.137891		4.39227	0.109201			-1.5389	TRUE	0.573171	TRUE	3	21	1		N
B5	Control 2	c21orf91	UNKNOWN	FAM	NFQ-MGB	0.793236	0.726799	0.865745	29.2954	29.3464	0.0675729		6.26535	0.0515722			0.334178	TRUE	0.573171	TRUE	3	23	1		N
B6	PPP2R3B OE 6 hours 2	c21orf91	UNKNOWN	FAM	NFQ-MGB	2.43026	2.21743	2.66352	28.9707	28.8353	0.0931216		4.65006	0.0540363			-1.28111	TRUE	0.573171	TRUE	3	22	1		N
B7	PPP2R3B OE 16 hours 2	c21orf91	UNKNOWN	FAM	NFQ-MGB	2.41643	2.24877	2.59659	27.9495	27.8967	0.0533669		4.6583	0.0423963			-1.27288	TRUE	0.573171	TRUE	3	20	1		N
B8	Control 3	c21orf91	UNKNOWN	FAM	NFQ-MGB	1.01615	0.889911	1.16029	31.0729	31.0028	0.0811969		5.90807	0.0782111			-0.023109	TRUE	0.573171	TRUE	3	25	1		N
B9	PPP2R3B OE 6 hours 3	c21orf91	UNKNOWN	FAM	NFQ-MGB	2.61721	2.51228	2.72653	28.4823	28.5274	0.0390902		4.54314	0.0241257			-1.38803	TRUE	0.573171	TRUE	3	22	1		N
B10	PPP2R3B OE 16 hours 3	c21orf91	UNKNOWN	FAM	NFQ-MGB	3.39985	3.06747	3.76824	28.7806	28.8494	0.0805328		4.1657	0.0606566			-1.76547	TRUE	0.573171	TRUE	3	22	1		N
B11	Sample 5	c21orf91	UNKNOWN	FAM	NFQ-MGB	2.39719	2.10484	2.73015	28.2854	28.3998	0.126073		4.66983	0.0766818			-1.26135	TRUE	0.573171	TRUE	3	22	1		N
C1		c21orf91	NTC	FAM	NFQ-MGB				Undetermined									TRUE	0.573171	TRUE	3	39	1		N
C2	Control 1	c21orf91	UNKNOWN	FAM	NFQ-MGB	1	0.835994	1.19618	28.6532	28.7	0.196785		5.93118	0.105617			0	TRUE	0.573171	TRUE	3	22	1		N
C3	PPP2R3B OE 6 hours 1	c21orf91	UNKNOWN	FAM	NFQ-MGB	2.50032	2.25264	2.77523	28.3705	28.3894	0.0392917		4.60906	0.0615034			-1.32211	TRUE	0.573171	TRUE	3	21	1		N
C4	PPP2R3B OE 16 hours 1	c21orf91	UNKNOWN	FAM	NFQ-MGB	2.90573	2.41445	3.49698	28.1483	28.1174	0.137891		4.39227	0.109201			-1.5389	TRUE	0.573171	TRUE	3	21	1		N
C5	Control 2	c21orf91	UNKNOWN	FAM	NFQ-MGB	0.793236	0.726799	0.865745	29.3231	29.3464	0.0675729		6.26535	0.0515722			0.334178	TRUE	0.573171	TRUE	3	22	1		N
C6	PPP2R3B OE 6 hours 2	c21orf91	UNKNOWN	FAM	NFQ-MGB	2.43026	2.21743	2.66352	28.8111	28.8353	0.0931216		4.65006	0.0540363			-1.28111	TRUE	0.573171	TRUE	3	22	1		N
C7	PPP2R3B OE 16 hours 2	c21orf91	UNKNOWN	FAM	NFQ-MGB	2.41643	2.24877	2.59659	27.8969	27.8967	0.0533669		4.6583	0.0423963			-1.27288	TRUE	0.573171	TRUE	3	21	1		N
C8	Control 3	c21orf91	UNKNOWN	FAM	NFQ-MGB	1.01615	0.889911	1.16029	30.8869	31.0028	0.0811969		5.90807	0.0782111			-0.023109	TRUE	0.573171	TRUE	3	24	1		N
C9	PPP2R3B OE 6 hours 3	c21orf91	UNKNOWN	FAM	NFQ-MGB	2.61721	2.51228	2.72653	28.5386	28.5274	0.0390902		4.54314	0.0241257			-1.38803	TRUE	0.573171	TRUE	3	22	1		N
C10	PPP2R3B OE 16 hours 3	c21orf91	UNKNOWN	FAM	NFQ-MGB	3.39985	3.06747	3.76824	28.7853	28.8494	0.0805328		4.1657	0.0606566			-1.76547	TRUE	0.573171	TRUE	3	22	1		N
C11	Sample 5	c21orf91	UNKNOWN	FAM	NFQ-MGB	2.39719	2.10484	2.73015	28.4953	28.3998	0.126073		4.66983	0.0766818			-1.26135	TRUE	0.573171	TRUE	3	21	1		N
D1		c21orf91	NTC	FAM	NFQ-MGB				Undetermined									TRUE	0.573171	TRUE	3	39	1		N
D2	Control 1	c21orf91	UNKNOWN	FAM	NFQ-MGB	1	0.835994	1.19618	28.4509	28.7	0.196785		5.93118	0.105617			0	TRUE	0.573171	TRUE	3	22	1		N
D3	PPP2R3B OE 6 hours 1	c21orf91	UNKNOWN	FAM	NFQ-MGB	2.50032	2.25264	2.77523	28.3436	28.3894	0.0392917		4.60906	0.0615034			-1.32211	TRUE	0.573171	TRUE	3	21	1		N
D4	PPP2R3B OE 16 hours 1	c21orf91	UNKNOWN	FAM	NFQ-MGB	2.90573	2.41445	3.49698	27.9184	28.1174	0.137891		4.39227	0.109201			-1.5389	TRUE	0.573171	TRUE	3	20	1		N
D5	Control 2	c21orf91	UNKNOWN	FAM	NFQ-MGB	0.793236	0.726799	0.865745	29.446	29.3464	0.0675729		6.26535	0.0515722			0.334178	TRUE	0.573171	TRUE	3	23	1		N
D6	PPP2R3B OE 6 hours 2	c21orf91	UNKNOWN	FAM	NFQ-MGB	2.43026	2.21743	2.66352	28.8015	28.8353	0.0931216		4.65006	0.0540363			-1.28111	TRUE	0.573171	TRUE	3	22	1		N
D7	PPP2R3B OE 16 hours 2	c21orf91	UNKNOWN	FAM	NFQ-MGB	2.41643	2.24877	2.59659	27.8235	27.8967	0.0533669		4.6583	0.0423963			-1.27288	TRUE	0.573171	TRUE	3	21	1		N
D8	Control 3	c21orf91	UNKNOWN	FAM	NFQ-MGB	1.01615	0.889911	1.16029	31.0123	31.0028	0.0811969		5.90807	0.0782111			-0.023109	TRUE	0.573171	TRUE	3	24	1		N
D9	PPP2R3B OE 6 hours 3	c21orf91	UNKNOWN	FAM	NFQ-MGB	2.61721	2.51228	2.72653	28.514	28.5274	0.0390902		4.54314	0.0241257			-1.38803	TRUE	0.573171	TRUE	3	22	1		N
D10	PPP2R3B OE 16 hours 3	c21orf91	UNKNOWN	FAM	NFQ-MGB	3.39985	3.06747	3.76824	28.9459	28.8494	0.0805328		4.1657	0.0606566			-1.76547	TRUE	0.573171	TRUE	3	22	1		N
D11	Sample 5	c21orf91	UNKNOWN	FAM	NFQ-MGB	2.39719	2.10484	2.73015	28.5218	28.3998	0.126073		4.66983	0.0766818			-1.26135	TRUE	0.573171	TRUE	3	22	1		N
E1		GAPDH	NTC	FAM	NFQ-MGB				Undetermined									TRUE	0.389387	TRUE	3	39	1		N
E2	Control 1	GAPDH	UNKNOWN	FAM	NFQ-MGB				22.8523	22.7688	0.0767844							TRUE	0.389387	TRUE	3	16	1		N
E3	PPP2R3B OE 6 hours 1	GAPDH	UNKNOWN	FAM	NFQ-MGB				23.9373	23.7803	0.116563							TRUE	0.389387	TRUE	3	17	1		N
E4	PPP2R3B OE 16 hours 1	GAPDH	UNKNOWN	FAM	NFQ-MGB				23.6347	23.7251	0.169369							TRUE	0.389387	TRUE	3	17	1		N
E5	Control 2	GAPDH	UNKNOWN	FAM	NFQ-MGB				23.0482	23.0811	0.0779274							TRUE	0.389387	TRUE	3	16	1		N
E6	PPP2R3B OE 6 hours 2	GAPDH	UNKNOWN	FAM	NFQ-MGB				24.2014	24.1853	0.0548456							TRUE	0.389387	TRUE	3	18	1		N
E7	PPP2R3B OE 16 hours 2	GAPDH	UNKNOWN	FAM	NFQ-MGB				23.2287	23.2384	0.065892							TRUE	0.389387	TRUE	3	16	1		N
E8	Control 3	GAPDH	UNKNOWN	FAM	NFQ-MGB				24.9747	25.0948	0.133697							TRUE	0.389387	TRUE	3	18	1		N
E9	PPP2R3B OE 6 hours 3	GAPDH	UNKNOWN	FAM	NFQ-MGB				23.9929	23.9843	0.0282869							TRUE	0.389387	TRUE	3	17	1		N
E10	PPP2R3B OE 16 hours 3	GAPDH	UNKNOWN	FAM	NFQ-MGB				24.632	24.6837	0.0907268							TRUE	0.389387	TRUE	3	18	1		N
E11	Sample 5	GAPDH	UNKNOWN	FAM	NFQ-MGB				23.6191	23.73	0.0873268							TRUE	0.389387	TRUE	3	17	1		N
F1		GAPDH	NTC	FAM	NFQ-MGB				Undetermined									TRUE	0.389387	TRUE	3	39	1		N
F2	Control 1	GAPDH	UNKNOWN	FAM	NFQ-MGB				22.7814	22.7688	0.0767844							TRUE	0.389387	TRUE	3	16	1		N
F3	PPP2R3B OE 6 hours 1	GAPDH	UNKNOWN	FAM	NFQ-MGB				23.7043	23.7803	0.116563							TRUE	0.389387	TRUE	3	17	1		N
F4	PPP2R3B OE 16 hours 1	GAPDH	UNKNOWN	FAM	NFQ-MGB				23.9778	23.7251	0.169369							TRUE	0.389387	TRUE	3	17	1		Y
F5	Control 2	GAPDH	UNKNOWN	FAM	NFQ-MGB				22.9885	23.0811	0.0779274							TRUE	0.389387	TRUE	3	16	1		N
F6	PPP2R3B OE 6 hours 2	GAPDH	UNKNOWN	FAM	NFQ-MGB				24.1092	24.1853	0.0548456							TRUE	0.389387	TRUE	3	17	1		N
F7	PPP2R3B OE 16 hours 2	GAPDH	UNKNOWN	FAM	NFQ-MGB				23.1778	23.2384	0.065892							TRUE	0.389387	TRUE	3	16	1		N
F8	Control 3	GAPDH	UNKNOWN	FAM	NFQ-MGB				25.081	25.0948	0.133697							TRUE	0.389387	TRUE	3	18	1		N
F9	PPP2R3B OE 6 hours 3	GAPDH	UNKNOWN	FAM	NFQ-MGB				24.0163	23.9843	0.0282869							TRUE	0.389387	TRUE	3	17	1		N
F10	PPP2R3B OE 16 hours 3	GAPDH	UNKNOWN	FAM	NFQ-MGB				24.7899	24.6837	0.0907268							TRUE	0.389387	TRUE	3	18	1		N
F11	Sample 5	GAPDH	UNKNOWN	FAM	NFQ-MGB				23.7345	23.73	0.0873268							TRUE	0.389387	TRUE	3	17	1		N
G1		GAPDH	NTC	FAM	NFQ-MGB				Undetermined									TRUE	0.389387	TRUE	3	39	1		N
G2	Control 1	GAPDH	UNKNOWN	FAM	NFQ-MGB				22.6662	22.7688	0.0767844							TRUE	0.389387	TRUE	3	16	1		N
G3	PPP2R3B OE 6 hours 1	GAPDH	UNKNOWN	FAM	NFQ-MGB				23.6804	23.7803	0.116563							TRUE	0.389387	TRUE	3	17	1		N
G4	PPP2R3B OE 16 hours 1	GAPDH	UNKNOWN	FAM	NFQ-MGB				23.6654	23.7251	0.169369							TRUE	0.389387	TRUE	3	17	1		N
G5	Control 2	GAPDH	UNKNOWN	FAM	NFQ-MGB				23.1251	23.0811	0.0779274							TRUE	0.389387	TRUE	3	16	1		N
G6	PPP2R3B OE 6 hours 2	GAPDH	UNKNOWN	FAM	NFQ-MGB				24.191	24.1853	0.0548456							TRUE	0.389387	TRUE	3	17	1		N
G7	PPP2R3B OE 16 hours 2	GAPDH	UNKNOWN	FAM	NFQ-MGB				23.2153	23.2384	0.065892							TRUE	0.389387	TRUE	3	16	1		N
G8	Control 3	GAPDH	UNKNOWN	FAM	NFQ-MGB				25.0391	25.0948	0.133697							TRUE	0.389387	TRUE	3	18	1		N
G9	PPP2R3B OE 6 hours 3	GAPDH	UNKNOWN	FAM	NFQ-MGB				23.9486	23.9843	0.0282869							TRUE	0.389387	TRUE	3	17	1		N
G10	PPP2R3B OE 16 hours 3	GAPDH	UNKNOWN	FAM	NFQ-MGB				24.7244	24.6837	0.0907268							TRUE	0.389387	TRUE	3	18	1		N
G11	Sample 5	GAPDH	UNKNOWN	FAM	NFQ-MGB				23.7339	23.73	0.0873268							TRUE	0.389387	TRUE	3	17	1		N
H1		GAPDH	NTC	FAM	NFQ-MGB				Undetermined									TRUE	0.389387	TRUE	3	39	1		N
H2	Control 1	GAPDH	UNKNOWN	FAM	NFQ-MGB				22.7752	22.7688	0.0767844							TRUE	0.389387	TRUE	3	16	1		N
H3	PPP2R3B OE 6 hours 1	GAPDH	UNKNOWN	FAM	NFQ-MGB				23.7993	23.7803	0.116563							TRUE	0.389387	TRUE	3	17	1		N
H4	PPP2R3B OE 16 hours 1	GAPDH	UNKNOWN	FAM	NFQ-MGB				23.6227	23.7251	0.169369							TRUE	0.389387	TRUE	3	17	1		N
H5	Control 2	GAPDH	UNKNOWN	FAM	NFQ-MGB				23.1625	23.0811	0.0779274							TRUE	0.389387	TRUE	3	16	1		N
H6	PPP2R3B OE 6 hours 2	GAPDH	UNKNOWN	FAM	NFQ-MGB				24.2395	24.1853	0.0548456							TRUE	0.389387	TRUE	3	18	1		N
H7	PPP2R3B OE 16 hours 2	GAPDH	UNKNOWN	FAM	NFQ-MGB				23.3318	23.2384	0.065892							TRUE	0.389387	TRUE	3	17	1		N
H8	Control 3	GAPDH	UNKNOWN	FAM	NFQ-MGB				25.2843	25.0948	0.133697							TRUE	0.389387	TRUE	3	19	1		N
H9	PPP2R3B OE 6 hours 3	GAPDH	UNKNOWN	FAM	NFQ-MGB				23.9793	23.9843	0.0282869							TRUE	0.389387	TRUE	3	17	1		N
H10	PPP2R3B OE 16 hours 3	GAPDH	UNKNOWN	FAM	NFQ-MGB				24.5884	24.6837	0.0907268							TRUE	0.389387	TRUE	3	18	1		N
H11	Sample 5	GAPDH	UNKNOWN	FAM	NFQ-MGB				23.8327	23.73	0.0873268							TRUE	0.389387	TRUE	3	17	1		N
Analysis Type	Singleplex
Endogenous Control	GAPDH
RQ Min/Max Confidence Level	95.0
Reference Sample	Control 1

## Sheet: Figure 4g
Figure 5c
		SKMEL30-PTRIPZ-PPP2R3B

[truncated: 5 more sheets: Figure 5a-d, Figure S3a, Figure S3b, Figure S3d, Figure S3f]
