# Supplementary material for: Inherited duplications of PPP2R3B predispose to nevi and melanoma via a C21orf91-driven proliferative phenotype
Source: Genet Med. 2021 Jun 18;23(9):1636–47. doi: 10.1038/s41436-021-01204-y (PMC8460442; doi:10.1038/s41436-021-01204-y)
Supplement: Supplementary file 4 — Supplementary table 4 [file 41436_2021_1204_MOESM4_ESM.xlsx]

## Sheet: SKMEL2 RawLog2
	Antibody Name	14-3-3-beta	14-3-3-zeta	4E-BP1	4E-BP1_pS65	53BP1	A-Raf	ACC1	ACC_pS79	ADAR1	Akt	Akt_pS473	Akt_pT308	AMPK-a2_pS345	AMPKa	AMPKa_pT172	Annexin-I	Annexin-VII	AR	ARID1A	Atg3	Atg7	ATM	ATM_pS1981	ATR_pS428	Aurora-B	Axl	b-Actin	b-Catenin	b-Catenin_pT41_S45	B-Raf	B-Raf_pS445	B7-H4	Bad_pS112	Bak	BAP1	Bax	Bcl-xL	Bcl2	Beclin	Bid	Bim	BiP-GRP78	BRD4	c-Abl	c-IAP2	c-Jun_pS73	c-Kit	c-Myc
	Antibody Origin	R	R	R	R	R	R	R	R	M	R	R	R	R	R	R	M	M	R	R	R	R	R	R	R	R	R	R	R	R	R	R	R	R	R	M	R	R	M	G	R	R	M	R	R	R	R	R	R
	Gene Name	YWHAB	YWHAZ	EIF4EBP1	EIF4EBP1	TP53BP1	ARAF	ACACA	ACACA	ADAR	AKT1	AKT1	AKT1	PRKAA2	PRKAA1	PRKAA1	ANXA1	ANXA7	AR	ARID1A	ATG3	ATG7	ATM	ATM	ATR	AIM1	AXL	ACTB	CTNNB1	CTNNB1	BRAF	BRAF	VTCN1	BAD	BAK1	BAP1	BAX	BCL2L1	BCL2	BECN1	BID	BCL2L11	HSPA5	BRD4	ABL1	BIRC3	JUN	KIT	MYC
	Validation Status	V	V	V	V	V	V	C	V	V	V	V	V	V	C	C	V	V	V	C	V	V	V	V	C	V	V	C	V	V	C	V	C	V	C	V	V	V	V	C	C	V	C	V	V	C	V	V	C
	Slide Id	GBL1106377	GBL1106378	GBL1106144	GBL1106145	GBL1106236	GBL1106289	GBL1106462	GBL1106146	GBL1106403	GBL1106257	GBL1106170	GBL1106276	GBL1106309	GBL1106148	GBL1106149	GBL1106406	GBL1106402	GBL1106217	GBL1106322	GBL1106329	GBL1106330	GBL1106311	GBL1106312	GBL1106353	GBL1106319	GBL1106301	GBL1106282	GBL1106153	GBL1106283	GBL1106366	GBL1106157	GBL1106348	GBL1106150	GBL1106453	GBL1106429	GBL1106152	GBL1106154	GBL1106484	GBL1106451	GBL1106155	GBL1106156	GBL1106477	GBL1106325	GBL1106324	GBL1106331	GBL1106163	GBL1106454	GBL1106380
	Antibody Name in Heatmap	14-3-3-beta-R-V	14-3-3-zeta-R-V	4E-BP1-R-V	4E-BP1_pS65-R-V	53BP1-R-V	A-Raf-R-V	ACC1-R-C	ACC_pS79-R-V	ADAR1-M-V	Akt-R-V	Akt_pS473-R-V	Akt_pT308-R-V	AMPK-a2_pS345-R-V	AMPKa-R-C	AMPKa_pT172-R-C	Annexin-I-M-V	Annexin-VII-M-V	AR-R-V	ARID1A-R-C	Atg3-R-V	Atg7-R-V	ATM-R-V	ATM_pS1981-R-V	ATR_pS428-R-C	Aurora-B-R-V	Axl-R-V	b-Actin-R-C	b-Catenin-R-V	b-Catenin_pT41_S45-R-V	B-Raf-R-C	B-Raf_pS445-R-V	B7-H4-R-C	Bad_pS112-R-V	Bak-R-C	BAP1-M-V	Bax-R-V	Bcl-xL-R-V	Bcl2-M-V	Beclin-G-C	Bid-R-C	Bim-R-V	BiP-GRP78-M-C	BRD4-R-V	c-Abl-R-V	c-IAP2-R-C	c-Jun_pS73-R-V	c-Kit-R-V	c-Myc-R-C
	Probabilities (QC Score)	0.96012	0.970998	0.970697	0.965747	0.962192	0.968739	0.936665	0.962107	0.9619	0.968376	0.950891	0.965286	0.92298	0.96823	0.966847	0.89762	0.931514	0.941264	0.965541	0.929535	0.956583	0.971676	0.921248	0.956265	0.953827	0.966569	0.904157	0.9633	0.956814	0.963691	0.965826	0.89481	0.967993	0.914888	0.928461	0.951794	0.937543	0.889365	0.928658	0.940865	0.940423	0.82534	0.961683	0.9129	0.911602	0.947257	0.915797	0.957234
	Slide no.	1	2	3	4	5	6	7	8	9	10	11	12	13	14	15	16	17	18	19	20	21	22	23	24	25	26	27	28	29	30	31	32	33	34	35	36	37	38	39	40	41	42	43	44	45	46	47	48
Sample description	Sample Type	14-3-3-beta-R-V	14-3-3-zeta-R-V	4E-BP1-R-V	4E-BP1_pS65-R-V	53BP1-R-V	A-Raf-R-V	ACC1-R-C	ACC_pS79-R-V	ADAR1-M-V	Akt-R-V	Akt_pS473-R-V	Akt_pT308-R-V	AMPK-a2_pS345-R-V	AMPKa-R-C	AMPKa_pT172-R-C	Annexin-I-M-V	Annexin-VII-M-V	AR-R-V	ARID1A-R-C	Atg3-R-V	Atg7-R-V	ATM-R-V	ATM_pS1981-R-V	ATR_pS428-R-C	Aurora-B-R-V	Axl-R-V	b-Actin-R-C	b-Catenin-R-V	b-Catenin_pT41_S45-R-V	B-Raf-R-C	B-Raf_pS445-R-V	B7-H4-R-C	Bad_pS112-R-V	Bak-R-C	BAP1-M-V	Bax-R-V	Bcl-xL-R-V	Bcl2-M-V	Beclin-G-C	Bid-R-C	Bim-R-V	BiP-GRP78-M-C	BRD4-R-V	c-Abl-R-V	c-IAP2-R-C	c-Jun_pS73-R-V	c-Kit-R-V	c-Myc-R-C
		RawLog2	RawLog2	RawLog2	RawLog2	RawLog2	RawLog2	RawLog2	RawLog2	RawLog2	RawLog2	RawLog2	RawLog2	RawLog2	RawLog2	RawLog2	RawLog2	RawLog2	RawLog2	RawLog2	RawLog2	RawLog2	RawLog2	RawLog2	RawLog2	RawLog2	RawLog2	RawLog2	RawLog2	RawLog2	RawLog2	RawLog2	RawLog2	RawLog2	RawLog2	RawLog2	RawLog2	RawLog2	RawLog2	RawLog2	RawLog2	RawLog2	RawLog2	RawLog2	RawLog2	RawLog2	RawLog2	RawLog2	RawLog2
SKMEL2 UNINDUCED	Human cell lines	-0.256052	0.90635	1.44328	1.9412	1.48134	0.187767	2.33571	0.604985	1.22401	2.92943	-1.02869	-0.291695	-0.736637	1.29107	1.05484	-0.0538823	0.276443	-0.358314	2.545	-0.688552	0.579936	2.79185	-1.19783	-0.647265	-0.58193	-0.25149	-1.18349	-0.406458	-0.10615	0.55504	0.681269	-2.63093	0.273115	-0.747831	0.526489	0.589457	-0.0770256	-0.882935	-0.618908	-1.02352	-0.241483	-1.50066	2.42263	-0.597422	-2.12686	-1.32716	-0.066717	0.510892
SKMEL2 PPP2R3B OE 6h	Human cell lines	-0.145814	0.987505	1.55451	2.01029	1.54817	0.253372	2.31805	0.778611	1.28325	3.01281	-0.742179	-0.136296	-0.670627	1.38088	1.30243	-0.0128095	0.309005	-0.275455	2.719	-0.639768	0.609541	2.98886	-1.11311	-0.54871	-0.491418	-0.178873	-1.16471	-0.271567	-0.0180238	0.609073	0.7776	-2.59142	0.352259	-0.698607	0.462192	0.736984	0.264977	-0.860917	-0.537782	-0.866008	-0.170586	-1.39195	2.52086	-0.503358	-2.01169	-1.23106	-0.0189011	0.535033
SKMEL2 PPP2R3B OE 16h	Human cell lines	-0.288507	0.840734	1.3682	1.80226	1.47123	0.134085	2.15619	0.497175	1.16781	2.90352	-0.957564	-0.33045	-0.822655	1.21753	1.11588	-0.19243	0.195625	-0.382872	2.45429	-0.801926	0.561054	2.91901	-1.23092	-0.722843	-0.620579	-0.404017	-1.21741	-0.44276	-0.13521	0.488815	0.606682	-2.6826	0.192893	-0.8835	0.439829	0.577486	-0.154952	-1.05766	-0.658213	-1.1275	-0.250424	-1.53264	2.39114	-0.601379	-2.11728	-1.37701	-0.149083	0.43221
SKMEL2 UNINDUCED	Human cell lines	-0.0607205	1.05162	1.62323	2.13966	1.67614	0.318768	2.55364	0.797426	1.34439	3.12548	-1.24375	-0.306844	-0.607183	1.45697	1.2205	0.0146745	0.418676	-0.275544	2.79656	-0.615181	0.673631	3.04165	-1.15878	-0.60294	-0.48706	-0.0264787	-1.16011	-0.289614	-0.0278625	0.642028	0.852993	-2.47202	0.40984	-0.65836	0.689185	0.718153	0.154154	-0.877801	-0.497776	-0.811038	-0.0913099	-1.35944	2.6146	-0.501137	-2.06245	-1.28457	-0.00777717	0.688426
SKMEL2 PPP2R3B OE 6h	Human cell lines	-0.108264	1.008	1.60486	2.04485	1.65836	0.310688	2.38988	0.868067	1.35687	3.03999	-0.884796	-0.162131	-0.565224	1.43192	1.16025	0.0256162	0.362429	-0.223479	2.63651	-0.591348	0.695302	3.0163	-1.10367	-0.516979	-0.41737	-0.012509	-1.13266	-0.213574	0.0052582	0.649782	0.850571	-2.46691	0.391338	-0.611679	0.596798	0.759286	0.26246	-0.766376	-0.455843	-0.817084	-0.160338	-1.59295	2.57301	-0.42073	-1.98826	-1.19543	0.0187989	0.560028
SKMEL2 PPP2R3B OE 16h	Human cell lines	-0.186464	0.902088	1.42642	1.86784	1.53016	0.167852	2.17378	0.584034	1.23128	2.88576	-1.19391	-0.333806	-0.761275	1.23126	0.943484	-0.157782	0.286444	-0.342879	2.4271	-0.739091	0.589237	2.88705	-1.20985	-0.67829	-0.555754	-0.318512	-1.21351	-0.381025	-0.0668478	0.529627	0.650793	-2.59106	0.288884	-0.812588	0.482052	0.646283	-0.0971298	-1.00017	-0.590971	-1.04936	-0.173861	-1.47388	2.41662	-0.549385	-2.08633	-1.3129	-0.136219	0.482967
SKMEL2 UNINDUCED	Human cell lines	-0.212499	0.856917	1.39893	1.91775	1.45832	0.15314	2.20917	0.616592	1.20699	2.85663	-1.62428	-0.506255	-0.716627	1.2917	1.05697	-0.0610976	0.22919	-0.353485	2.43894	-0.725181	0.587414	2.79599	-1.22139	-0.661494	-0.555501	-0.152685	-1.20285	-0.372451	-0.119445	0.559398	0.708876	-2.56053	0.356552	-0.779021	0.498166	0.608598	0.016141	-0.946897	-0.643504	-0.990942	-0.207135	-1.50914	2.33501	-0.621658	-2.11339	-1.38118	-0.0754006	0.473452
SKMEL2 PPP2R3B OE 6h	Human cell lines	-0.102663	0.946047	1.47714	1.98822	1.53586	0.222	2.26925	0.760435	1.30528	2.88699	-1.39362	-0.325404	-0.652542	1.37549	1.18931	-0.029142	0.29343	-0.255433	2.42532	-0.64713	0.655763	2.86246	-1.12485	-0.55159	-0.470099	-0.0398492	-1.15133	-0.300162	-0.00901823	0.575591	0.82577	-2.54193	0.404368	-0.692376	0.582951	0.718	0.161969	-0.877514	-0.495215	-0.87989	-0.172703	-1.37161	2.40982	-0.50062	-1.99891	-1.2354	-0.105736	0.493066
SKMEL2 PPP2R3B OE 16h	Human cell lines	-0.153113	0.91732	1.5101	1.99118	1.6402	0.232769	2.28981	0.757734	1.28327	2.97498	-1.34333	-0.339093	-0.603813	1.36194	1.18434	-0.0964949	0.320539	-0.231812	2.66955	-0.699586	0.626087	2.97829	-1.09657	-0.546982	-0.483529	-0.166189	-1.13941	-0.323371	0.0154274	0.624851	0.800088	-2.49297	0.391615	-0.751372	0.511446	0.700945	0.178809	-0.987912	-0.565367	-0.887305	-0.105703	-1.52627	2.46982	-0.487658	-2.02678	-1.22835	-0.0353188	0.503518
[truncated: 249 more columns]

## Sheet: SKMEL2 NormLinear
	Antibody Name	14-3-3-beta	14-3-3-zeta	4E-BP1	4E-BP1_pS65	53BP1	A-Raf	ACC1	ACC_pS79	ADAR1	Akt	Akt_pS473	Akt_pT308	AMPK-a2_pS345	AMPKa	AMPKa_pT172	Annexin-I	Annexin-VII	AR	ARID1A	Atg3	Atg7	ATM	ATM_pS1981	ATR_pS428	Aurora-B	Axl	b-Actin	b-Catenin	b-Catenin_pT41_S45	B-Raf	B-Raf_pS445	B7-H4	Bad_pS112	Bak	BAP1	Bax	Bcl-xL	Bcl2	Beclin	Bid	Bim	BiP-GRP78	BRD4	c-Abl	c-IAP2	c-Jun_pS73	c-Kit	c-Myc
	Antibody Origin	R	R	R	R	R	R	R	R	M	R	R	R	R	R	R	M	M	R	R	R	R	R	R	R	R	R	R	R	R	R	R	R	R	R	M	R	R	M	G	R	R	M	R	R	R	R	R	R
	Gene Name	YWHAB	YWHAZ	EIF4EBP1	EIF4EBP1	TP53BP1	ARAF	ACACA	ACACA	ADAR	AKT1	AKT1	AKT1	PRKAA2	PRKAA1	PRKAA1	ANXA1	ANXA7	AR	ARID1A	ATG3	ATG7	ATM	ATM	ATR	AIM1	AXL	ACTB	CTNNB1	CTNNB1	BRAF	BRAF	VTCN1	BAD	BAK1	BAP1	BAX	BCL2L1	BCL2	BECN1	BID	BCL2L11	HSPA5	BRD4	ABL1	BIRC3	JUN	KIT	MYC
	Validation Status	V	V	V	V	V	V	C	V	V	V	V	V	V	C	C	V	V	V	C	V	V	V	V	C	V	V	C	V	V	C	V	C	V	C	V	V	V	V	C	C	V	C	V	V	C	V	V	C
	Slide Id	GBL1106377	GBL1106378	GBL1106144	GBL1106145	GBL1106236	GBL1106289	GBL1106462	GBL1106146	GBL1106403	GBL1106257	GBL1106170	GBL1106276	GBL1106309	GBL1106148	GBL1106149	GBL1106406	GBL1106402	GBL1106217	GBL1106322	GBL1106329	GBL1106330	GBL1106311	GBL1106312	GBL1106353	GBL1106319	GBL1106301	GBL1106282	GBL1106153	GBL1106283	GBL1106366	GBL1106157	GBL1106348	GBL1106150	GBL1106453	GBL1106429	GBL1106152	GBL1106154	GBL1106484	GBL1106451	GBL1106155	GBL1106156	GBL1106477	GBL1106325	GBL1106324	GBL1106331	GBL1106163	GBL1106454	GBL1106380
	Antibody Name in Heatmap	14-3-3-beta-R-V	14-3-3-zeta-R-V	4E-BP1-R-V	4E-BP1_pS65-R-V	53BP1-R-V	A-Raf-R-V	ACC1-R-C	ACC_pS79-R-V	ADAR1-M-V	Akt-R-V	Akt_pS473-R-V	Akt_pT308-R-V	AMPK-a2_pS345-R-V	AMPKa-R-C	AMPKa_pT172-R-C	Annexin-I-M-V	Annexin-VII-M-V	AR-R-V	ARID1A-R-C	Atg3-R-V	Atg7-R-V	ATM-R-V	ATM_pS1981-R-V	ATR_pS428-R-C	Aurora-B-R-V	Axl-R-V	b-Actin-R-C	b-Catenin-R-V	b-Catenin_pT41_S45-R-V	B-Raf-R-C	B-Raf_pS445-R-V	B7-H4-R-C	Bad_pS112-R-V	Bak-R-C	BAP1-M-V	Bax-R-V	Bcl-xL-R-V	Bcl2-M-V	Beclin-G-C	Bid-R-C	Bim-R-V	BiP-GRP78-M-C	BRD4-R-V	c-Abl-R-V	c-IAP2-R-C	c-Jun_pS73-R-V	c-Kit-R-V	c-Myc-R-C
	Probabilities (QC Score)	0.96012	0.970998	0.970697	0.965747	0.962192	0.968739	0.936665	0.962107	0.9619	0.968376	0.950891	0.965286	0.92298	0.96823	0.966847	0.89762	0.931514	0.941264	0.965541	0.929535	0.956583	0.971676	0.921248	0.956265	0.953827	0.966569	0.904157	0.9633	0.956814	0.963691	0.965826	0.89481	0.967993	0.914888	0.928461	0.951794	0.937543	0.889365	0.928658	0.940865	0.940423	0.82534	0.961683	0.9129	0.911602	0.947257	0.915797	0.957234
	Slide no.	1	2	3	4	5	6	7	8	9	10	11	12	13	14	15	16	17	18	19	20	21	22	23	24	25	26	27	28	29	30	31	32	33	34	35	36	37	38	39	40	41	42	43	44	45	46	47	48
Sample description	Sample Type	14-3-3-beta-R-V	14-3-3-zeta-R-V	4E-BP1-R-V	4E-BP1_pS65-R-V	53BP1-R-V	A-Raf-R-V	ACC1-R-C	ACC_pS79-R-V	ADAR1-M-V	Akt-R-V	Akt_pS473-R-V	Akt_pT308-R-V	AMPK-a2_pS345-R-V	AMPKa-R-C	AMPKa_pT172-R-C	Annexin-I-M-V	Annexin-VII-M-V	AR-R-V	ARID1A-R-C	Atg3-R-V	Atg7-R-V	ATM-R-V	ATM_pS1981-R-V	ATR_pS428-R-C	Aurora-B-R-V	Axl-R-V	b-Actin-R-C	b-Catenin-R-V	b-Catenin_pT41_S45-R-V	B-Raf-R-C	B-Raf_pS445-R-V	B7-H4-R-C	Bad_pS112-R-V	Bak-R-C	BAP1-M-V	Bax-R-V	Bcl-xL-R-V	Bcl2-M-V	Beclin-G-C	Bid-R-C	Bim-R-V	BiP-GRP78-M-C	BRD4-R-V	c-Abl-R-V	c-IAP2-R-C	c-Jun_pS73-R-V	c-Kit-R-V	c-Myc-R-C
		NormLinear	NormLinear	NormLinear	NormLinear	NormLinear	NormLinear	NormLinear	NormLinear	NormLinear	NormLinear	NormLinear	NormLinear	NormLinear	NormLinear	NormLinear	NormLinear	NormLinear	NormLinear	NormLinear	NormLinear	NormLinear	NormLinear	NormLinear	NormLinear	NormLinear	NormLinear	NormLinear	NormLinear	NormLinear	NormLinear	NormLinear	NormLinear	NormLinear	NormLinear	NormLinear	NormLinear	NormLinear	NormLinear	NormLinear	NormLinear	NormLinear	NormLinear	NormLinear	NormLinear	NormLinear	NormLinear	NormLinear	NormLinear
SKMEL2 UNINDUCED	Human cell lines	0.964344	1.02782	1.01164	1.00246	0.997256	1.01138	1.06914	0.931618	0.993999	1.03567	1.16132	1.06015	0.989347	0.986025	0.962696	1.03567	1.02354	0.97792	1.03567	1.03567	1.01463	0.94829	1.00801	1.00433	0.972686	0.976206	1.02227	0.977705	0.980964	1.02102	0.968771	0.98634	0.977468	1.03567	1.04652	0.958647	0.882323	1.03567	0.997935	0.942358	0.987449	1.03567	1.03567	0.970295	0.990448	1.00554	1.03567	1.04097
SKMEL2 PPP2R3B OE 6h	Human cell lines	0.996745	1.04115	1.04635	1.007	1.00021	1.01352	1.01132	1.00617	0.991715	1.05072	1.35634	1.13061	0.991715	1.00482	1.09443	1.02035	1.00248	0.991776	1.11883	1.02582	0.991715	1.04091	1.02361	1.0297	0.991715	0.983034	0.991715	1.02797	0.998501	1.015	0.991715	0.970711	0.988768	1.02614	0.958429	1.0168	1.0709	1.00697	1.01086	1.00646	0.993171	1.06933	1.06159	0.991715	1.02723	1.02918	1.02513	1.01362
SKMEL2 PPP2R3B OE 16h	Human cell lines	0.976679	1.01731	0.994757	0.943038	1.02577	1.00936	0.977879	0.895516	0.990276	1.05368	1.26373	1.06903	0.965483	0.970596	1.04028	0.974546	1.00246	0.995865	1.0074	0.991701	1.03732	1.07278	1.02045	0.987223	0.980907	0.909737	1.0343	0.987574	0.995851	1.01015	0.952923	0.985743	0.95773	0.976493	1.02082	0.984792	0.865883	0.950413	1.00591	0.908249	1.01651	1.04925	1.04962	1.00231	1.03277	1.00619	1.01325	1.02104
SKMEL2 UNINDUCED	Human cell lines	1.02381	1.05399	1.06264	1.06659	1.05836	1.02692	1.153	0.987089	1.00187	1.10008	0.927689	0.972736	1.00347	1.02569	1.00125	1.00704	1.0474	0.960302	1.14323	1.0104	1.00392	1.0455	0.960302	0.960302	0.963207	1.05795	0.963366	0.983036	0.960302	1.00556	1.01182	1.02106	0.996435	1.02174	1.08621	0.971825	0.960302	0.963725	1.00636	1.01243	1.01604	1.05905	1.09697	0.961782	0.960302	0.960302	1.00035	1.09162
SKMEL2 PPP2R3B OE 6h	Human cell lines	0.966591	0.997792	1.02374	0.974518	1.02004	0.996413	1.0043	1.01148	0.986061	1.01164	1.1609	1.04928	1.00802	0.983576	0.937005	0.990087	0.982907	0.971438	0.998363	1.00231	0.994394	1.00237	0.973489	0.994532	0.986353	1.04233	0.958054	1.0111	0.958765	0.986451	0.985617	0.999827	0.959872	1.02974	0.994112	0.975672	1.01006	1.01585	1.01091	0.98374	0.94507	0.878941	1.03995	0.992236	0.986449	0.996724	0.994225	0.974436
SKMEL2 PPP2R3B OE 16h	Human cell lines	1.01335	1.02616	1.00122	0.954028	1.03296	0.99885	0.956911	0.919414	1.00035	1.00613	1.03705	1.03103	0.973896	0.947245	0.892374	0.964991	1.03204	0.989761	0.955667	1.00135	1.02256	1.01433	1.00098	0.984278	0.991821	0.933139	1.00256	0.996425	1.0094	1.00453	0.94979	1.01534	0.989533	0.991532	1.01614	0.998494	0.871277	0.956109	1.01881	0.926868	1.03622	1.05648	1.03274	1.00449	1.02003	1.01689	0.988276	1.02238
SKMEL2 UNINDUCED	Human cell lines	0.996099	0.995397	0.98319	0.988475	0.983639	0.989579	0.981532	0.941221	0.984514	0.986876	0.770239	0.915668	1.00538	0.988634	0.966252	1.03278	0.992753	0.98337	0.964384	1.01194	1.02216	0.953114	0.993871	0.996674	0.992861	1.04772	1.01088	1.00324	0.974116	1.02637	0.989672	1.03796	1.03796	1.01576	1.02845	0.9736	0.943265	0.992945	0.983237	0.966011	1.01348	1.03187	0.976794	0.956242	1.00195	0.970727	1.03173	1.01655
SKMEL2 PPP2R3B OE 6h	Human cell lines	1.01906	1.00383	0.984042	0.984042	0.984042	0.984042	0.970116	0.985886	0.999182	0.955515	0.856825	0.984042	0.996455	0.993333	1.00406	1.00106	0.984042	0.997855	0.9057	1.0127	1.01608	0.946214	1.00746	1.0197	0.998691	1.0741	0.99321	1	0.996979	0.984042	1.01745	0.996813	1.0172	1.0226	1.03404	0.995744	0.989387	0.987746	1.03307	0.989112	0.984042	1.07611	0.975343	0.985911	1.02835	1.01816	0.957784	0.976938
SKMEL2 PPP2R3B OE 16h	Human cell lines	0.981394	0.981394	1.00408	0.983408	1.055	0.988747	0.981394	0.981394	0.981404	1.01288	0.884834	0.972126	1.02791	0.981394	0.997919	0.952831	1.00001	1.0116	1.06988	0.973917	0.992714	1.02256	1.02463	1.02021	0.986775	0.981394	0.998756	0.981394	1.01129	1.01548	0.996811	1.02845	1.00554	0.978988	0.981394	0.981394	0.99831	0.912519	0.981394	0.981394	1.02805	0.964122	1.01403	0.992132	1.00596	1.02039	1.00299	0.981394
[truncated: 251 more columns]

## Sheet: SKMEL2 NormLog2
	Antibody Name	14-3-3-beta	14-3-3-zeta	4E-BP1	4E-BP1_pS65	53BP1	A-Raf	ACC1	ACC_pS79	ADAR1	Akt	Akt_pS473	Akt_pT308	AMPK-a2_pS345	AMPKa	AMPKa_pT172	Annexin-I	Annexin-VII	AR	ARID1A	Atg3	Atg7	ATM	ATM_pS1981	ATR_pS428	Aurora-B	Axl	b-Actin	b-Catenin	b-Catenin_pT41_S45	B-Raf	B-Raf_pS445	B7-H4	Bad_pS112	Bak	BAP1	Bax	Bcl-xL	Bcl2	Beclin	Bid	Bim	BiP-GRP78	BRD4	c-Abl	c-IAP2	c-Jun_pS73	c-Kit	c-Myc
	Antibody Origin	R	R	R	R	R	R	R	R	M	R	R	R	R	R	R	M	M	R	R	R	R	R	R	R	R	R	R	R	R	R	R	R	R	R	M	R	R	M	G	R	R	M	R	R	R	R	R	R
	Gene Name	YWHAB	YWHAZ	EIF4EBP1	EIF4EBP1	TP53BP1	ARAF	ACACA	ACACA	ADAR	AKT1	AKT1	AKT1	PRKAA2	PRKAA1	PRKAA1	ANXA1	ANXA7	AR	ARID1A	ATG3	ATG7	ATM	ATM	ATR	AIM1	AXL	ACTB	CTNNB1	CTNNB1	BRAF	BRAF	VTCN1	BAD	BAK1	BAP1	BAX	BCL2L1	BCL2	BECN1	BID	BCL2L11	HSPA5	BRD4	ABL1	BIRC3	JUN	KIT	MYC
	Validation Status	V	V	V	V	V	V	C	V	V	V	V	V	V	C	C	V	V	V	C	V	V	V	V	C	V	V	C	V	V	C	V	C	V	C	V	V	V	V	C	C	V	C	V	V	C	V	V	C
	Slide Id	GBL1106377	GBL1106378	GBL1106144	GBL1106145	GBL1106236	GBL1106289	GBL1106462	GBL1106146	GBL1106403	GBL1106257	GBL1106170	GBL1106276	GBL1106309	GBL1106148	GBL1106149	GBL1106406	GBL1106402	GBL1106217	GBL1106322	GBL1106329	GBL1106330	GBL1106311	GBL1106312	GBL1106353	GBL1106319	GBL1106301	GBL1106282	GBL1106153	GBL1106283	GBL1106366	GBL1106157	GBL1106348	GBL1106150	GBL1106453	GBL1106429	GBL1106152	GBL1106154	GBL1106484	GBL1106451	GBL1106155	GBL1106156	GBL1106477	GBL1106325	GBL1106324	GBL1106331	GBL1106163	GBL1106454	GBL1106380
	Antibody Name in Heatmap	14-3-3-beta-R-V	14-3-3-zeta-R-V	4E-BP1-R-V	4E-BP1_pS65-R-V	53BP1-R-V	A-Raf-R-V	ACC1-R-C	ACC_pS79-R-V	ADAR1-M-V	Akt-R-V	Akt_pS473-R-V	Akt_pT308-R-V	AMPK-a2_pS345-R-V	AMPKa-R-C	AMPKa_pT172-R-C	Annexin-I-M-V	Annexin-VII-M-V	AR-R-V	ARID1A-R-C	Atg3-R-V	Atg7-R-V	ATM-R-V	ATM_pS1981-R-V	ATR_pS428-R-C	Aurora-B-R-V	Axl-R-V	b-Actin-R-C	b-Catenin-R-V	b-Catenin_pT41_S45-R-V	B-Raf-R-C	B-Raf_pS445-R-V	B7-H4-R-C	Bad_pS112-R-V	Bak-R-C	BAP1-M-V	Bax-R-V	Bcl-xL-R-V	Bcl2-M-V	Beclin-G-C	Bid-R-C	Bim-R-V	BiP-GRP78-M-C	BRD4-R-V	c-Abl-R-V	c-IAP2-R-C	c-Jun_pS73-R-V	c-Kit-R-V	c-Myc-R-C
	Probabilities (QC Score)	0.96012	0.970998	0.970697	0.965747	0.962192	0.968739	0.936665	0.962107	0.9619	0.968376	0.950891	0.965286	0.92298	0.96823	0.966847	0.89762	0.931514	0.941264	0.965541	0.929535	0.956583	0.971676	0.921248	0.956265	0.953827	0.966569	0.904157	0.9633	0.956814	0.963691	0.965826	0.89481	0.967993	0.914888	0.928461	0.951794	0.937543	0.889365	0.928658	0.940865	0.940423	0.82534	0.961683	0.9129	0.911602	0.947257	0.915797	0.957234
	Slide no.	1	2	3	4	5	6	7	8	9	10	11	12	13	14	15	16	17	18	19	20	21	22	23	24	25	26	27	28	29	30	31	32	33	34	35	36	37	38	39	40	41	42	43	44	45	46	47	48
Sample description	Sample Type	14-3-3-beta-R-V	14-3-3-zeta-R-V	4E-BP1-R-V	4E-BP1_pS65-R-V	53BP1-R-V	A-Raf-R-V	ACC1-R-C	ACC_pS79-R-V	ADAR1-M-V	Akt-R-V	Akt_pS473-R-V	Akt_pT308-R-V	AMPK-a2_pS345-R-V	AMPKa-R-C	AMPKa_pT172-R-C	Annexin-I-M-V	Annexin-VII-M-V	AR-R-V	ARID1A-R-C	Atg3-R-V	Atg7-R-V	ATM-R-V	ATM_pS1981-R-V	ATR_pS428-R-C	Aurora-B-R-V	Axl-R-V	b-Actin-R-C	b-Catenin-R-V	b-Catenin_pT41_S45-R-V	B-Raf-R-C	B-Raf_pS445-R-V	B7-H4-R-C	Bad_pS112-R-V	Bak-R-C	BAP1-M-V	Bax-R-V	Bcl-xL-R-V	Bcl2-M-V	Beclin-G-C	Bid-R-C	Bim-R-V	BiP-GRP78-M-C	BRD4-R-V	c-Abl-R-V	c-IAP2-R-C	c-Jun_pS73-R-V	c-Kit-R-V	c-Myc-R-C
		NormLog2	NormLog2	NormLog2	NormLog2	NormLog2	NormLog2	NormLog2	NormLog2	NormLog2	NormLog2	NormLog2	NormLog2	NormLog2	NormLog2	NormLog2	NormLog2	NormLog2	NormLog2	NormLog2	NormLog2	NormLog2	NormLog2	NormLog2	NormLog2	NormLog2	NormLog2	NormLog2	NormLog2	NormLog2	NormLog2	NormLog2	NormLog2	NormLog2	NormLog2	NormLog2	NormLog2	NormLog2	NormLog2	NormLog2	NormLog2	NormLog2	NormLog2	NormLog2	NormLog2	NormLog2	NormLog2	NormLog2	NormLog2
SKMEL2 UNINDUCED	Human cell lines	-0.0523808	0.0395887	0.016695	0.00354033	-0.00396372	0.0163249	0.0964563	-0.10219	-0.00868438	0.0505586	0.21577	0.0842677	-0.0154508	-0.0203041	-0.0548477	0.0505586	0.0335717	-0.0322114	0.0505586	0.0505586	0.0209534	-0.0766003	0.0115049	0.00623441	-0.0399541	-0.0347429	0.0317702	-0.0325286	-0.0277286	0.0300078	-0.0457725	-0.0198435	-0.0328782	0.0505586	0.0656025	-0.0609289	-0.180621	0.0505586	-0.0029821	-0.0856522	-0.0182213	0.0505586	0.0505586	-0.0435053	-0.0138462	0.00797041	0.0505586	0.0579329
SKMEL2 PPP2R3B OE 6h	Human cell lines	-0.00470401	0.0581824	0.0653712	0.0100653	0.000303721	0.0193686	0.0162397	0.0088742	-0.0120027	0.0713746	0.439724	0.177105	-0.0120027	0.00693955	0.130176	0.0290702	0.00357201	-0.011914	0.161997	0.0367819	-0.0120027	0.0578426	0.0336602	0.0422279	-0.0120027	-0.0246865	-0.0120027	0.0398007	-0.00216396	0.0214793	-0.0120027	-0.0428868	-0.0162955	0.0372218	-0.0612565	0.0240359	0.0988207	0.0100145	0.0155821	0.00929455	-0.00988561	0.0967043	0.0862263	-0.0120027	0.0387622	0.0415016	0.0358133	0.0195126
SKMEL2 PPP2R3B OE 16h	Human cell lines	-0.0340443	0.024764	-0.00758431	-0.0846127	0.0367138	0.0134349	-0.032272	-0.159209	-0.0140969	0.0754365	0.337692	0.096304	-0.0506779	-0.0430576	0.0569785	-0.0371974	0.00354515	-0.00597833	0.0106406	-0.0120231	0.0528632	0.10135	0.0292109	-0.0185525	-0.0278111	-0.136478	0.0486497	-0.0180397	-0.00599757	0.0145744	-0.0695682	-0.0207161	-0.0623089	-0.0343187	0.0297334	-0.0221094	-0.207756	-0.0733741	0.00850396	-0.138841	0.0236292	0.0693647	0.0698623	0.0033291	0.0465252	0.00890919	0.0189839	0.0300425
SKMEL2 UNINDUCED	Human cell lines	0.0339524	0.0758582	0.0876524	0.0930023	0.0818301	0.0383275	0.20539	-0.0187485	0.00269281	0.137607	-0.108287	-0.0398799	0.00500422	0.0365893	0.00180697	0.0101166	0.066806	-0.0584401	0.19312	0.0149307	0.00565	0.0641998	-0.0584401	-0.0584401	-0.0540826	0.08127	-0.0538445	-0.0246836	-0.0584401	0.00799663	0.0169525	0.0300725	-0.00515214	0.0310307	0.1193	-0.0412319	-0.0584401	-0.0533068	0.00915083	0.0178271	0.0229531	0.0827723	0.133527	-0.0562187	-0.0584401	-0.0584401	0.000499751	0.126468
SKMEL2 PPP2R3B OE 6h	Human cell lines	-0.0490231	-0.00318946	0.0338472	-0.0372388	0.0286264	-0.00518445	0.00619555	0.0164615	-0.0202506	0.0166899	0.215238	0.069401	0.0115313	-0.0238911	-0.0938718	-0.0143733	-0.0248726	-0.0418068	-0.00236413	0.00333252	-0.00811039	0.00341449	-0.0387637	-0.00791096	-0.0198243	0.059808	-0.0618216	0.0159252	-0.0607511	-0.0196803	-0.0209008	-0.000249944	-0.0590857	0.04228	-0.00851933	-0.0355312	0.0144342	0.022687	0.0156523	-0.0236511	-0.081507	-0.186161	0.0565129	-0.0112441	-0.0196835	-0.00473381	-0.0083558	-0.0373613
SKMEL2 PPP2R3B OE 16h	Human cell lines	0.0191369	0.0372555	0.00176492	-0.0678967	0.0467875	-0.00166042	-0.0635431	-0.121213	0.000510734	0.00881929	0.0524875	0.0440854	-0.0381599	-0.0781902	-0.16428	-0.0514124	0.0455012	-0.0148475	-0.0654199	0.00194925	0.0321839	0.0205258	0.00141244	-0.0228621	-0.0118489	-0.0998356	0.00368194	-0.00516637	0.0135022	0.00652381	-0.0743201	0.0219601	-0.0151802	-0.0122694	0.0230938	-0.00217496	-0.198796	-0.0647529	0.0268834	-0.109564	0.0513298	0.0792662	0.0464757	0.00646055	0.0286137	0.0241578	-0.0170142	0.031937
SKMEL2 UNINDUCED	Human cell lines	-0.00563891	-0.00665557	-0.0244578	-0.0167233	-0.0237992	-0.0151131	-0.0268929	-0.0873944	-0.022516	-0.019059	-0.376622	-0.127104	0.00774768	-0.016492	-0.0495291	0.0465321	-0.0104926	-0.024194	-0.0523201	0.0171188	0.0316209	-0.0692787	-0.00886951	-0.0048063	-0.0103357	0.0672514	0.015608	0.00466658	-0.037835	0.0375549	-0.014977	0.0537474	0.0537474	0.0225576	0.0404683	-0.0385995	-0.0842653	-0.010215	-0.0243893	-0.0498892	0.0193155	0.0452665	-0.0338731	-0.0645526	0.00280828	-0.0428618	0.0450638	0.023682
SKMEL2 PPP2R3B OE 6h	Human cell lines	0.0272411	0.00551768	-0.0232089	-0.0232089	-0.0232089	-0.0232089	-0.0437706	-0.0205079	-0.0011806	-0.06565	-0.222927	-0.0232089	-0.00512361	-0.00965134	0.00585247	0.00153139	-0.0232089	-0.00309837	-0.142895	0.0182138	0.0230129	-0.079761	0.0107207	0.028141	-0.00189023	0.103131	-0.00982878	0	-0.00436464	-0.0232089	0.0249607	-0.00460515	0.0246075	0.0322459	0.0482962	-0.00615392	-0.0153937	-0.0177882	0.046943	-0.0157943	-0.0232089	0.105832	-0.0360181	-0.0204708	0.040335	0.0259595	-0.0622279	-0.0336607
SKMEL2 PPP2R3B OE 16h	Human cell lines	-0.0270958	-0.0270958	0.00586863	-0.0241374	0.0772372	-0.0163269	-0.0270958	-0.0270958	-0.0270816	0.0184565	-0.176521	-0.0407854	0.0397181	-0.0270958	-0.00300605	-0.0697085	1.32696e-05	0.0166361	0.0974495	-0.0381292	-0.0105499	0.0321786	0.0351092	0.0288626	-0.0192073	-0.0270958	-0.00179514	-0.0270958	0.0161941	0.0221646	-0.00460808	0.0404668	0.00796745	-0.0306371	-0.0270958	-0.0270958	-0.00244071	-0.132074	-0.0270958	-0.0270958	0.0399041	-0.0527128	0.0201	-0.0113955	0.00857713	0.0291199	0.0043024	-0.0270958
[truncated: 249 more columns]

## Sheet: SKMEL2 NormLog2_MedianCentered
	Antibody Name	14-3-3-beta	14-3-3-zeta	4E-BP1	4E-BP1_pS65	53BP1	A-Raf	ACC1	ACC_pS79	ADAR1	Akt	Akt_pS473	Akt_pT308	AMPK-a2_pS345	AMPKa	AMPKa_pT172	Annexin-I	Annexin-VII	AR	ARID1A	Atg3	Atg7	ATM	ATM_pS1981	ATR_pS428	Aurora-B	Axl	b-Actin	b-Catenin	b-Catenin_pT41_S45	B-Raf	B-Raf_pS445	B7-H4	Bad_pS112	Bak	BAP1	Bax	Bcl-xL	Bcl2	Beclin	Bid	Bim	BiP-GRP78	BRD4	c-Abl	c-IAP2	c-Jun_pS73	c-Kit	c-Myc
	Antibody Origin	R	R	R	R	R	R	R	R	M	R	R	R	R	R	R	M	M	R	R	R	R	R	R	R	R	R	R	R	R	R	R	R	R	R	M	R	R	M	G	R	R	M	R	R	R	R	R	R
	Gene Name	YWHAB	YWHAZ	EIF4EBP1	EIF4EBP1	TP53BP1	ARAF	ACACA	ACACA	ADAR	AKT1	AKT1	AKT1	PRKAA2	PRKAA1	PRKAA1	ANXA1	ANXA7	AR	ARID1A	ATG3	ATG7	ATM	ATM	ATR	AIM1	AXL	ACTB	CTNNB1	CTNNB1	BRAF	BRAF	VTCN1	BAD	BAK1	BAP1	BAX	BCL2L1	BCL2	BECN1	BID	BCL2L11	HSPA5	BRD4	ABL1	BIRC3	JUN	KIT	MYC
	Validation Status	V	V	V	V	V	V	C	V	V	V	V	V	V	C	C	V	V	V	C	V	V	V	V	C	V	V	C	V	V	C	V	C	V	C	V	V	V	V	C	C	V	C	V	V	C	V	V	C
	Slide Id	GBL1106377	GBL1106378	GBL1106144	GBL1106145	GBL1106236	GBL1106289	GBL1106462	GBL1106146	GBL1106403	GBL1106257	GBL1106170	GBL1106276	GBL1106309	GBL1106148	GBL1106149	GBL1106406	GBL1106402	GBL1106217	GBL1106322	GBL1106329	GBL1106330	GBL1106311	GBL1106312	GBL1106353	GBL1106319	GBL1106301	GBL1106282	GBL1106153	GBL1106283	GBL1106366	GBL1106157	GBL1106348	GBL1106150	GBL1106453	GBL1106429	GBL1106152	GBL1106154	GBL1106484	GBL1106451	GBL1106155	GBL1106156	GBL1106477	GBL1106325	GBL1106324	GBL1106331	GBL1106163	GBL1106454	GBL1106380
	Antibody Name in Heatmap	14-3-3-beta-R-V	14-3-3-zeta-R-V	4E-BP1-R-V	4E-BP1_pS65-R-V	53BP1-R-V	A-Raf-R-V	ACC1-R-C	ACC_pS79-R-V	ADAR1-M-V	Akt-R-V	Akt_pS473-R-V	Akt_pT308-R-V	AMPK-a2_pS345-R-V	AMPKa-R-C	AMPKa_pT172-R-C	Annexin-I-M-V	Annexin-VII-M-V	AR-R-V	ARID1A-R-C	Atg3-R-V	Atg7-R-V	ATM-R-V	ATM_pS1981-R-V	ATR_pS428-R-C	Aurora-B-R-V	Axl-R-V	b-Actin-R-C	b-Catenin-R-V	b-Catenin_pT41_S45-R-V	B-Raf-R-C	B-Raf_pS445-R-V	B7-H4-R-C	Bad_pS112-R-V	Bak-R-C	BAP1-M-V	Bax-R-V	Bcl-xL-R-V	Bcl2-M-V	Beclin-G-C	Bid-R-C	Bim-R-V	BiP-GRP78-M-C	BRD4-R-V	c-Abl-R-V	c-IAP2-R-C	c-Jun_pS73-R-V	c-Kit-R-V	c-Myc-R-C
	Probabilities (QC Score)	0.96012	0.970998	0.970697	0.965747	0.962192	0.968739	0.936665	0.962107	0.9619	0.968376	0.950891	0.965286	0.92298	0.96823	0.966847	0.89762	0.931514	0.941264	0.965541	0.929535	0.956583	0.971676	0.921248	0.956265	0.953827	0.966569	0.904157	0.9633	0.956814	0.963691	0.965826	0.89481	0.967993	0.914888	0.928461	0.951794	0.937543	0.889365	0.928658	0.940865	0.940423	0.82534	0.961683	0.9129	0.911602	0.947257	0.915797	0.957234
	Slide no.	1	2	3	4	5	6	7	8	9	10	11	12	13	14	15	16	17	18	19	20	21	22	23	24	25	26	27	28	29	30	31	32	33	34	35	36	37	38	39	40	41	42	43	44	45	46	47	48
Sample description	Sample Type	14-3-3-beta-R-V	14-3-3-zeta-R-V	4E-BP1-R-V	4E-BP1_pS65-R-V	53BP1-R-V	A-Raf-R-V	ACC1-R-C	ACC_pS79-R-V	ADAR1-M-V	Akt-R-V	Akt_pS473-R-V	Akt_pT308-R-V	AMPK-a2_pS345-R-V	AMPKa-R-C	AMPKa_pT172-R-C	Annexin-I-M-V	Annexin-VII-M-V	AR-R-V	ARID1A-R-C	Atg3-R-V	Atg7-R-V	ATM-R-V	ATM_pS1981-R-V	ATR_pS428-R-C	Aurora-B-R-V	Axl-R-V	b-Actin-R-C	b-Catenin-R-V	b-Catenin_pT41_S45-R-V	B-Raf-R-C	B-Raf_pS445-R-V	B7-H4-R-C	Bad_pS112-R-V	Bak-R-C	BAP1-M-V	Bax-R-V	Bcl-xL-R-V	Bcl2-M-V	Beclin-G-C	Bid-R-C	Bim-R-V	BiP-GRP78-M-C	BRD4-R-V	c-Abl-R-V	c-IAP2-R-C	c-Jun_pS73-R-V	c-Kit-R-V	c-Myc-R-C
		Median-Centered	Median-Centered	Median-Centered	Median-Centered	Median-Centered	Median-Centered	Median-Centered	Median-Centered	Median-Centered	Median-Centered	Median-Centered	Median-Centered	Median-Centered	Median-Centered	Median-Centered	Median-Centered	Median-Centered	Median-Centered	Median-Centered	Median-Centered	Median-Centered	Median-Centered	Median-Centered	Median-Centered	Median-Centered	Median-Centered	Median-Centered	Median-Centered	Median-Centered	Median-Centered	Median-Centered	Median-Centered	Median-Centered	Median-Centered	Median-Centered	Median-Centered	Median-Centered	Median-Centered	Median-Centered	Median-Centered	Median-Centered	Median-Centered	Median-Centered	Median-Centered	Median-Centered	Median-Centered	Median-Centered	Median-Centered
SKMEL2 UNINDUCED	Human cell lines	-0.0467419	0.0148246	0.0108264	0.0267493	-0.0325901	0.0179853	0.123349	-0.0750942	0.00331829	0.0321022	0.163283	0.0401823	-0.0103272	0	-0.0518416	0.0490273	0.0300266	-0.0173639	0.039918	0.0356279	0	-0.0971261	0.000784288	0.0110407	-0.0207467	-0.0100563	0.0335653	-0.0273622	-0.021731	0.0154334	-0.0307955	-0.0195935	-0.0176979	0.0195279	0.0358691	-0.0338331	-0.12218	0.0683469	-0.0121329	-0.0585564	-0.0375368	-0.018806	0	-0.0315027	-0.0224233	-0.000938774	0.0462562	0.034251
SKMEL2 PPP2R3B OE 6h	Human cell lines	0.000934902	0.0334184	0.0595025	0.0332743	-0.0283226	0.021029	0.0431325	0.03597	0	0.0529182	0.387236	0.13302	-0.00687906	0.0272436	0.133182	0.0275388	2.68631e-05	0.00293353	0.151357	0.0218512	-0.032956	0.0373168	0.0229395	0.0470342	0.00720467	0	-0.0102075	0.0449671	0.00383361	0.00690496	0.00297432	-0.0426368	-0.00111529	0.00619107	-0.0909899	0.0511317	0.157261	0.0278028	0.00643129	0.0363904	-0.0292012	0.0273397	0.0356676	0	0.030185	0.0325924	0.0315109	-0.00416937
SKMEL2 PPP2R3B OE 16h	Human cell lines	-0.0284054	0	-0.0134529	-0.0614038	0.00808747	0.0150953	-0.00537917	-0.132113	-0.00209427	0.05698	0.285205	0.0522186	-0.0455543	-0.0227536	0.0599845	-0.0387288	0	0.00886918	0	-0.0269539	0.0319098	0.0808243	0.0184902	-0.0137462	-0.00860374	-0.111792	0.0504448	-0.0128734	0	0	-0.0545912	-0.0204662	-0.0471286	-0.0653494	0	0.00498644	-0.149316	-0.0555858	-0.000646876	-0.111745	0.00431364	0	0.0193036	0.0153318	0.0379481	0	0.0146815	0.00636056
SKMEL2 UNINDUCED	Human cell lines	0.0395913	0.0510942	0.0817838	0.116211	0.0532037	0.039988	0.232282	0.00834733	0.0146955	0.119151	-0.160774	-0.0839653	0.0101278	0.0568934	0.00481302	0.00858523	0.0632608	-0.0435926	0.182479	0	-0.0153034	0.0436741	-0.0691608	-0.0536338	-0.0348753	0.105957	-0.0520494	-0.0195173	-0.0524425	-0.00657775	0.0319295	0.0303225	0.0100281	0	0.0895661	-0.0141361	0	-0.0355186	0	0.0449229	0.00363754	0.0134076	0.0829682	-0.0442161	-0.0670173	-0.0673493	-0.00380265	0.102786
SKMEL2 PPP2R3B OE 6h	Human cell lines	-0.0433842	-0.0279535	0.0279786	-0.0140299	0	-0.00352403	0.0330884	0.0435573	-0.00824788	-0.00176658	0.162751	0.0253157	0.0166549	-0.003587	-0.0908657	-0.0159047	-0.0284177	-0.0269593	-0.0130047	-0.0115982	-0.0290638	-0.0171113	-0.0494843	-0.00310466	-0.000616988	0.0844945	-0.0600264	0.0210916	-0.0547535	-0.0342547	-0.00592383	0	-0.0439055	0.0112493	-0.0382528	-0.0084354	0.0728743	0.0404753	0.00650149	0.00344467	-0.100823	-0.255526	0.00595422	0.000758561	-0.0282606	-0.013643	-0.0126582	-0.0610433
SKMEL2 PPP2R3B OE 16h	Human cell lines	0.0247758	0.0124915	-0.00410371	-0.0446878	0.0181612	0	-0.0366502	-0.0941171	0.0125134	-0.00963717	0	0	-0.0330362	-0.0578861	-0.161274	-0.0529437	0.041956	0	-0.0760605	-0.0129815	0.0112306	0	-0.00930821	-0.0180558	0.00735847	-0.075149	0.00547708	0	0.0194998	-0.00805057	-0.0593431	0.0222101	0	-0.0433001	-0.00663964	0.0249209	-0.140356	-0.0469647	0.0177326	-0.0824681	0.0320142	0.00990155	-0.00408296	0.0184632	0.0200366	0.0152486	-0.0213166	0.00825503
SKMEL2 UNINDUCED	Human cell lines	0	-0.0314196	-0.0303264	0.00648558	-0.0524255	-0.0134527	0	-0.0602986	-0.0105133	-0.0375154	-0.42911	-0.17119	0.0128713	0.00381207	-0.0465231	0.0450007	-0.0140378	-0.00934651	-0.0629607	0.00218808	0.0106676	-0.0898044	-0.0195902	0	0.00887165	0.0919379	0.0174031	0.00983296	-0.0318374	0.0229806	0	0.0539974	0.0689277	-0.00847312	0.0107348	-0.0115037	-0.0258251	0.00757328	-0.0335401	-0.0227934	0	-0.0240982	-0.0844317	-0.05255	-0.00576885	-0.051771	0.0407614	0
SKMEL2 PPP2R3B OE 6h	Human cell lines	0.03288	-0.0192464	-0.0290776	0	-0.0518353	-0.0215485	-0.0168778	0.00658791	0.0108221	-0.0841065	-0.275414	-0.0672943	0	0.0106527	0.00885852	0	-0.0267541	0.0117491	-0.153535	0.0032831	0.00205954	-0.100287	0	0.0329473	0.0173171	0.127817	-0.00803364	0.00516637	0.00163294	-0.0377833	0.0399377	-0.0043552	0.0397877	0.00121515	0.0185628	0.0209419	0.0430464	0	0.0377922	0.0113015	-0.0425245	0.0364675	-0.0865768	-0.00846811	0.0317579	0.0170503	-0.0665303	-0.0573426
SKMEL2 PPP2R3B OE 16h	Human cell lines	-0.0214569	-0.0518598	0	-0.000928484	0.0486108	-0.0146664	-0.000202954	0	-0.0150789	0	-0.229009	-0.0848708	0.0448417	-0.00679175	0	-0.0712399	-0.00353188	0.0314836	0.0868088	-0.0530599	-0.0315033	0.0116528	0.0243886	0.0336689	0	-0.0024093	0	-0.0219294	0.0221917	0.00759022	0.0103689	0.0407168	0.0231477	-0.0616679	-0.0568293	0	0.0559994	-0.114285	-0.0362466	0	0.0205886	-0.122078	-0.0304586	0.000607153	0	0.0202107	0	-0.0507778
[truncated: 249 more columns]

## Sheet: SKMEL30 RawLog2
	Antibody Name	14-3-3-beta	14-3-3-zeta	4E-BP1	4E-BP1_pS65	53BP1	A-Raf	ACC1	ACC_pS79	ADAR1	Akt	Akt_pS473	Akt_pT308	AMPK-a2_pS345	AMPKa	AMPKa_pT172	Annexin-I	Annexin-VII	AR	ARID1A	Atg3	Atg7	ATM	ATM_pS1981	ATR_pS428	Aurora-B	Axl	b-Actin	b-Catenin	b-Catenin_pT41_S45	B-Raf	B-Raf_pS445	B7-H4	Bad_pS112	Bak	BAP1	Bax	Bcl-xL	Bcl2	Beclin	Bid	Bim	BiP-GRP78	BRD4	c-Abl	c-IAP2	c-Jun_pS73	c-Kit	c-Myc
	Antibody Origin	R	R	R	R	R	R	R	R	M	R	R	R	R	R	R	M	M	R	R	R	R	R	R	R	R	R	R	R	R	R	R	R	R	R	M	R	R	M	G	R	R	M	R	R	R	R	R	R
	Gene Name	YWHAB	YWHAZ	EIF4EBP1	EIF4EBP1	TP53BP1	ARAF	ACACA	ACACA	ADAR	AKT1	AKT1	AKT1	PRKAA2	PRKAA1	PRKAA1	ANXA1	ANXA7	AR	ARID1A	ATG3	ATG7	ATM	ATM	ATR	AIM1	AXL	ACTB	CTNNB1	CTNNB1	BRAF	BRAF	VTCN1	BAD	BAK1	BAP1	BAX	BCL2L1	BCL2	BECN1	BID	BCL2L11	HSPA5	BRD4	ABL1	BIRC3	JUN	KIT	MYC
	Validation Status	V	V	V	V	V	V	C	V	V	V	V	V	V	C	C	V	V	V	C	V	V	V	V	C	V	V	C	V	V	C	V	C	V	C	V	V	V	V	C	C	V	C	V	V	C	V	V	C
	Slide Id	GBL1106377	GBL1106378	GBL1106144	GBL1106145	GBL1106236	GBL1106289	GBL1106462	GBL1106146	GBL1106403	GBL1106257	GBL1106170	GBL1106276	GBL1106309	GBL1106148	GBL1106149	GBL1106406	GBL1106402	GBL1106217	GBL1106322	GBL1106329	GBL1106330	GBL1106311	GBL1106312	GBL1106353	GBL1106319	GBL1106301	GBL1106282	GBL1106153	GBL1106283	GBL1106366	GBL1106157	GBL1106348	GBL1106150	GBL1106453	GBL1106429	GBL1106152	GBL1106154	GBL1106484	GBL1106451	GBL1106155	GBL1106156	GBL1106477	GBL1106325	GBL1106324	GBL1106331	GBL1106163	GBL1106454	GBL1106380
	Antibody Name in Heatmap	14-3-3-beta-R-V	14-3-3-zeta-R-V	4E-BP1-R-V	4E-BP1_pS65-R-V	53BP1-R-V	A-Raf-R-V	ACC1-R-C	ACC_pS79-R-V	ADAR1-M-V	Akt-R-V	Akt_pS473-R-V	Akt_pT308-R-V	AMPK-a2_pS345-R-V	AMPKa-R-C	AMPKa_pT172-R-C	Annexin-I-M-V	Annexin-VII-M-V	AR-R-V	ARID1A-R-C	Atg3-R-V	Atg7-R-V	ATM-R-V	ATM_pS1981-R-V	ATR_pS428-R-C	Aurora-B-R-V	Axl-R-V	b-Actin-R-C	b-Catenin-R-V	b-Catenin_pT41_S45-R-V	B-Raf-R-C	B-Raf_pS445-R-V	B7-H4-R-C	Bad_pS112-R-V	Bak-R-C	BAP1-M-V	Bax-R-V	Bcl-xL-R-V	Bcl2-M-V	Beclin-G-C	Bid-R-C	Bim-R-V	BiP-GRP78-M-C	BRD4-R-V	c-Abl-R-V	c-IAP2-R-C	c-Jun_pS73-R-V	c-Kit-R-V	c-Myc-R-C
	Probabilities (QC Score)	0.96012	0.970998	0.970697	0.965747	0.962192	0.968739	0.936665	0.962107	0.9619	0.968376	0.950891	0.965286	0.92298	0.96823	0.966847	0.89762	0.931514	0.941264	0.965541	0.929535	0.956583	0.971676	0.921248	0.956265	0.953827	0.966569	0.904157	0.9633	0.956814	0.963691	0.965826	0.89481	0.967993	0.914888	0.928461	0.951794	0.937543	0.889365	0.928658	0.940865	0.940423	0.82534	0.961683	0.9129	0.911602	0.947257	0.915797	0.957234
	Slide no.	1	2	3	4	5	6	7	8	9	10	11	12	13	14	15	16	17	18	19	20	21	22	23	24	25	26	27	28	29	30	31	32	33	34	35	36	37	38	39	40	41	42	43	44	45	46	47	48
Sample description	Sample Type	14-3-3-beta-R-V	14-3-3-zeta-R-V	4E-BP1-R-V	4E-BP1_pS65-R-V	53BP1-R-V	A-Raf-R-V	ACC1-R-C	ACC_pS79-R-V	ADAR1-M-V	Akt-R-V	Akt_pS473-R-V	Akt_pT308-R-V	AMPK-a2_pS345-R-V	AMPKa-R-C	AMPKa_pT172-R-C	Annexin-I-M-V	Annexin-VII-M-V	AR-R-V	ARID1A-R-C	Atg3-R-V	Atg7-R-V	ATM-R-V	ATM_pS1981-R-V	ATR_pS428-R-C	Aurora-B-R-V	Axl-R-V	b-Actin-R-C	b-Catenin-R-V	b-Catenin_pT41_S45-R-V	B-Raf-R-C	B-Raf_pS445-R-V	B7-H4-R-C	Bad_pS112-R-V	Bak-R-C	BAP1-M-V	Bax-R-V	Bcl-xL-R-V	Bcl2-M-V	Beclin-G-C	Bid-R-C	Bim-R-V	BiP-GRP78-M-C	BRD4-R-V	c-Abl-R-V	c-IAP2-R-C	c-Jun_pS73-R-V	c-Kit-R-V	c-Myc-R-C
		RawLog2	RawLog2	RawLog2	RawLog2	RawLog2	RawLog2	RawLog2	RawLog2	RawLog2	RawLog2	RawLog2	RawLog2	RawLog2	RawLog2	RawLog2	RawLog2	RawLog2	RawLog2	RawLog2	RawLog2	RawLog2	RawLog2	RawLog2	RawLog2	RawLog2	RawLog2	RawLog2	RawLog2	RawLog2	RawLog2	RawLog2	RawLog2	RawLog2	RawLog2	RawLog2	RawLog2	RawLog2	RawLog2	RawLog2	RawLog2	RawLog2	RawLog2	RawLog2	RawLog2	RawLog2	RawLog2	RawLog2	RawLog2
SKMEL30 UNINDUCED	Human cell lines	-0.201588	1.33108	1.04185	1.88531	0.354276	0.188223	1.7772	-1.12932	1.38156	2.87677	-0.782984	-0.235439	-0.650812	1.08201	0.456874	-0.399172	0.295759	-0.244456	2.1837	-0.910834	-0.0420821	1.9104	-1.31592	-0.764357	-0.136695	-2.31374	-1.2559	2.07859	-0.0356056	0.123195	0.296534	-2.68579	0.501243	-0.85524	0.434283	0.438719	-0.149473	-0.969795	-0.776661	-1.22031	-0.673718	-1.49807	2.45912	-0.802977	-2.42149	-1.29715	-0.0246145	0.215562
SKMEL30 PPP2R3B OE 6h	Human cell lines	-0.288964	1.29524	0.942584	1.80632	0.316178	0.134944	1.7328	-1.11055	1.35944	2.84915	-0.624231	-0.142986	-0.671096	1.07927	0.472615	-0.441165	0.228854	-0.245502	2.20521	-0.948003	-0.0491597	1.90639	-1.35802	-0.741646	-0.164676	-2.37404	-1.31557	2.13164	-0.0455392	0.0128161	0.283863	-2.7874	0.379029	-0.90176	0.393959	0.413509	-0.153727	-1.05611	-0.765285	-1.27035	-0.716081	-1.46335	2.38799	-0.808905	-2.39313	-1.32389	-0.0630906	0.0785723
SKMEL30 PPP2R3B OE 16h	Human cell lines	0.00414908	1.48871	1.34214	2.07135	0.582002	0.332986	1.94142	-0.738944	1.5523	3.13136	-0.351802	0.0856095	-0.433656	1.29558	0.65564	-0.222843	0.40649	0.0539802	2.3325	-0.728298	0.0521236	2.08548	-1.0897	-0.546388	0.0904674	-2.18904	-1.17751	2.36118	0.129809	0.340063	0.517012	-2.5308	0.609511	-0.702692	0.51697	0.603829	0.30946	-0.939844	-0.602951	-0.948088	-0.385293	-1.20945	2.53983	-0.532318	-1.89184	-1.03114	0.115986	0.313566
SKMEL30 UNINDUCED	Human cell lines	-0.147387	1.32732	1.10148	1.97352	0.394333	0.217243	1.82078	-1.1369	1.45426	2.88781	-1.3507	-0.364371	-0.595121	1.00711	0.457576	-0.326743	0.278254	-0.171921	2.27729	-0.914376	-0.0511948	1.99441	-1.29083	-0.731876	-0.0751397	-2.29869	-1.2142	2.14237	0.0300185	0.1518	0.263264	-2.71614	0.520132	-0.854894	0.463526	0.362851	-0.149073	-0.957398	-0.752707	-1.24353	-0.709907	-1.48922	2.43893	-0.778921	-2.44248	-1.31815	-0.0303137	0.189215
SKMEL30 PPP2R3B OE 6h	Human cell lines	-0.0968037	1.37692	1.23353	2.00779	0.403791	0.256709	1.75543	-0.831463	1.4377	2.95383	-0.774061	-0.110818	-0.480011	1.24291	0.6362	-0.267877	0.291752	-0.0581964	2.29087	-0.824482	-0.0136876	2.05681	-1.14174	-0.566133	-0.0389497	-2.26143	-1.18014	2.24317	0.0662723	-0.0189185	0.478299	-2.57748	0.578726	-0.752234	0.488408	0.548008	0.158886	-0.924066	-0.682706	-1.05169	-0.540693	-1.33279	2.46395	-0.599561	-2.22418	-1.12832	0.0341898	0.212181
SKMEL30 PPP2R3B OE 16h	Human cell lines	-0.208783	1.34482	1.1661	1.92946	0.412928	0.138827	1.77368	-0.810972	1.44874	2.95229	-0.907864	-0.249359	-0.578596	1.14079	0.587227	-0.352065	0.239971	-0.153526	2.18263	-0.867954	-0.0527456	2.00293	-1.25928	-0.690143	-0.107839	-2.27174	-1.23052	2.19574	0.0183327	0.0774204	0.318483	-2.67913	0.513702	-0.896225	0.413318	0.484858	0.172853	-1.08256	-0.782863	-1.12342	-0.548305	-1.3744	2.32257	-0.682691	-2.36422	-1.18948	-0.0261884	0.111322
SKMEL30 UNINDUCED	Human cell lines	-0.139297	1.3606	1.1533	2.01789	0.428585	0.281829	1.84963	-0.823058	1.49552	2.85775	-1.19769	-0.253759	-0.486063	1.21218	1.0492	-0.264856	0.34515	-0.0906481	2.32764	-0.809322	0.00456401	2.06954	-1.1707	-0.582629	0.0334114	-2.19994	-1.15778	2.26071	0.126718	0.336061	0.492232	-2.56389	0.696849	-0.760566	0.505957	0.496433	0.100267	-0.864137	-0.663609	-1.02858	-0.522684	-1.38412	2.45169	-0.64174	-2.26172	-1.13914	0.0341253	0.236142
SKMEL30 PPP2R3B OE 6h	Human cell lines	0.0319104	1.48555	1.38035	2.24852	0.545008	0.445353	2.07249	-0.675274	1.58214	3.19899	-0.636818	0.00606846	-0.385181	1.33008	0.943342	-0.199936	0.425903	0.0687768	2.45815	-0.693354	-0.00960743	2.23294	-1.05121	-0.439192	0.148428	-2.09033	-1.10733	2.37373	0.220907	0.370605	0.673336	-2.46949	0.770477	-0.642762	0.552435	0.61941	0.278219	-0.803542	-0.535012	-0.840935	-0.377112	-1.11126	2.54623	-0.475633	-2.11777	-0.93126	0.279355	0.312965
SKMEL30 PPP2R3B OE 16h	Human cell lines	-0.200268	1.29497	1.0973	1.97274	0.388991	0.158184	1.70527	-0.850352	1.4094	2.95813	-1.0377	-0.284039	-0.579003	1.08045	0.684885	-0.420872	0.237317	-0.115113	2.25193	-0.888238	-0.0498802	2.01802	-1.27319	-0.636887	-0.0802057	-2.26913	-1.2397	2.22927	0.0397826	0.128045	0.318681	-2.70767	0.505317	-0.889532	0.399322	0.48913	0.136933	-1.09618	-0.757072	-1.13404	-0.576602	-1.47988	2.3462	-0.708804	-2.34063	-1.25524	-0.0420671	0.0904072
[truncated: 249 more columns]

## Sheet: SKMEL30 NormLinear
	Antibody Name	14-3-3-beta	14-3-3-zeta	4E-BP1	4E-BP1_pS65	53BP1	A-Raf	ACC1	ACC_pS79	ADAR1	Akt	Akt_pS473	Akt_pT308	AMPK-a2_pS345	AMPKa	AMPKa_pT172	Annexin-I	Annexin-VII	AR	ARID1A	Atg3	Atg7	ATM	ATM_pS1981	ATR_pS428	Aurora-B	Axl	b-Actin	b-Catenin	b-Catenin_pT41_S45	B-Raf	B-Raf_pS445	B7-H4	Bad_pS112	Bak	BAP1	Bax	Bcl-xL	Bcl2	Beclin	Bid	Bim	BiP-GRP78	BRD4	c-Abl	c-IAP2	c-Jun_pS73	c-Kit	c-Myc
	Antibody Origin	R	R	R	R	R	R	R	R	M	R	R	R	R	R	R	M	M	R	R	R	R	R	R	R	R	R	R	R	R	R	R	R	R	R	M	R	R	M	G	R	R	M	R	R	R	R	R	R
	Gene Name	YWHAB	YWHAZ	EIF4EBP1	EIF4EBP1	TP53BP1	ARAF	ACACA	ACACA	ADAR	AKT1	AKT1	AKT1	PRKAA2	PRKAA1	PRKAA1	ANXA1	ANXA7	AR	ARID1A	ATG3	ATG7	ATM	ATM	ATR	AIM1	AXL	ACTB	CTNNB1	CTNNB1	BRAF	BRAF	VTCN1	BAD	BAK1	BAP1	BAX	BCL2L1	BCL2	BECN1	BID	BCL2L11	HSPA5	BRD4	ABL1	BIRC3	JUN	KIT	MYC
	Validation Status	V	V	V	V	V	V	C	V	V	V	V	V	V	C	C	V	V	V	C	V	V	V	V	C	V	V	C	V	V	C	V	C	V	C	V	V	V	V	C	C	V	C	V	V	C	V	V	C
	Slide Id	GBL1106377	GBL1106378	GBL1106144	GBL1106145	GBL1106236	GBL1106289	GBL1106462	GBL1106146	GBL1106403	GBL1106257	GBL1106170	GBL1106276	GBL1106309	GBL1106148	GBL1106149	GBL1106406	GBL1106402	GBL1106217	GBL1106322	GBL1106329	GBL1106330	GBL1106311	GBL1106312	GBL1106353	GBL1106319	GBL1106301	GBL1106282	GBL1106153	GBL1106283	GBL1106366	GBL1106157	GBL1106348	GBL1106150	GBL1106453	GBL1106429	GBL1106152	GBL1106154	GBL1106484	GBL1106451	GBL1106155	GBL1106156	GBL1106477	GBL1106325	GBL1106324	GBL1106331	GBL1106163	GBL1106454	GBL1106380
	Antibody Name in Heatmap	14-3-3-beta-R-V	14-3-3-zeta-R-V	4E-BP1-R-V	4E-BP1_pS65-R-V	53BP1-R-V	A-Raf-R-V	ACC1-R-C	ACC_pS79-R-V	ADAR1-M-V	Akt-R-V	Akt_pS473-R-V	Akt_pT308-R-V	AMPK-a2_pS345-R-V	AMPKa-R-C	AMPKa_pT172-R-C	Annexin-I-M-V	Annexin-VII-M-V	AR-R-V	ARID1A-R-C	Atg3-R-V	Atg7-R-V	ATM-R-V	ATM_pS1981-R-V	ATR_pS428-R-C	Aurora-B-R-V	Axl-R-V	b-Actin-R-C	b-Catenin-R-V	b-Catenin_pT41_S45-R-V	B-Raf-R-C	B-Raf_pS445-R-V	B7-H4-R-C	Bad_pS112-R-V	Bak-R-C	BAP1-M-V	Bax-R-V	Bcl-xL-R-V	Bcl2-M-V	Beclin-G-C	Bid-R-C	Bim-R-V	BiP-GRP78-M-C	BRD4-R-V	c-Abl-R-V	c-IAP2-R-C	c-Jun_pS73-R-V	c-Kit-R-V	c-Myc-R-C
	Probabilities (QC Score)	0.96012	0.970998	0.970697	0.965747	0.962192	0.968739	0.936665	0.962107	0.9619	0.968376	0.950891	0.965286	0.92298	0.96823	0.966847	0.89762	0.931514	0.941264	0.965541	0.929535	0.956583	0.971676	0.921248	0.956265	0.953827	0.966569	0.904157	0.9633	0.956814	0.963691	0.965826	0.89481	0.967993	0.914888	0.928461	0.951794	0.937543	0.889365	0.928658	0.940865	0.940423	0.82534	0.961683	0.9129	0.911602	0.947257	0.915797	0.957234
	Slide no.	1	2	3	4	5	6	7	8	9	10	11	12	13	14	15	16	17	18	19	20	21	22	23	24	25	26	27	28	29	30	31	32	33	34	35	36	37	38	39	40	41	42	43	44	45	46	47	48
Sample description	Sample Type	14-3-3-beta-R-V	14-3-3-zeta-R-V	4E-BP1-R-V	4E-BP1_pS65-R-V	53BP1-R-V	A-Raf-R-V	ACC1-R-C	ACC_pS79-R-V	ADAR1-M-V	Akt-R-V	Akt_pS473-R-V	Akt_pT308-R-V	AMPK-a2_pS345-R-V	AMPKa-R-C	AMPKa_pT172-R-C	Annexin-I-M-V	Annexin-VII-M-V	AR-R-V	ARID1A-R-C	Atg3-R-V	Atg7-R-V	ATM-R-V	ATM_pS1981-R-V	ATR_pS428-R-C	Aurora-B-R-V	Axl-R-V	b-Actin-R-C	b-Catenin-R-V	b-Catenin_pT41_S45-R-V	B-Raf-R-C	B-Raf_pS445-R-V	B7-H4-R-C	Bad_pS112-R-V	Bak-R-C	BAP1-M-V	Bax-R-V	Bcl-xL-R-V	Bcl2-M-V	Beclin-G-C	Bid-R-C	Bim-R-V	BiP-GRP78-M-C	BRD4-R-V	c-Abl-R-V	c-IAP2-R-C	c-Jun_pS73-R-V	c-Kit-R-V	c-Myc-R-C
		NormLinear	NormLinear	NormLinear	NormLinear	NormLinear	NormLinear	NormLinear	NormLinear	NormLinear	NormLinear	NormLinear	NormLinear	NormLinear	NormLinear	NormLinear	NormLinear	NormLinear	NormLinear	NormLinear	NormLinear	NormLinear	NormLinear	NormLinear	NormLinear	NormLinear	NormLinear	NormLinear	NormLinear	NormLinear	NormLinear	NormLinear	NormLinear	NormLinear	NormLinear	NormLinear	NormLinear	NormLinear	NormLinear	NormLinear	NormLinear	NormLinear	NormLinear	NormLinear	NormLinear	NormLinear	NormLinear	NormLinear	NormLinear
SKMEL30 UNINDUCED	Human cell lines	0.998903	1.02731	0.960046	0.975631	1.00215	1.01649	1.03715	0.843675	0.989958	0.984254	1.03715	1.03715	0.986508	0.995732	0.915919	0.986362	1.04003	0.948207	0.972	1.00677	1.03715	0.962589	0.99721	0.94944	0.993824	1.00557	1.00759	0.93429	0.984341	1.03366	1.02135	1.03237	1.02365	1.0369	1.01633	1.00153	0.850399	1.02827	1.02007	0.96978	0.950794	0.958379	1.0425	0.954179	0.980612	0.962558	1.03715	1.03958
SKMEL30 PPP2R3B OE 6h	Human cell lines	0.957709	1.02077	0.912897	0.940853	0.99421	0.997879	1.02444	0.870643	0.993053	0.983572	1.17935	1.12638	0.990849	1.01235	0.943211	0.975906	1.01139	0.965165	1.00497	0.999437	1.05129	0.977794	0.986567	0.982465	0.992886	0.982365	0.984772	0.987336	0.995791	0.97536	1.03127	0.980078	0.958023	1.02269	1.00673	1.00251	0.863685	0.986589	1.04729	0.954165	0.940474	1	1.01082	0.967963	1.01871	0.962473	1.02866	0.963013
SKMEL30 PPP2R3B OE 16h	Human cell lines	1.00782	1.00249	1.03422	0.970993	1.02663	0.983121	1.01672	0.967422	0.974854	1.02724	1.22339	1.13347	1.00322	1.01009	0.919638	0.975084	0.982437	1.02016	0.942725	0.999553	0.968554	0.950765	1.0205	0.966069	1.0177	0.959125	0.930695	0.994203	0.965752	1.05097	1.04104	1.00558	0.965319	1.00828	0.941572	0.98241	1.02259	0.918437	1.00657	1.02458	1.01587	1.02411	0.964489	1.00701	1.23841	1.01258	1.00021	0.973385
SKMEL30 UNINDUCED	Human cell lines	1.02073	1.00842	0.984722	1.02073	1.01406	1.02073	1.05204	0.825972	1.02464	0.976115	0.688672	0.933468	1.00911	0.930398	0.901863	1.02073	1.01123	0.98132	1.02073	0.988411	1.0143	1.00417	0.998648	0.95569	1.02073	1.00003	1.02073	0.961066	1.01385	1.03768	0.982267	0.994881	1.02073	1.02073	1.02073	0.935186	0.837173	1.02073	1.02073	0.939193	0.912567	0.94901	1.01174	0.954869	0.951153	0.933633	1.01671	1.00461
SKMEL30 PPP2R3B OE 6h	Human cell lines	0.995231	0.982563	1.0159	0.984043	0.960941	0.987591	0.946551	0.960941	0.953615	0.961971	0.966903	1.04764	1.0289	1.03142	0.960941	1.00096	0.960941	0.999609	0.970027	0.990337	0.980041	0.98713	1.04251	1.00924	0.985351	0.966088	0.983892	0.970245	0.978748	0.867873	1.07336	1.0311	1.00077	1.03181	0.977658	1.00097	0.975675	0.983401	1.00872	1.00993	0.966025	0.995745	0.969142	1.01794	1.04172	1.00255	1.00092	0.960941
SKMEL30 PPP2R3B OE 16h	Human cell lines	0.968973	1.0111	1.02012	0.98069	1.01752	0.957609	1.00864	1.02556	1.0111	1.0111	0.927259	1.00139	1.0111	1.0111	0.977353	0.993507	0.975453	0.984533	0.946888	1.0111	1.00365	1.00058	1.0111	0.974456	0.98844	1.00928	0.99972	0.987873	0.996178	0.976235	1.01096	1.0111	1.0066	0.982543	0.976517	1.00811	1.03659	0.927081	0.990184	1.0111	1.0111	1.01794	0.924538	1.0111	0.994704	1.0111	1.01	0.942827
SKMEL30 UNINDUCED	Human cell lines	0.962964	0.968114	0.95758	0.987493	0.974179	1.00142	1.00689	0.963175	0.989141	0.896842	0.718351	0.945498	1.02101	1.00615	1.27498	0.999551	0.993687	0.973957	0.991589	0.997299	0.989047	0.992391	1.01821	0.994279	1.03241	1.00463	0.995767	0.978679	1.01706	1.1061	1.07999	1.03721	1.08236	1.02228	0.986162	0.962439	0.933549	1.02153	1.01858	1.02264	0.974737	0.95758	0.95758	0.985151	1.01141	0.991581	0.997373	0.973617
SKMEL30 PPP2R3B OE 6h	Human cell lines	0.989521	0.963416	1.02283	1.05739	0.963744	1.02357	1.07237	0.973798	0.958539	1.03685	0.967056	1.03312	0.999252	0.996398	1.08121	0.954166	0.959035	0.992676	0.990589	0.986305	0.893773	1.01426	1.00945	1.00222	1.02036	0.989181	0.941066	0.965914	0.990775	1.03388	1.11741	1.01055	1.03947	1.0123	0.929427	0.956466	0.96379	0.972224	1.01621	1.06289	0.983978	1.05582	0.933063	1.00875	1.01985	1.04516	1.07884	0.937109
SKMEL30 PPP2R3B OE 16h	Human cell lines	0.973398	0.975445	0.9713	1.0092	0.999434	0.969239	0.960636	0.996605	0.98258	1.01384	0.846317	0.976291	1.00946	0.968379	1.0444	0.945962	0.97235	1.00974	0.992143	0.995643	1.0043	1.00974	1.00005	1.00974	1.0062	1.00974	0.992044	1.00974	1.00974	1.00974	1.00974	0.989965	0.999423	0.985785	0.965789	1.00974	1.00974	0.917133	1.00669	1.00233	0.990128	0.94489	0.938541	0.991628	1.00974	0.964744	0.997598	0.928008
[truncated: 251 more columns]

## Sheet: SKMEL30 NormLog2
	Antibody Name	14-3-3-beta	14-3-3-zeta	4E-BP1	4E-BP1_pS65	53BP1	A-Raf	ACC1	ACC_pS79	ADAR1	Akt	Akt_pS473	Akt_pT308	AMPK-a2_pS345	AMPKa	AMPKa_pT172	Annexin-I	Annexin-VII	AR	ARID1A	Atg3	Atg7	ATM	ATM_pS1981	ATR_pS428	Aurora-B	Axl	b-Actin	b-Catenin	b-Catenin_pT41_S45	B-Raf	B-Raf_pS445	B7-H4	Bad_pS112	Bak	BAP1	Bax	Bcl-xL	Bcl2	Beclin	Bid	Bim	BiP-GRP78	BRD4	c-Abl	c-IAP2	c-Jun_pS73	c-Kit	c-Myc
	Antibody Origin	R	R	R	R	R	R	R	R	M	R	R	R	R	R	R	M	M	R	R	R	R	R	R	R	R	R	R	R	R	R	R	R	R	R	M	R	R	M	G	R	R	M	R	R	R	R	R	R
	Gene Name	YWHAB	YWHAZ	EIF4EBP1	EIF4EBP1	TP53BP1	ARAF	ACACA	ACACA	ADAR	AKT1	AKT1	AKT1	PRKAA2	PRKAA1	PRKAA1	ANXA1	ANXA7	AR	ARID1A	ATG3	ATG7	ATM	ATM	ATR	AIM1	AXL	ACTB	CTNNB1	CTNNB1	BRAF	BRAF	VTCN1	BAD	BAK1	BAP1	BAX	BCL2L1	BCL2	BECN1	BID	BCL2L11	HSPA5	BRD4	ABL1	BIRC3	JUN	KIT	MYC
	Validation Status	V	V	V	V	V	V	C	V	V	V	V	V	V	C	C	V	V	V	C	V	V	V	V	C	V	V	C	V	V	C	V	C	V	C	V	V	V	V	C	C	V	C	V	V	C	V	V	C
	Slide Id	GBL1106377	GBL1106378	GBL1106144	GBL1106145	GBL1106236	GBL1106289	GBL1106462	GBL1106146	GBL1106403	GBL1106257	GBL1106170	GBL1106276	GBL1106309	GBL1106148	GBL1106149	GBL1106406	GBL1106402	GBL1106217	GBL1106322	GBL1106329	GBL1106330	GBL1106311	GBL1106312	GBL1106353	GBL1106319	GBL1106301	GBL1106282	GBL1106153	GBL1106283	GBL1106366	GBL1106157	GBL1106348	GBL1106150	GBL1106453	GBL1106429	GBL1106152	GBL1106154	GBL1106484	GBL1106451	GBL1106155	GBL1106156	GBL1106477	GBL1106325	GBL1106324	GBL1106331	GBL1106163	GBL1106454	GBL1106380
	Antibody Name in Heatmap	14-3-3-beta-R-V	14-3-3-zeta-R-V	4E-BP1-R-V	4E-BP1_pS65-R-V	53BP1-R-V	A-Raf-R-V	ACC1-R-C	ACC_pS79-R-V	ADAR1-M-V	Akt-R-V	Akt_pS473-R-V	Akt_pT308-R-V	AMPK-a2_pS345-R-V	AMPKa-R-C	AMPKa_pT172-R-C	Annexin-I-M-V	Annexin-VII-M-V	AR-R-V	ARID1A-R-C	Atg3-R-V	Atg7-R-V	ATM-R-V	ATM_pS1981-R-V	ATR_pS428-R-C	Aurora-B-R-V	Axl-R-V	b-Actin-R-C	b-Catenin-R-V	b-Catenin_pT41_S45-R-V	B-Raf-R-C	B-Raf_pS445-R-V	B7-H4-R-C	Bad_pS112-R-V	Bak-R-C	BAP1-M-V	Bax-R-V	Bcl-xL-R-V	Bcl2-M-V	Beclin-G-C	Bid-R-C	Bim-R-V	BiP-GRP78-M-C	BRD4-R-V	c-Abl-R-V	c-IAP2-R-C	c-Jun_pS73-R-V	c-Kit-R-V	c-Myc-R-C
	Probabilities (QC Score)	0.96012	0.970998	0.970697	0.965747	0.962192	0.968739	0.936665	0.962107	0.9619	0.968376	0.950891	0.965286	0.92298	0.96823	0.966847	0.89762	0.931514	0.941264	0.965541	0.929535	0.956583	0.971676	0.921248	0.956265	0.953827	0.966569	0.904157	0.9633	0.956814	0.963691	0.965826	0.89481	0.967993	0.914888	0.928461	0.951794	0.937543	0.889365	0.928658	0.940865	0.940423	0.82534	0.961683	0.9129	0.911602	0.947257	0.915797	0.957234
	Slide no.	1	2	3	4	5	6	7	8	9	10	11	12	13	14	15	16	17	18	19	20	21	22	23	24	25	26	27	28	29	30	31	32	33	34	35	36	37	38	39	40	41	42	43	44	45	46	47	48
Sample description	Sample Type	14-3-3-beta-R-V	14-3-3-zeta-R-V	4E-BP1-R-V	4E-BP1_pS65-R-V	53BP1-R-V	A-Raf-R-V	ACC1-R-C	ACC_pS79-R-V	ADAR1-M-V	Akt-R-V	Akt_pS473-R-V	Akt_pT308-R-V	AMPK-a2_pS345-R-V	AMPKa-R-C	AMPKa_pT172-R-C	Annexin-I-M-V	Annexin-VII-M-V	AR-R-V	ARID1A-R-C	Atg3-R-V	Atg7-R-V	ATM-R-V	ATM_pS1981-R-V	ATR_pS428-R-C	Aurora-B-R-V	Axl-R-V	b-Actin-R-C	b-Catenin-R-V	b-Catenin_pT41_S45-R-V	B-Raf-R-C	B-Raf_pS445-R-V	B7-H4-R-C	Bad_pS112-R-V	Bak-R-C	BAP1-M-V	Bax-R-V	Bcl-xL-R-V	Bcl2-M-V	Beclin-G-C	Bid-R-C	Bim-R-V	BiP-GRP78-M-C	BRD4-R-V	c-Abl-R-V	c-IAP2-R-C	c-Jun_pS73-R-V	c-Kit-R-V	c-Myc-R-C
		NormLog2	NormLog2	NormLog2	NormLog2	NormLog2	NormLog2	NormLog2	NormLog2	NormLog2	NormLog2	NormLog2	NormLog2	NormLog2	NormLog2	NormLog2	NormLog2	NormLog2	NormLog2	NormLog2	NormLog2	NormLog2	NormLog2	NormLog2	NormLog2	NormLog2	NormLog2	NormLog2	NormLog2	NormLog2	NormLog2	NormLog2	NormLog2	NormLog2	NormLog2	NormLog2	NormLog2	NormLog2	NormLog2	NormLog2	NormLog2	NormLog2	NormLog2	NormLog2	NormLog2	NormLog2	NormLog2	NormLog2	NormLog2
SKMEL30 UNINDUCED	Human cell lines	-0.00158389	0.0388732	-0.0588246	-0.0355927	0.00310235	0.0235975	0.0526179	-0.24524	-0.0145609	-0.0228978	0.0526179	0.0526179	-0.0195977	-0.00617087	-0.126708	-0.0198111	0.0566251	-0.0767257	-0.0409712	0.0097377	0.0526179	-0.0550077	-0.00403093	-0.074852	-0.00893752	0.00800803	0.0109083	-0.098057	-0.0227704	0.0477678	0.0304706	0.0459626	0.0337286	0.0522712	0.0233749	0.00220649	-0.233788	0.0402207	0.0286637	-0.0442711	-0.0727951	-0.0613323	0.0600475	-0.0676679	-0.0282454	-0.055055	0.0526179	0.0559981
SKMEL30 PPP2R3B OE 6h	Human cell lines	-0.0623408	0.0296592	-0.131476	-0.0879595	-0.00837705	-0.00306339	0.0348413	-0.199846	-0.0100573	-0.0238979	0.23799	0.17169	-0.0132635	0.0177079	-0.0843477	-0.0351859	0.0163388	-0.0511529	0.00715275	-0.000812403	0.0721588	-0.0323982	-0.0195106	-0.0255226	-0.0103	-0.0256688	-0.022138	-0.0183863	-0.00608542	-0.0359929	0.0444176	-0.0290318	-0.0618673	0.03237	0.00966991	0.00361497	-0.211423	-0.019479	0.0666585	-0.0676899	-0.08854	0	0.0155332	-0.0469768	0.0267388	-0.0551819	0.0407603	-0.0543727
SKMEL30 PPP2R3B OE 16h	Human cell lines	0.0112341	0.00358932	0.0485452	-0.042467	0.0379093	-0.0245585	0.023921	-0.0477823	-0.0367415	0.0387765	0.29088	0.180747	0.0046388	0.0144887	-0.120862	-0.0364016	-0.0255638	0.0287911	-0.085091	-0.000645578	-0.046096	-0.0728396	0.0292692	-0.0498025	0.0253054	-0.0602087	-0.10362	-0.00838727	-0.0502748	0.0717156	0.0580285	0.00802649	-0.0509227	0.0118999	-0.0868572	-0.0256029	0.032225	-0.122748	0.00945388	0.0350299	0.0227099	0.0343669	-0.0521635	0.0100716	0.308493	0.0180357	0.000299239	-0.038917
SKMEL30 UNINDUCED	Human cell lines	0.0296038	0.0121006	-0.0222111	0.0296038	0.0201457	0.0296038	0.0731868	-0.275835	0.0351239	-0.0348763	-0.538111	-0.0993278	0.0130788	-0.10408	-0.14902	0.0296038	0.0161058	-0.0272049	0.0296038	-0.0168177	0.020491	0.00599772	-0.00195191	-0.0653852	0.0296038	4.87897e-05	0.0296038	-0.0572927	0.0198397	0.0533582	-0.0258135	-0.00740485	0.0296038	0.0296038	0.0296038	-0.0966755	-0.256403	0.0296038	0.0296038	-0.0905061	-0.131998	-0.0755046	0.0168416	-0.0666257	-0.0722504	-0.0990724	0.0239047	0.00663762
SKMEL30 PPP2R3B OE 6h	Human cell lines	-0.00689691	-0.0253777	0.0227519	-0.0232072	-0.0574799	-0.0180142	-0.0792482	-0.0574799	-0.0685206	-0.0559347	-0.0485572	0.0671419	0.0411046	0.0446318	-0.0574799	0.0013857	-0.0574799	-0.000563746	-0.0439025	-0.0140081	-0.0290854	-0.018688	0.0600576	0.0132738	-0.0212899	-0.0497728	-0.0234277	-0.0435796	-0.0309902	-0.204444	0.102138	0.0441775	0.00111408	0.0451797	-0.0325977	0.00139832	-0.0355275	-0.0241486	0.0125208	0.014249	-0.0498679	-0.00615243	-0.0452205	0.0256506	0.0589703	0.00367294	0.00132439	-0.0574799
SKMEL30 PPP2R3B OE 16h	Human cell lines	-0.0454718	0.0159248	0.0287324	-0.0281314	0.0250615	-0.0624912	0.0124114	0.0364162	0.0159248	0.0159248	-0.108955	0.00200489	0.0159248	0.0159248	-0.0330478	-0.00939762	-0.0358562	-0.0224884	-0.0787345	0.0159248	0.00526127	0.000833693	0.0159248	-0.0373311	-0.0167743	0.0133241	-0.000403651	-0.0176027	-0.00552514	-0.0347002	0.015726	0.0159248	0.00949472	-0.025407	-0.0342826	0.0116522	0.051845	-0.109232	-0.0142313	0.0159248	0.0159248	0.025646	-0.113196	0.0159248	-0.00766063	0.0159248	0.0143509	-0.0849349
SKMEL30 UNINDUCED	Human cell lines	-0.0544455	-0.0467516	-0.062535	-0.0181574	-0.0377418	0.00205051	0.0098999	-0.0541294	-0.0157517	-0.157075	-0.477238	-0.0808543	0.0299984	0.00885118	0.350469	-0.00064826	-0.0091369	-0.0380705	-0.0121864	-0.00390258	-0.0158889	-0.0110196	0.0260416	-0.00827764	0.0460161	0.00665742	-0.00612013	-0.0310927	0.0244003	0.14548	0.111015	0.0527044	0.114182	0.0317928	-0.0201041	-0.0552326	-0.0992016	0.0307255	0.0265627	0.0323031	-0.0369147	-0.062535	-0.062535	-0.0215832	0.0163747	-0.0121973	-0.00379524	-0.0385742
SKMEL30 PPP2R3B OE 6h	Human cell lines	-0.0151976	-0.0537698	0.0325596	0.0805052	-0.0532778	0.0336148	0.100799	-0.0383051	-0.0610916	0.0522102	-0.0483284	0.047013	-0.00107999	-0.00520643	0.112647	-0.067688	-0.0603442	-0.0106054	-0.013641	-0.0198949	-0.16202	0.0204265	0.0135752	0.00320034	0.0290731	-0.0156941	-0.0876328	-0.0500327	-0.0133701	0.0480645	0.16016	0.0151471	0.0558495	0.0176372	-0.105586	-0.0642151	-0.0532086	-0.0406391	0.0231997	0.0879899	-0.0233023	0.078365	-0.0999541	0.0125637	0.0283632	0.0637204	0.109475	-0.093711
SKMEL30 PPP2R3B OE 16h	Human cell lines	-0.0388981	-0.0358681	-0.0420107	0.0132065	-0.000816985	-0.0450763	-0.0579389	-0.00490559	-0.0253539	0.0198302	-0.240731	-0.0346165	0.0135769	-0.0463566	0.0626685	-0.0801452	-0.0404518	0.0139834	-0.0113805	-0.0062998	0.00618529	0.0139834	6.78191e-05	0.0139834	0.00891742	0.0139834	-0.0115242	0.0139834	0.0139834	0.0139834	0.0139834	-0.0145506	-0.000832287	-0.0206551	-0.0502207	0.0139834	0.0139834	-0.124797	0.00961863	0.00336126	-0.0143135	-0.0817811	-0.091509	-0.0121296	0.0139834	-0.051782	-0.00346913	-0.107791
[truncated: 249 more columns]

## Sheet: SKMEL30 NormLog2_MedianCentered
	Antibody Name	14-3-3-beta	14-3-3-zeta	4E-BP1	4E-BP1_pS65	53BP1	A-Raf	ACC1	ACC_pS79	ADAR1	Akt	Akt_pS473	Akt_pT308	AMPK-a2_pS345	AMPKa	AMPKa_pT172	Annexin-I	Annexin-VII	AR	ARID1A	Atg3	Atg7	ATM	ATM_pS1981	ATR_pS428	Aurora-B	Axl	b-Actin	b-Catenin	b-Catenin_pT41_S45	B-Raf	B-Raf_pS445	B7-H4	Bad_pS112	Bak	BAP1	Bax	Bcl-xL	Bcl2	Beclin	Bid	Bim	BiP-GRP78	BRD4	c-Abl	c-IAP2	c-Jun_pS73	c-Kit	c-Myc
	Antibody Origin	R	R	R	R	R	R	R	R	M	R	R	R	R	R	R	M	M	R	R	R	R	R	R	R	R	R	R	R	R	R	R	R	R	R	M	R	R	M	G	R	R	M	R	R	R	R	R	R
	Gene Name	YWHAB	YWHAZ	EIF4EBP1	EIF4EBP1	TP53BP1	ARAF	ACACA	ACACA	ADAR	AKT1	AKT1	AKT1	PRKAA2	PRKAA1	PRKAA1	ANXA1	ANXA7	AR	ARID1A	ATG3	ATG7	ATM	ATM	ATR	AIM1	AXL	ACTB	CTNNB1	CTNNB1	BRAF	BRAF	VTCN1	BAD	BAK1	BAP1	BAX	BCL2L1	BCL2	BECN1	BID	BCL2L11	HSPA5	BRD4	ABL1	BIRC3	JUN	KIT	MYC
	Validation Status	V	V	V	V	V	V	C	V	V	V	V	V	V	C	C	V	V	V	C	V	V	V	V	C	V	V	C	V	V	C	V	C	V	C	V	V	V	V	C	C	V	C	V	V	C	V	V	C
	Slide Id	GBL1106377	GBL1106378	GBL1106144	GBL1106145	GBL1106236	GBL1106289	GBL1106462	GBL1106146	GBL1106403	GBL1106257	GBL1106170	GBL1106276	GBL1106309	GBL1106148	GBL1106149	GBL1106406	GBL1106402	GBL1106217	GBL1106322	GBL1106329	GBL1106330	GBL1106311	GBL1106312	GBL1106353	GBL1106319	GBL1106301	GBL1106282	GBL1106153	GBL1106283	GBL1106366	GBL1106157	GBL1106348	GBL1106150	GBL1106453	GBL1106429	GBL1106152	GBL1106154	GBL1106484	GBL1106451	GBL1106155	GBL1106156	GBL1106477	GBL1106325	GBL1106324	GBL1106331	GBL1106163	GBL1106454	GBL1106380
	Antibody Name in Heatmap	14-3-3-beta-R-V	14-3-3-zeta-R-V	4E-BP1-R-V	4E-BP1_pS65-R-V	53BP1-R-V	A-Raf-R-V	ACC1-R-C	ACC_pS79-R-V	ADAR1-M-V	Akt-R-V	Akt_pS473-R-V	Akt_pT308-R-V	AMPK-a2_pS345-R-V	AMPKa-R-C	AMPKa_pT172-R-C	Annexin-I-M-V	Annexin-VII-M-V	AR-R-V	ARID1A-R-C	Atg3-R-V	Atg7-R-V	ATM-R-V	ATM_pS1981-R-V	ATR_pS428-R-C	Aurora-B-R-V	Axl-R-V	b-Actin-R-C	b-Catenin-R-V	b-Catenin_pT41_S45-R-V	B-Raf-R-C	B-Raf_pS445-R-V	B7-H4-R-C	Bad_pS112-R-V	Bak-R-C	BAP1-M-V	Bax-R-V	Bcl-xL-R-V	Bcl2-M-V	Beclin-G-C	Bid-R-C	Bim-R-V	BiP-GRP78-M-C	BRD4-R-V	c-Abl-R-V	c-IAP2-R-C	c-Jun_pS73-R-V	c-Kit-R-V	c-Myc-R-C
	Probabilities (QC Score)	0.96012	0.970998	0.970697	0.965747	0.962192	0.968739	0.936665	0.962107	0.9619	0.968376	0.950891	0.965286	0.92298	0.96823	0.966847	0.89762	0.931514	0.941264	0.965541	0.929535	0.956583	0.971676	0.921248	0.956265	0.953827	0.966569	0.904157	0.9633	0.956814	0.963691	0.965826	0.89481	0.967993	0.914888	0.928461	0.951794	0.937543	0.889365	0.928658	0.940865	0.940423	0.82534	0.961683	0.9129	0.911602	0.947257	0.915797	0.957234
	Slide no.	1	2	3	4	5	6	7	8	9	10	11	12	13	14	15	16	17	18	19	20	21	22	23	24	25	26	27	28	29	30	31	32	33	34	35	36	37	38	39	40	41	42	43	44	45	46	47	48
Sample description	Sample Type	14-3-3-beta-R-V	14-3-3-zeta-R-V	4E-BP1-R-V	4E-BP1_pS65-R-V	53BP1-R-V	A-Raf-R-V	ACC1-R-C	ACC_pS79-R-V	ADAR1-M-V	Akt-R-V	Akt_pS473-R-V	Akt_pT308-R-V	AMPK-a2_pS345-R-V	AMPKa-R-C	AMPKa_pT172-R-C	Annexin-I-M-V	Annexin-VII-M-V	AR-R-V	ARID1A-R-C	Atg3-R-V	Atg7-R-V	ATM-R-V	ATM_pS1981-R-V	ATR_pS428-R-C	Aurora-B-R-V	Axl-R-V	b-Actin-R-C	b-Catenin-R-V	b-Catenin_pT41_S45-R-V	B-Raf-R-C	B-Raf_pS445-R-V	B7-H4-R-C	Bad_pS112-R-V	Bak-R-C	BAP1-M-V	Bax-R-V	Bcl-xL-R-V	Bcl2-M-V	Beclin-G-C	Bid-R-C	Bim-R-V	BiP-GRP78-M-C	BRD4-R-V	c-Abl-R-V	c-IAP2-R-C	c-Jun_pS73-R-V	c-Kit-R-V	c-Myc-R-C
		Median-Centered	Median-Centered	Median-Centered	Median-Centered	Median-Centered	Median-Centered	Median-Centered	Median-Centered	Median-Centered	Median-Centered	Median-Centered	Median-Centered	Median-Centered	Median-Centered	Median-Centered	Median-Centered	Median-Centered	Median-Centered	Median-Centered	Median-Centered	Median-Centered	Median-Centered	Median-Centered	Median-Centered	Median-Centered	Median-Centered	Median-Centered	Median-Centered	Median-Centered	Median-Centered	Median-Centered	Median-Centered	Median-Centered	Median-Centered	Median-Centered	Median-Centered	Median-Centered	Median-Centered	Median-Centered	Median-Centered	Median-Centered	Median-Centered	Median-Centered	Median-Centered	Median-Centered	Median-Centered	Median-Centered	Median-Centered
SKMEL30 UNINDUCED	Human cell lines	0.0136137	0.0352839	-0.0366135	-0.0123854	0.00391933	0.0266609	0.0286969	-0.191111	0.00119079	0	0.101175	0.00560483	-0.0326764	-0.015022	-0.069228	0	0.0821889	-0.0542373	-0.0273302	0.0136403	0.0473566	-0.0439881	-0.0176061	-0.0493294	-0.0178549	0.00795924	0.0224325	-0.0669643	-0.016685	0	-0.013947	0.0308155	0.0242338	0.0226674	0.0559726	0.000808171	-0.18058	0.0643693	0.00546405	-0.0585201	-0.0358804	-0.0551799	0.112211	-0.0555383	-0.0446201	-0.0428577	0.038267	0.110371
SKMEL30 PPP2R3B OE 6h	Human cell lines	-0.0471432	0.0260698	-0.109264	-0.0647523	-0.00756006	0	0.0109203	-0.145717	0.00569439	-0.00100009	0.286547	0.124677	-0.0263423	0.00885673	-0.0268677	-0.0153747	0.0419026	-0.0286645	0.0207938	0.00309017	0.0668975	-0.0213786	-0.0330858	0	-0.0192174	-0.0257176	-0.0106138	0.0127064	0	-0.0837607	0	-0.0441789	-0.0713621	0.00276613	0.0422676	0.00221664	-0.158215	0.00466958	0.0434588	-0.0819389	-0.0516253	0.00615243	0.0676967	-0.0348473	0.010364	-0.0429847	0.0264094	0
SKMEL30 PPP2R3B OE 16h	Human cell lines	0.0264318	0	0.0707563	-0.0192597	0.0387263	-0.0214951	0	0.00634709	-0.0209898	0.0616742	0.339438	0.133734	-0.00843996	0.00563753	-0.0633816	-0.0165905	0	0.0512795	-0.07145	0.003257	-0.0513573	-0.0618201	0.015694	-0.0242799	0.016388	-0.0602575	-0.0920956	0.0227054	-0.0441894	0.0239478	0.0136109	-0.00712065	-0.0604175	-0.017704	-0.0542595	-0.0270012	0.0854336	-0.0985994	-0.0137458	0.0207809	0.0596247	0.0405193	0	0.0222012	0.292118	0.030233	-0.0140517	0.0154557
SKMEL30 UNINDUCED	Human cell lines	0.0448015	0.00851131	0	0.0528111	0.0209627	0.0326672	0.0492658	-0.221706	0.0508756	-0.0119785	-0.489554	-0.146341	0	-0.112931	-0.0915399	0.049415	0.0416696	-0.00471656	0.0432449	-0.0129151	0.0152298	0.0170173	-0.0155271	-0.0398627	0.0206864	0	0.041128	-0.0262	0.0259252	0.0055904	-0.0702311	-0.022552	0.0201091	0	0.0622015	-0.0980738	-0.203194	0.0537524	0.00640415	-0.104755	-0.0950835	-0.0693522	0.0690051	-0.0544961	-0.0886251	-0.0868751	0.00955376	0.0610103
SKMEL30 PPP2R3B OE 6h	Human cell lines	0.00830073	-0.028967	0.044963	0	-0.0566629	-0.0149508	-0.103169	-0.0033505	-0.052769	-0.0330369	0	0.0201288	0.0280259	0.0357806	0	0.0211968	-0.0319161	0.0219246	-0.0302615	-0.0101055	-0.0343467	-0.00766843	0.0464824	0.0387963	-0.0302074	-0.0498216	-0.0119035	-0.0124869	-0.0249048	-0.252212	0.0577199	0.0290304	-0.00838064	0.0155759	0	0	0.0176811	0	-0.0106789	0	-0.0129532	0	0.00694306	0.0377801	0.0425955	0.0158702	-0.0130265	-0.00310725
SKMEL30 PPP2R3B OE 16h	Human cell lines	-0.0302742	0.0123355	0.0509435	-0.00492413	0.0258785	-0.0594278	-0.0115096	0.0905457	0.0316765	0.0388226	-0.0603983	-0.0450081	0.00284606	0.00707365	0.0244321	0.0104135	-0.0102924	0	-0.0650935	0.0198274	0	0.0118532	0.00234963	-0.0118086	-0.0256917	0.0132754	0.0111206	0.01349	0.000560282	-0.082468	-0.0286916	0.000777689	0	-0.0550108	-0.00168493	0.0102539	0.105054	-0.0850838	-0.037431	0.00167582	0.0528396	0.0317984	-0.0610325	0.0280544	-0.0240354	0.0281221	0	-0.0305622
SKMEL30 UNINDUCED	Human cell lines	-0.0392479	-0.0503409	-0.0403239	0.00504988	-0.0369248	0.0051139	-0.014021	0	0	-0.134177	-0.428681	-0.127867	0.0169196	0	0.407949	0.0191629	0.0164269	-0.0155821	0.00145463	0	-0.0211502	0	0.0124664	0.0172449	0.0370987	0.00660863	0.00540409	0	0.0304857	0.0977125	0.0665976	0.0375573	0.104687	0.002189	0.0124936	-0.056631	-0.045993	0.0548741	0.00336298	0.0180541	0	-0.0563826	-0.0103715	-0.00945359	0	0	-0.0181461	0.0157984
SKMEL30 PPP2R3B OE 6h	Human cell lines	0	-0.0573591	0.0547707	0.103712	-0.0524608	0.0366782	0.0768782	0.0158244	-0.04534	0.0751079	0.000228794	0	-0.0141588	-0.0140576	0.170127	-0.0478768	-0.0347804	0.011883	0	-0.0159923	-0.167281	0.0314461	0	0.0287229	0.0201557	-0.0157428	-0.0761086	-0.01894	-0.00728464	0.000296677	0.115742	0	0.0463548	-0.0119666	-0.0729881	-0.0656134	0	-0.0164905	0	0.0737409	0.0136124	0.0845175	-0.0477906	0.0246933	0.0119884	0.0759177	0.0951238	-0.0393383
SKMEL30 PPP2R3B OE 16h	Human cell lines	-0.0237004	-0.0394574	-0.0197996	0.0364138	0	-0.0420129	-0.0818598	0.0492238	-0.00960226	0.042728	-0.192173	-0.0816295	0.000498144	-0.0552078	0.120148	-0.0603341	-0.014888	0.0364718	0.0022605	-0.00239723	0.000924025	0.025003	-0.0135074	0.039506	0	0.0139346	0	0.0450761	0.0200689	-0.0337844	-0.0304342	-0.0296978	-0.010327	-0.0502589	-0.0176231	0.0125851	0.067192	-0.100649	-0.013581	-0.0108878	0.0226012	-0.0756287	-0.0393455	0	-0.00239131	-0.0395847	-0.01782	-0.0534181
[truncated: 249 more columns]
