# Supplementary material for: Inherited duplications of PPP2R3B predispose to nevi and melanoma via a C21orf91-driven proliferative phenotype
Source: Genet Med. 2021 Jun 18;23(9):1636–47. doi: 10.1038/s41436-021-01204-y (PMC8460442; doi:10.1038/s41436-021-01204-y)
Supplement: Supplementary file 5 — Supplementary table 5 [file 41436_2021_1204_MOESM5_ESM.xlsx]

## Sheet: Lane-Merged_DiffExpGenes
Comparison	Gene	ENS.IDS	GENE.SYMBOLS	L2fc	p-adj
SKMEL30_0vs6	ENSG00000275719	ENSG00000275719	CTB-147N14.6	6.43	0.031
SKMEL30_0vs18	ENSG00000275719	ENSG00000275719	CTB-147N14.6	6.33	0.016
SKMEL30_0vs18	ENSG00000226007	ENSG00000226007	RP11-211N8.2	5.17	0.048
SKMEL30_0vs18	ENSG00000167393	ENSG00000167393	PPP2R3B	4.87	0
SKMEL30_0vs6	ENSG00000167393	ENSG00000167393	PPP2R3B	4.68	0
SKMEL2_0vs18	ENSG00000167393	ENSG00000167393	PPP2R3B	4.52	0
SKMEL2_0vs6	ENSG00000167393	ENSG00000167393	PPP2R3B	4.37	0
SKMEL30_0vs18	ENSG00000182168	ENSG00000182168	UNC5C	1.53	0
SKMEL30_0vs6	ENSG00000182168	ENSG00000182168	UNC5C	1.33	0
SKMEL2_0vs18	ENSG00000154642	ENSG00000154642	C21orf91	1.3	0
SKMEL30_0vs18	ENSG00000154642	ENSG00000154642	C21orf91	1.15	0
SKMEL2_0vs6	ENSG00000154642	ENSG00000154642	C21orf91	1.14	0
SKMEL30_0vs6	ENSG00000154642	ENSG00000154642	C21orf91	1.11	0
SKMEL30_0vs18	ENSG00000075213	ENSG00000075213	SEMA3A	0.88	0
SKMEL30_0vs18	ENSG00000186472	ENSG00000186472	PCLO	0.74	0.017
SKMEL2_0vs18	ENSG00000114120	ENSG00000114120	SLC25A36	0.61	0
SKMEL30_0vs6	ENSG00000114120	ENSG00000114120	SLC25A36	0.58	0
SKMEL2_0vs6	ENSG00000114120	ENSG00000114120	SLC25A36	0.57	0
SKMEL30_0vs18	ENSG00000044524	ENSG00000044524	EPHA3	0.54	0
SKMEL30_0vs18	ENSG00000114120	ENSG00000114120	SLC25A36	0.51	0
SKMEL2_0vs18	ENSG00000185567	ENSG00000185567	AHNAK2	0.49	0
SKMEL2_0vs18	ENSG00000140450	ENSG00000140450	ARRDC4	0.47	0.019
SKMEL2_0vs18	ENSG00000177576	ENSG00000177576	C18orf32	0.47	0.044
SKMEL2_0vs18	ENSG00000044524	ENSG00000044524	EPHA3	0.46	0.005
SKMEL2_0vs6	ENSG00000113369	ENSG00000113369	ARRDC3	0.44	0.01
SKMEL2_0vs18	ENSG00000013364	ENSG00000013364	MVP	0.4	0.01
SKMEL30_0vs18	ENSG00000150991	ENSG00000150991	UBC	0.4	0
SKMEL30_0vs18	ENSG00000128342	ENSG00000128342	LIF	0.38	0
SKMEL2_0vs6	ENSG00000150991	ENSG00000150991	UBC	0.37	0
SKMEL30_0vs18	ENSG00000248527	ENSG00000248527	MTATP6P1	0.37	0.008
SKMEL2_0vs6	ENSG00000168916	ENSG00000168916	ZNF608	0.36	0
SKMEL30_0vs6	ENSG00000150991	ENSG00000150991	UBC	0.36	0.001
SKMEL2_0vs18	ENSG00000123384	ENSG00000123384	LRP1	0.35	0.019
SKMEL2_0vs18	ENSG00000150991	ENSG00000150991	UBC	0.34	0.001
SKMEL2_0vs18	ENSG00000225190	ENSG00000225190	PLEKHM1	0.34	0.009
SKMEL30_0vs6	ENSG00000044524	ENSG00000044524	EPHA3	0.34	0.037
SKMEL2_0vs18	ENSG00000104419	ENSG00000104419	NDRG1	0.31	0.046
SKMEL2_0vs6	ENSG00000113328	ENSG00000113328	CCNG1	0.28	0
SKMEL2_0vs18	ENSG00000069974	ENSG00000069974	RAB27A	0.28	0.027
SKMEL2_0vs18	ENSG00000111412	ENSG00000111412	C12orf49	0.27	0
SKMEL2_0vs18	ENSG00000167716	ENSG00000167716	WDR81	0.27	0.006
SKMEL2_0vs18	ENSG00000136167	ENSG00000136167	LCP1	0.25	0.01
SKMEL2_0vs18	ENSG00000168916	ENSG00000168916	ZNF608	0.25	0.018
SKMEL2_0vs18	ENSG00000026751	ENSG00000026751	SLAMF7	0.24	0.012
SKMEL2_0vs18	ENSG00000102575	ENSG00000102575	ACP5	0.24	0.029
SKMEL2_0vs18	ENSG00000113328	ENSG00000113328	CCNG1	0.24	0
SKMEL2_0vs18	ENSG00000133313	ENSG00000133313	CNDP2	0.24	0.001
SKMEL2_0vs18	ENSG00000167291	ENSG00000167291	TBC1D16	0.24	0.026
SKMEL2_0vs18	ENSG00000130821	ENSG00000130821	SLC6A8	0.23	0.022
SKMEL2_0vs18	ENSG00000198053	ENSG00000198053	SIRPA	0.23	0
SKMEL2_0vs18	ENSG00000110911	ENSG00000110911	SLC11A2	0.22	0.002
SKMEL30_0vs18	ENSG00000013588	ENSG00000013588	GPRC5A	0.22	0.023
SKMEL2_0vs18	ENSG00000111674	ENSG00000111674	ENO2	0.21	0.011
SKMEL2_0vs18	ENSG00000145860	ENSG00000145860	RNF145	0.21	0.035
SKMEL2_0vs18	ENSG00000169021	ENSG00000169021	UQCRFS1	0.21	0.007
SKMEL30_0vs18	ENSG00000198053	ENSG00000198053	SIRPA	0.19	0.016
SKMEL2_0vs18	ENSG00000196208	ENSG00000196208	GREB1	0.18	0.048
SKMEL2_0vs18	ENSG00000111540	ENSG00000111540	RAB5B	0.16	0.046
SKMEL2_0vs18	ENSG00000143061	ENSG00000143061	IGSF3	0.15	0
SKMEL2_0vs18	ENSG00000183255	ENSG00000183255	PTTG1IP	0.13	0.033
SKMEL2_0vs18	ENSG00000132405	ENSG00000132405	TBC1D14	0.12	0.047
SKMEL2_0vs18	ENSG00000132780	ENSG00000132780	NASP	-0.12	0.023
SKMEL2_0vs18	ENSG00000110092	ENSG00000110092	CCND1	-0.13	0.033
SKMEL2_0vs18	ENSG00000166197	ENSG00000166197	NOLC1	-0.14	0.046
SKMEL2_0vs18	ENSG00000009954	ENSG00000009954	BAZ1B	-0.15	0.007
SKMEL2_0vs18	ENSG00000155827	ENSG00000155827	RNF20	-0.15	0.04
SKMEL2_0vs18	ENSG00000080824	ENSG00000080824	HSP90AA1	-0.16	0.012
SKMEL2_0vs18	ENSG00000170017	ENSG00000170017	ALCAM	-0.17	0.029
SKMEL30_0vs18	ENSG00000164175	ENSG00000164175	SLC45A2	-0.17	0.001
SKMEL2_0vs18	ENSG00000100234	ENSG00000100234	TIMP3	-0.18	0.019
SKMEL2_0vs18	ENSG00000109971	ENSG00000109971	HSPA8	-0.18	0.046
SKMEL2_0vs18	ENSG00000135919	ENSG00000135919	SERPINE2	-0.18	0.007
SKMEL2_0vs18	ENSG00000177119	ENSG00000177119	ANO6	-0.18	0.014
SKMEL2_0vs18	ENSG00000119326	ENSG00000119326	CTNNAL1	-0.19	0.007
SKMEL2_0vs18	ENSG00000006576	ENSG00000006576	PHTF2	-0.2	0.03
SKMEL2_0vs18	ENSG00000150867	ENSG00000150867	PIP4K2A	-0.2	0.012
SKMEL2_0vs18	ENSG00000171867	ENSG00000171867	PRNP	-0.2	0
SKMEL2_0vs18	ENSG00000196083	ENSG00000196083	IL1RAP	-0.2	0.019
SKMEL30_0vs18	ENSG00000110092	ENSG00000110092	CCND1	-0.2	0
SKMEL2_0vs6	ENSG00000206560	ENSG00000206560	ANKRD28	-0.21	0.019
SKMEL2_0vs18	ENSG00000154310	ENSG00000154310	TNIK	-0.21	0.022
SKMEL2_0vs18	ENSG00000197321	ENSG00000197321	SVIL	-0.21	0.04
SKMEL2_0vs18	ENSG00000135318	ENSG00000135318	NT5E	-0.22	0.005
SKMEL30_0vs6	ENSG00000164741	ENSG00000164741	DLC1	-0.22	0.003
SKMEL2_0vs18	ENSG00000156928	ENSG00000156928	MALSU1	-0.23	0.046
SKMEL2_0vs18	ENSG00000164741	ENSG00000164741	DLC1	-0.23	0.001
SKMEL2_0vs18	ENSG00000117519	ENSG00000117519	CNN3	-0.24	0
SKMEL2_0vs18	ENSG00000145390	ENSG00000145390	USP53	-0.25	0.02
SKMEL30_0vs18	ENSG00000164741	ENSG00000164741	DLC1	-0.25	0
SKMEL2_0vs18	ENSG00000135046	ENSG00000135046	ANXA1	-0.26	0
SKMEL2_0vs18	ENSG00000079819	ENSG00000079819	EPB41L2	-0.27	0.015
SKMEL2_0vs18	ENSG00000139613	ENSG00000139613	SMARCC2	-0.27	0.037
SKMEL2_0vs18	ENSG00000164649	ENSG00000164649	CDCA7L	-0.27	0.03
SKMEL2_0vs18	ENSG00000184588	ENSG00000184588	PDE4B	-0.27	0.015
SKMEL2_0vs18	ENSG00000204389	ENSG00000204389	HSPA1A	-0.28	0.004
SKMEL2_0vs18	ENSG00000106780	ENSG00000106780	MEGF9	-0.29	0.007
SKMEL2_0vs6	ENSG00000145390	ENSG00000145390	USP53	-0.3	0.004
SKMEL2_0vs6	ENSG00000124942	ENSG00000124942	AHNAK	-0.31	0.047
SKMEL2_0vs18	ENSG00000159200	ENSG00000159200	RCAN1	-0.31	0.001
SKMEL2_0vs18	ENSG00000184486	ENSG00000184486	POU3F2	-0.31	0.019
SKMEL2_0vs18	ENSG00000173848	ENSG00000173848	NET1	-0.32	0.012
SKMEL2_0vs18	ENSG00000071991	ENSG00000071991	CDH19	-0.34	0.031
SKMEL2_0vs6	ENSG00000164741	ENSG00000164741	DLC1	-0.35	0
SKMEL2_0vs18	ENSG00000081189	ENSG00000081189	MEF2C	-0.37	0.001
SKMEL2_0vs18	ENSG00000128342	ENSG00000128342	LIF	-0.4	0.012
SKMEL2_0vs18	ENSG00000133816	ENSG00000133816	MICAL2	-0.42	0.046
SKMEL2_0vs18	ENSG00000198959	ENSG00000198959	TGM2	-0.42	0.028
SKMEL2_0vs18	ENSG00000151849	ENSG00000151849	CENPJ	-0.43	0.03
SKMEL2_0vs6	ENSG00000118523	ENSG00000118523	CTGF	-0.48	0.019
SKMEL2_0vs18	ENSG00000118523	ENSG00000118523	CTGF	-0.53	0.002
SKMEL2_0vs18	ENSG00000138119	ENSG00000138119	MYOF	-0.57	0.009
SKMEL30_0vs6	ENSG00000107984	ENSG00000107984	DKK1	-0.71	0.037
SKMEL30_0vs6	ENSG00000142871	ENSG00000142871	CYR61	-0.8	0.008
SKMEL30_0vs6	ENSG00000141293	ENSG00000141293	SKAP1	-1.21	0
SKMEL30_0vs18	ENSG00000141293	ENSG00000141293	SKAP1	-2.47	0
